# Supplementary material for: Overcoming resistance to BRAFV600E inhibition in melanoma by deciphering and targeting personalized protein network alterations
Source: NPJ Precis Oncol. 2021 Jun 10;5:50. doi: 10.1038/s41698-021-00190-3 (PMC8192524; doi:10.1038/s41698-021-00190-3)
Supplement: Supplementary file 2 — Supplementary Data 1 [file 41698_2021_190_MOESM2_ESM.xlsx]

## Sheet: lambda
* Threshold values for λα(k) are 2 and -2 (see Methods), i.e., a process, α, is considered active in patient k if λα(k)≥2 or λα(k)≤-2. Values exceeding threshold values are highlighted.
Sample index	Sample ID	Case ID	Cancer Type	BRAFV600E	Sample Type	λ1(k)	λ2(k)	λ3(k)	λ4(k)	λ5(k)	λ6(k)	λ7(k)	λ8(k)	λ9(k)	λ10(k)	λ11(k)	λ12(k)	λ13(k)	λ14(k)	λ15(k)	λ16(k)	λ17(k)
1	TCGA-BF-A5EO-01A-21-A443-20	TCGA-BF-A5EO	SKCM	-	Primary	2.73452	4.26469	3.30686	-3.65339	-0.628319	-2.66595	-3.04091	-0.104017	-0.244324	0.408639	-0.596992	0.582126	0.403305	0.329369	-0.525623	0.197581	2.30406
2	TCGA-EB-A5UM-01A-21-A443-20	TCGA-EB-A5UM	SKCM	-	Primary	2.30533	0.555965	1.43404	-1.64405	-1.25086	0.762483	0.610418	-1.11705	1.05771	1.7886	-0.0178334	-1.38519	1.10524	0.53345	-0.557684	0.380567	-1.41024
3	TCGA-ER-A2NB-01A-21-A20N-20	TCGA-ER-A2NB	SKCM	-	Primary	1.39543	0.684175	2.66037	0.144028	-0.524984	-0.917325	-1.64587	-0.179819	-0.147078	-0.299712	-0.478859	-1.94388	0.780215	1.0309	1.78384	0.0388013	-0.43197
4	TCGA-EB-A4OY-01A-21-A443-20	TCGA-EB-A4OY	SKCM	-	Primary	3.4347	2.62973	2.16904	-2.70958	-2.48848	0.802714	0.208405	-0.153068	0.894556	1.59562	-0.695426	-1.0473	-0.0259876	-0.210693	-0.744507	-0.0192508	-0.100967
5	TCGA-EB-A551-01A-11-A443-20	TCGA-EB-A551	SKCM	-	Primary	0.206518	4.99945	-1.80746	1.62906	0.322924	-1.02882	0.451429	-0.204775	-0.783701	0.351092	-0.830193	-0.20714	-0.190793	-0.591	-0.950169	-0.122238	0.164442
6	TCGA-WE-A8K4-01A-21-A443-20	TCGA-WE-A8K4	SKCM	-	Primary	2.74033	1.22636	0.755162	-1.12701	-3.00271	1.0937	1.34184	-0.317787	1.95854	1.25669	-0.0557794	-1.42303	-0.112724	0.304805	-0.101279	0.219349	-0.235492
7	TCGA-EB-A44O-01A-21-A443-20	TCGA-EB-A44O	SKCM	-	Primary	0.284269	5.07739	-1.43606	0.960201	-0.44869	-0.116233	1.4134	1.25565	0.965163	0.313291	0.255661	-0.12131	0.136677	0.362155	-1.27392	-0.773131	0.906962
8	TCGA-EB-A4XL-01A-21-A443-20	TCGA-EB-A4XL	SKCM	-	Primary	1.60928	3.03873	-0.578181	1.1143	-2.45135	0.418894	2.09473	-1.28927	1.44847	-0.0293198	0.48361	0.0992774	0.125265	0.473749	-0.269538	0.0319741	-0.00315915
9	TCGA-EB-A5VU-01A-11-A443-20	TCGA-EB-A5VU	SKCM	-	Primary	0.440353	3.63124	-1.02246	0.858592	-0.171614	0.0175881	0.556586	-1.01018	0.216216	-0.182007	0.0822543	0.407245	-0.0774123	0.0833865	-0.134578	0.559496	0.202516
10	TCGA-EB-A3Y7-01A-21-A241-20	TCGA-EB-A3Y7	SKCM	-	Primary	1.36474	3.51523	1.44622	-1.26133	0.0427257	-1.08257	-0.887404	1.11847	-0.301403	-0.0392948	0.981339	-0.0707604	0.693585	1.9966	0.431391	-1.1653	0.579474
11	TCGA-EB-A41A-01A-21-A444-20	TCGA-EB-A41A	SKCM	-	Primary	1.72179	4.21368	0.91089	-0.185095	-1.12209	-1.48794	-0.189848	0.90333	-0.391848	-0.471657	0.404729	0.108851	-1.41879	-0.0864668	-0.809557	0.656864	0.517447
12	TCGA-D9-A3Z4-01A-21-A241-20	TCGA-D9-A3Z4	SKCM	-	Primary	0.82954	5.4299	-0.69593	0.571091	0.0631832	0.213341	-0.94306	-1.14612	-0.884079	0.0299095	-0.174486	0.48327	0.590669	0.906325	-0.0840558	-0.0864649	-0.0474514
13	TCGA-XV-A9VZ-01A-21-A444-20	TCGA-XV-A9VZ	SKCM	-	Primary	0.0560644	4.37418	-1.26067	0.978555	0.463898	-1.57764	-0.088402	-1.10691	0.109152	0.149503	-0.728999	0.114339	0.863019	0.533676	-0.0502219	0.392445	-0.618993
14	TCGA-D9-A1X3-01A-21-A20M-20	TCGA-D9-A1X3	SKCM	-	Primary	-0.502458	3.67664	-1.28521	0.845304	1.85121	-1.44494	0.480241	-1.10893	0.215479	0.0234404	-0.324944	0.35569	0.924036	0.0218833	0.276385	-0.134627	-0.539392
15	TCGA-HR-A2OG-01A-11-A20N-20	TCGA-HR-A2OG	SKCM	-	Primary	-0.375234	2.65851	-1.07934	1.78554	-0.281041	-0.190831	0.713854	-1.00615	1.13113	-0.381396	-0.0892517	0.108547	0.685013	0.362346	-0.963529	-1.13608	-0.826836
16	TCGA-BF-AAP1-01A-21-A443-20	TCGA-BF-AAP1	SKCM	-	Primary	0.921694	4.63847	-1.26379	1.54002	0.0854389	-0.175882	-0.200581	-1.22101	0.0785105	-0.103193	-0.303959	0.452959	0.697014	0.173747	0.383541	-0.345723	-0.403878
17	TCGA-FR-A726-01A-21-A444-20	TCGA-FR-A726	SKCM	-	Primary	2.05423	3.95636	0.139819	0.538176	-0.551191	-0.428922	-0.151506	-0.334636	0.401829	0.337871	0.0181184	0.057595	-0.435516	-0.339328	0.709558	-0.260222	0.51268
18	TCGA-BF-AAOU-01A-21-A443-20	TCGA-BF-AAOU	SKCM	-	Primary	1.51664	3.24471	0.779063	0.0739157	-1.33941	-0.530555	-0.288352	-0.826274	-0.251888	0.16087	-0.367146	-0.727981	0.605707	0.437863	-0.219103	0.168041	0.102669
19	TCGA-EB-A85J-01A-21-A443-20	TCGA-EB-A85J	SKCM	-	Primary	1.46666	3.34509	1.7237	-0.389391	2.29691	3.8137	-0.846854	1.58002	-1.01854	0.545112	-0.0549274	-0.610172	-0.778158	-0.121868	0.793349	1.2975	-0.00858836
20	TCGA-ER-A2NF-01A-21-A20N-20	TCGA-ER-A2NF	SKCM	-	Primary	0.419038	4.62155	-0.499413	0.899578	-0.0185698	-2.0753	-0.0861635	-0.930625	0.703832	-0.85574	0.493918	0.286178	-0.701984	-0.898011	0.404293	0.788306	0.120719
21	TCGA-BF-A1PZ-01A-21-A20M-20	TCGA-BF-A1PZ	SKCM	-	Primary	-0.36186	3.51469	0.645547	0.394842	-0.569957	-3.67399	-1.11214	-0.176881	-0.129416	-1.25618	-1.39337	-1.16022	0.72187	0.662431	0.933626	-0.311345	-0.258429
22	TCGA-EB-A41B-01A-21-A444-20	TCGA-EB-A41B	SKCM	-	Primary	0.0575265	0.158232	1.22302	0.627026	0.0128248	0.311207	-0.872106	-0.118473	2.24984	0.226129	-1.3076	-0.781014	1.39675	2.20723	0.833654	-1.97866	-1.60197
23	TCGA-BF-AAOX-01A-21-A443-20	TCGA-BF-AAOX	SKCM	-	Primary	0.138945	4.27631	-0.279191	-0.00632459	1.35487	2.47363	-0.281918	-0.0190427	-0.331899	-0.640163	1.43806	1.15057	0.0879581	-0.153951	-0.335159	-1.47998	-0.377152
24	TCGA-BF-A5ES-01A-21-A443-20	TCGA-BF-A5ES	SKCM	-	Primary	1.77933	1.39639	1.27707	0.133396	-2.28638	0.00136118	0.615631	0.0931138	1.13955	0.431869	-0.341221	-1.34318	0.482266	1.44153	-0.53583	-1.56573	-0.0796494
25	TCGA-EB-A5SF-01A-21-A444-20	TCGA-EB-A5SF	SKCM	-	Primary	1.79391	2.78224	0.385993	-0.534977	0.1516	3.23547	1.24858	-3.54099	-0.123307	-0.607881	0.894636	0.573398	-0.289516	0.714368	0.115305	-0.587691	-0.133716
26	TCGA-BF-AAP8-01A-21-A443-20	TCGA-BF-AAP8	SKCM	-	Primary	-0.125035	3.86743	-0.440649	-0.109054	-0.0591954	-1.64695	-0.158612	0.0862176	0.597239	-0.501055	-1.09017	0.894738	1.96013	0.107566	0.492843	0.359437	-0.180169
27	TCGA-XV-AAZY-01A-21-A444-20	TCGA-XV-AAZY	SKCM	-	Primary	0.21757	5.16475	-0.81978	0.571399	-0.346624	-1.2243	-0.223671	-1.35491	-2.07717	-0.00160433	-1.50689	-0.806051	0.176986	-1.22546	-0.964495	0.822207	0.279404
28	TCGA-GN-A26C-01A-21-A20N-20	TCGA-GN-A26C	SKCM	-	Primary	0.965743	4.58164	-0.0221607	-0.0043736	-0.507864	1.27875	0.294244	1.06937	1.01567	0.0975929	0.42438	0.271873	0.816131	0.107463	-1.24444	-0.306105	-0.379204
29	TCGA-BF-A5EP-01A-21-A443-20	TCGA-BF-A5EP	SKCM	-	Primary	2.09282	0.736087	1.67898	0.416488	-4.36262	-0.916404	1.50658	-1.34039	-0.0168498	-1.21878	0.498205	-1.36805	0.149955	1.21233	0.073236	-0.500705	-0.270515
30	TCGA-EB-A82B-01A-21-A443-20	TCGA-EB-A82B	SKCM	-	Primary	1.66051	4.88688	-0.106855	0.230511	-1.29911	0.839167	0.972065	1.71938	-0.216826	-0.533501	0.956166	0.642738	-0.499193	0.370386	0.76187	-0.37816	1.0351
31	TCGA-BF-A1PX-01A-41-A20M-20	TCGA-BF-A1PX	SKCM	-	Primary	0.652909	5.41015	0.922427	-1.43636	-0.467957	-2.99041	-2.19901	-1.86175	-1.68481	-1.28352	0.33072	0.571059	-1.33001	-0.694733	0.666852	1.19566	0.452056
32	TCGA-ER-A196-01A-21-A20N-20	TCGA-ER-A196	SKCM	-	Primary	1.77947	2.93635	0.649288	0.324343	1.41318	-1.08417	-0.599697	-1.47589	0.403196	0.506491	0.878191	-0.696564	0.151707	0.371403	1.10322	0.535266	0.524578
33	TCGA-ER-A19T-01A-21-A215-20	TCGA-ER-A19T	SKCM	-	Primary	2.25403	3.03381	0.556086	-0.437659	-0.249022	0.15001	-0.894817	0.82853	1.36903	1.64507	-0.450914	-0.657882	-0.42656	-0.167696	-0.0207309	0.618382	-0.441499
34	TCGA-D9-A4Z3-01A-21-A443-20	TCGA-D9-A4Z3	SKCM	-	Primary	0.9841	4.23963	-1.32582	1.83513	0.113197	0.378064	0.0229927	-1.28893	0.457933	0.190887	0.349933	0.383447	-0.467185	0.177145	0.616782	0.286572	0.648896
35	TCGA-EB-A42Y-01A-21-A443-20	TCGA-EB-A42Y	SKCM	-	Primary	0.681876	4.58731	0.421126	-1.60768	-0.846293	-0.696269	0.575547	-0.385161	0.0987463	-0.763239	0.372778	1.14801	1.01575	0.210729	-0.392757	-0.121855	0.562637
36	TCGA-EB-A57M-01A-41-A444-20	TCGA-EB-A57M	SKCM	-	Primary	1.70499	2.99136	1.6968	-2.02928	-1.22569	-0.943674	-0.753778	-1.28387	0.268855	0.136767	0.0843258	-0.218188	0.848876	0.297182	0.716255	0.735606	0.287585
37	TCGA-EE-A29N-06A-21-A20M-20	TCGA-EE-A29N	SKCM	-	Primary	0.913472	3.28707	-0.499095	1.33051	-1.21641	-0.808933	0.844361	1.09423	1.35278	0.170184	0.0883495	-1.47408	-0.997291	0.758872	-0.438622	-0.249955	-0.830539
38	TCGA-D3-A51K-06A-21-A443-20	TCGA-D3-A51K	SKCM	-	Primary	2.45979	0.192928	1.85167	-1.61349	-2.92703	0.401626	0.203356	-0.945318	1.83287	1.88091	-0.580693	-2.22794	1.17506	1.09821	-1.01361	-0.589058	-1.39923
39	TCGA-FS-A1Z0-06A-21-A20N-20	TCGA-FS-A1Z0	SKCM	-	Primary	0.841653	1.64782	0.248094	1.32172	-3.07471	-1.06107	0.950385	-0.66779	-0.154638	-0.77468	-1.21299	-1.1084	1.20111	1.19745	1.03184	0.178556	-1.14835
40	TCGA-GN-A261-06A-21-A20N-20	TCGA-GN-A261	SKCM	-	Primary	1.03267	4.0978	1.20561	-2.47754	-0.260614	-1.83538	-1.45939	-1.04117	-0.591126	-0.242619	0.601903	1.59393	0.942178	0.439937	-0.773316	-0.567401	-0.134639
41	TCGA-EE-A29L-06A-21-A20M-20	TCGA-EE-A29L	SKCM	-	Primary	1.14876	4.25439	-0.764713	1.18489	0.737658	-0.655718	-0.117977	-0.836181	0.346197	0.0273884	-0.38223	0.821544	0.574552	0.592081	1.0053	-0.149835	0.363674
42	TCGA-FS-A1Z3-06A-21-A20N-20	TCGA-FS-A1Z3	SKCM	-	Primary	1.27534	4.24201	0.520526	0.64707	-0.185613	-0.134388	-0.101693	0.761199	-0.289898	-0.337483	0.198682	-0.699027	0.549283	0.0260358	-0.213398	-0.768518	0.0909571
43	TCGA-DA-A1IB-06A-21-A20M-20	TCGA-DA-A1IB	SKCM	-	Primary	1.11309	5.01019	1.42607	-1.47693	-0.273022	-2.78997	-1.9177	0.941515	-0.781188	-0.358307	-0.00155846	0.204305	0.589825	0.909564	-0.483169	-0.228932	0.543687
44	TCGA-W3-AA1O-06A-21-A444-20	TCGA-W3-AA1O	SKCM	-	Primary	0.654593	4.44464	-0.861208	0.325411	-0.380602	-1.72781	-0.737673	-1.69625	1.25542	-0.192834	-0.636003	0.431552	-0.16706	0.421366	1.28873	-0.0351593	-0.45032
45	TCGA-D9-A6EA-06A-21-A444-20	TCGA-D9-A6EA	SKCM	-	Primary	0.202041	1.07181	1.09855	1.87483	-0.845112	-1.27142	0.127876	0.0465907	0.740862	-0.685626	0.898602	-2.30958	0.215951	1.70562	0.665106	-0.558691	-0.295078
46	TCGA-EE-A2GU-06A-21-A20M-20	TCGA-EE-A2GU	SKCM	-	Primary	0.116659	4.97897	-0.870172	1.39268	-0.174632	-0.874911	0.508067	1.56741	1.28925	-0.707081	-0.294501	-0.225242	0.104164	0.238368	0.49268	1.12388	-0.111991
47	TCGA-ER-A195-06A-21-A20N-20	TCGA-ER-A195	SKCM	-	Primary	0.597077	4.6639	-1.36474	1.31021	-2.10912	-0.639327	0.604342	0.0286081	1.76519	-0.695732	-0.133506	-0.873228	-2.00061	-0.262732	-1.11534	0.697897	-0.0822869
48	TCGA-RP-A694-06A-21-A444-20	TCGA-RP-A694	SKCM	-	Primary	0.894053	4.44213	-0.254085	0.723094	-0.772864	-0.374383	0.0440036	-0.205625	1.75171	-0.717218	0.283234	-0.938106	-1.18784	0.476314	0.113295	0.93347	-0.239034
49	TCGA-ER-A1A1-06A-21-A20N-20	TCGA-ER-A1A1	SKCM	-	Primary	-0.186519	3.20269	-0.608713	0.358407	1.33333	-0.650272	-0.585374	-0.787651	0.430369	-0.478298	0.144405	0.306692	0.577655	-0.234447	0.548812	0.187463	-0.0796382
50	TCGA-D3-A2JC-06A-21-A20M-20	TCGA-D3-A2JC	SKCM	-	Primary	1.09652	3.21051	1.5316	-0.353382	-1.50403	-1.25784	-0.814098	-1.68035	-0.792756	-1.41559	0.263117	0.616092	0.392526	0.175244	-0.779213	-0.331093	-1.15133
51	TCGA-D3-A3MV-06A-21-A241-20	TCGA-D3-A3MV	SKCM	-	Primary	1.17913	4.0921	0.486932	-0.0707182	-0.590738	-0.340083	-0.0942392	-0.31022	-1.06182	-0.718798	0.124337	-0.555811	-0.68451	0.0993265	-0.190299	0.481725	0.664016
52	TCGA-GN-A268-06A-21-A20N-20	TCGA-GN-A268	SKCM	-	Primary	0.800595	5.02228	0.203193	0.261206	-1.19053	-0.360352	0.718456	1.98486	0.994844	-1.1377	0.0902268	-1.13539	-0.890784	0.620312	-0.934872	0.26719	0.642205
53	TCGA-D3-A1QA-06A-21-A20M-20	TCGA-D3-A1QA	SKCM	-	Primary	1.16888	4.29288	0.889974	-0.243999	-1.88983	-1.10581	0.426631	-0.367053	0.639905	-1.20023	0.628997	-0.746782	-1.66369	1.08947	0.637741	0.813273	0.895255
54	TCGA-FR-A8YC-06A-21-A444-20	TCGA-FR-A8YC	SKCM	-	Primary	3.33969	2.384	1.34743	-1.87299	-3.88197	0.42773	0.903248	-0.363236	2.08574	1.01679	0.291494	-1.18237	0.280744	0.512556	-0.747513	0.219602	0.417212
55	TCGA-EE-A29V-06A-21-A20M-20	TCGA-EE-A29V	SKCM	-	Primary	-0.0673361	5.44204	-1.48586	0.883925	0.336228	-0.927639	0.856893	0.322645	0.0643797	-0.121447	-0.960613	-1.7718	-1.78456	-0.580682	-0.743307	1.17141	0.0295944
56	TCGA-DA-A1IA-06A-21-A20M-20	TCGA-DA-A1IA	SKCM	-	Primary	2.139	-0.71525	2.40312	-2.30083	-2.63195	-0.930713	0.991663	-0.744967	1.22222	0.823423	-0.150271	-0.72232	1.39382	1.12551	0.691085	0.733547	-1.91169
57	TCGA-D9-A4Z6-06A-21-A443-20	TCGA-D9-A4Z6	SKCM	-	Primary	1.78674	3.46382	2.2844	-1.48082	-0.349211	-2.8318	-1.14426	-0.239574	-0.815888	-0.842218	0.693712	-0.0163348	0.558869	0.764695	0.545808	-0.729952	-0.126715
58	TCGA-FS-A1Z4-06A-21-A20N-20	TCGA-FS-A1Z4	SKCM	-	Primary	1.51305	3.65244	-1.0875	0.717447	0.0991654	-0.473008	0.635858	-0.922919	1.7451	1.25884	0.335481	0.017802	-0.670025	0.72847	0.164947	0.148401	-0.362508
59	TCGA-ER-A19F-06A-21-A20N-20	TCGA-ER-A19F	SKCM	-	Primary	0.588248	4.14168	-0.276546	0.668907	0.248911	-0.702697	0.370328	0.276891	-0.23112	0.148288	-0.619996	-0.290745	-0.0294094	0.442887	-0.714424	-0.0564017	0.0466113
60	TCGA-D9-A3Z1-06A-21-A241-20	TCGA-D9-A3Z1	SKCM	-	Primary	0.392216	3.34492	-0.566741	2.39572	-0.837711	-1.74603	-0.802819	-2.33106	0.146502	-0.769944	0.3045	-0.577678	-0.0943823	0.770958	-0.389476	-1.54085	-1.07525
61	TCGA-ER-A19L-06A-21-A20N-20	TCGA-ER-A19L	SKCM	-	Primary	0.864153	3.49693	0.721171	-0.313815	0.764474	-2.193	-1.06735	-0.999782	0.385309	-0.849811	0.321676	0.334427	-0.618767	0.062948	1.5206	0.624687	0.411443
62	TCGA-EE-A3JH-06A-21-A241-20	TCGA-EE-A3JH	SKCM	-	Primary	3.76723	-1.46279	3.87195	-3.95114	-1.98747	-0.478558	0.168702	-1.22211	2.22617	2.05123	0.934766	-0.182622	0.651732	0.953315	-0.382571	-0.640677	-0.657021
63	TCGA-GN-A267-06A-11-A20N-20	TCGA-GN-A267	SKCM	-	Primary	3.19005	2.81715	1.63607	-3.5515	-4.70796	0.193289	1.10883	-0.577125	1.35615	1.15851	-0.284421	-0.518845	1.33489	-0.782715	-1.13409	0.322777	-0.147738
64	TCGA-EE-A2GK-06A-21-A20M-20	TCGA-EE-A2GK	SKCM	-	Primary	-0.119932	4.78981	-0.664042	0.617585	0.00622251	-1.07539	-0.225178	-2.74	-0.422993	-0.68193	-0.364524	0.565459	1.07852	-0.45223	0.100589	0.531306	-0.416884
65	TCGA-EE-A2MN-06A-21-A20N-20	TCGA-EE-A2MN	SKCM	-	Primary	0.413398	1.65493	0.668086	1.69575	-0.527848	1.35856	0.600682	-1.97398	1.05278	-1.41107	0.386739	-1.23628	0.40171	0.764424	0.736415	0.674767	-1.10217
66	TCGA-ER-A42H-01A-21-A443-20	TCGA-ER-A42H	SKCM	-	Metastatic	1.02601	4.16836	0.552386	-0.429314	0.593325	1.91066	0.357214	1.51516	-0.599561	-0.418082	0.419307	0.0748131	1.22555	-0.395624	0.462272	-0.224676	0.116021
67	TCGA-EB-A3XC-01A-21-A241-20	TCGA-EB-A3XC	SKCM	-	Metastatic	1.19262	4.46079	-0.495823	0.398591	-0.12135	0.433262	-0.782435	-2.28299	0.663648	0.424919	-0.00149149	-0.0690264	0.154002	0.406914	0.0218455	-0.470914	1.31669
68	TCGA-BF-AAP4-01A-21-A443-20	TCGA-BF-AAP4	SKCM	-	Metastatic	0.207207	4.34208	0.596041	-0.314723	1.74969	1.79268	-0.269744	0.732555	-0.809839	-0.865351	-0.0199219	0.531434	0.674258	-0.452248	0.450631	-0.84049	-0.0767378
69	TCGA-EB-A24D-01A-21-A20M-20	TCGA-EB-A24D	SKCM	-	Metastatic	0.0445414	4.07678	-0.870933	0.650881	-0.522058	0.284858	2.06736	-0.141209	-0.523628	-0.855919	0.0937822	0.307866	0.989941	-0.266241	-0.0252241	0.398078	0.00963448
70	TCGA-ER-A194-01A-31-A20N-20	TCGA-ER-A194	SKCM	-	Metastatic	1.13966	3.61694	0.652364	-0.63426	-0.889403	1.6545	-0.130527	2.05057	0.625958	0.32286	-0.575996	-0.0143024	0.269602	-0.224042	1.21238	0.698099	-1.08225
71	TCGA-EB-A1NK-01A-21-A20M-20	TCGA-EB-A1NK	SKCM	-	Metastatic	3.37855	2.75312	1.93494	-1.47165	-1.11273	0.488545	-1.79347	0.572947	-1.2363	1.88565	-0.212155	-0.576375	-1.05256	-0.472223	0.871596	-0.110746	-0.77805
72	TCGA-D9-A4Z5-01A-21-A443-20	TCGA-D9-A4Z5	SKCM	-	Metastatic	0.30739	4.10363	1.04905	-1.38241	0.602937	-2.53939	-1.92149	-1.9974	1.17898	-1.60397	-0.14568	0.868096	-0.622672	0.354542	2.45568	-0.206414	0.298185
73	TCGA-EB-A4OZ-01A-21-A443-20	TCGA-EB-A4OZ	SKCM	-	Metastatic	-1.43388	3.91416	-0.425609	-0.292417	1.69331	-0.519887	0.282484	0.708643	1.19349	-0.713084	-1.09277	0.338106	1.95416	-0.00874503	0.116909	0.592136	-1.0287
74	TCGA-EB-A82C-01A-21-A443-20	TCGA-EB-A82C	SKCM	-	Metastatic	1.01726	3.49092	1.64494	-3.02317	-1.4341	-1.326	-1.95958	0.60871	-0.456264	-0.353952	-0.0621241	1.29828	-0.353755	-0.606956	1.03821	-0.633747	-0.0122703
75	TCGA-DA-A960-01A-21-A444-20	TCGA-DA-A960	SKCM	-	Metastatic	1.0432	4.09489	1.40033	0.431526	1.04182	0.26133	-1.59688	-0.466081	-0.59458	-0.401281	0.164005	-0.857427	-0.697695	0.608865	0.26073	0.731216	1.44278
76	TCGA-FR-A3R1-01A-21-A241-20	TCGA-FR-A3R1	SKCM	-	Metastatic	-0.537423	4.71568	-1.11105	-1.04965	1.06162	2.19073	-0.365069	1.73157	1.36152	0.205355	0.230837	2.26958	0.117583	-0.737352	0.237488	-0.348158	-0.66528
77	TCGA-GN-A8LN-01A-21-A443-20	TCGA-GN-A8LN	SKCM	-	Metastatic	1.5268	3.56299	0.480871	-0.774863	-1.15227	1.49111	-0.265391	0.642696	0.435639	0.273778	0.588983	0.736784	1.01813	-0.567663	0.051088	-0.0781297	-0.109716
78	TCGA-XV-A9W2-01A-21-A444-20	TCGA-XV-A9W2	SKCM	-	Metastatic	0.6754	3.62354	-1.06742	0.996162	0.608319	0.377102	0.0900157	-0.114694	-1.11065	0.531538	-1.2263	-0.1395	1.30561	-0.277018	-0.227368	0.880771	0.0659968
79	TCGA-EB-A97M-01A-21-A443-20	TCGA-EB-A97M	SKCM	-	Metastatic	0.399635	4.56854	-2.58518	2.11206	0.403231	-0.230753	-0.201076	-2.56745	1.90423	0.0536264	-0.392721	0.0727368	0.694599	0.20788	-0.776398	0.0657319	0.317059
80	TCGA-EB-A4IQ-01A-21-A443-20	TCGA-EB-A4IQ	SKCM	-	Metastatic	1.79607	4.48673	1.03632	-0.163888	-1.93558	0.0569606	-0.448416	-0.438972	-0.431287	-0.839914	0.202999	0.63931	0.199067	-0.647148	0.4637	-0.173742	0.12892
81	TCGA-DA-A95X-06A-21-A443-20	TCGA-DA-A95X	SKCM	-	Metastatic	0.564449	4.29105	-0.569862	0.694376	0.495468	-0.455679	0.342293	0.73302	-0.0402634	0.500986	0.0633622	-1.31568	0.372893	0.328027	-0.0746295	1.09381	0.545316
82	TCGA-EE-A29B-06A-31-A20M-20	TCGA-EE-A29B	SKCM	-	Metastatic	2.00613	1.46279	1.28399	0.574012	-1.84023	0.382117	0.314453	0.558707	-1.0219	0.859901	-1.35528	-1.48064	1.05783	0.796023	0.399205	0.10268	-0.870864
83	TCGA-D3-A8GC-06A-21-A443-20	TCGA-D3-A8GC	SKCM	-	Metastatic	0.572516	4.09464	-0.40901	0.530276	1.79016	0.410207	0.43975	0.0245806	-0.490801	0.276126	-0.623516	-0.605583	0.143879	-0.411809	0.286499	-0.524726	0.562413
84	TCGA-FS-A4FC-06A-21-A443-20	TCGA-FS-A4FC	SKCM	-	Metastatic	1.06703	4.48426	0.944064	-0.913604	0.767316	3.24198	-0.463146	-0.696632	-1.46108	-0.542121	0.361903	0.238635	0.053497	-0.548336	-0.643375	-1.24501	0.0609337
85	TCGA-WE-A8K1-06A-11-A443-20	TCGA-WE-A8K1	SKCM	-	Metastatic	0.712502	3.38077	-0.0575003	1.10427	1.01488	1.11237	0.209099	0.175662	-0.472309	0.46005	-0.44775	-1.07936	0.570394	-0.378215	-0.0335109	0.233302	0.761567
86	TCGA-D3-A8GP-06A-21-A443-20	TCGA-D3-A8GP	SKCM	-	Metastatic	3.02914	3.96574	0.166642	-0.808932	-3.47997	2.66885	1.13786	0.358962	-2.74643	0.934493	0.461263	-0.159882	0.260461	-0.208024	-0.720892	-0.404837	-0.568723
87	TCGA-ER-A19D-06A-21-A20N-20	TCGA-ER-A19D	SKCM	-	Metastatic	0.923839	4.08673	0.514069	-0.0650608	1.57636	2.63846	0.20363	2.05956	0.793701	-0.947126	0.908272	1.07303	0.71822	0.403927	1.19926	0.708687	-0.243392
88	TCGA-DA-A3F2-06A-21-A241-20	TCGA-DA-A3F2	SKCM	-	Metastatic	1.18966	3.76643	1.29542	-1.22708	1.65269	1.28818	-0.720323	-0.159746	-1.81174	0.409586	-0.490984	-0.329578	0.838913	-0.750632	-0.393849	0.414196	0.597167
89	TCGA-FR-A3YO-06A-21-A241-20	TCGA-FR-A3YO	SKCM	-	Metastatic	1.35405	3.95475	-1.91003	1.33802	0.487365	0.622283	0.682845	-1.99775	0.342536	1.81145	1.19476	-0.142433	-1.29689	0.0103919	0.00349674	-0.766212	-0.511244
90	TCGA-EE-A3J7-06A-21-A241-20	TCGA-EE-A3J7	SKCM	-	Metastatic	1.0323	3.51492	0.134944	0.371116	0.194619	1.84624	-0.182531	2.34149	-1.38	0.375505	-0.719136	0.685991	-0.0270561	0.276613	0.867749	-0.06709	-0.321079
91	TCGA-GF-A3OT-06A-11-A241-20	TCGA-GF-A3OT	SKCM	-	Metastatic	0.845627	3.85467	-0.728856	1.9456	-0.497089	-1.10894	0.181748	-0.832352	0.370618	0.343053	0.702585	-0.683315	0.337059	0.278201	-0.811709	-0.527117	0.172911
92	TCGA-WE-A8JZ-06A-21-A443-20	TCGA-WE-A8JZ	SKCM	-	Metastatic	1.54282	3.39383	-1.95684	1.66015	0.36005	-0.88016	0.557275	-1.68957	1.76453	1.6767	-0.641525	-0.246247	0.811916	0.816684	0.085664	0.160399	0.925881
93	TCGA-D3-A51T-06A-21-A443-20	TCGA-D3-A51T	SKCM	-	Metastatic	-0.272498	2.94288	-1.23003	1.30264	-0.281546	-0.114144	1.1134	-0.274892	1.25707	-0.149189	0.415422	0.549263	-0.342558	-0.157166	-0.854983	0.121897	-0.346634
94	TCGA-YD-A89C-06A-21-A443-20	TCGA-YD-A89C	SKCM	-	Metastatic	-0.0411159	4.06264	0.150173	-0.274586	0.827283	2.27692	-0.166057	-0.340644	-0.448117	-0.480392	-0.773068	0.321105	1.74135	0.172828	0.869783	0.925306	0.438252
95	TCGA-DA-A3F3-06A-21-A241-20	TCGA-DA-A3F3	SKCM	-	Metastatic	0.313387	4.55486	-1.05179	-0.199679	0.399791	0.427908	0.845241	-0.121358	0.114759	0.864745	-0.199434	1.70113	1.46585	-1.23894	-0.8708	-0.512251	0.0200581
96	TCGA-EB-A44Q-06A-21-A443-20	TCGA-EB-A44Q	SKCM	-	Metastatic	1.49588	3.18026	-1.29076	1.16106	-0.550963	0.418746	0.188454	-0.924726	-0.275687	1.6517	-0.752044	-0.298701	0.575994	0.458818	0.147812	-0.634772	-0.510613
97	TCGA-EB-A44R-06A-51-A443-20	TCGA-EB-A44R	SKCM	-	Metastatic	0.916561	3.57149	-0.599694	1.50896	0.784697	1.36435	0.547787	1.35662	0.243954	1.00977	0.273824	-0.0228834	1.6413	0.536741	0.424269	0.075734	0.823147
98	TCGA-EE-A2MJ-06A-21-A20N-20	TCGA-EE-A2MJ	SKCM	-	Metastatic	1.53749	2.9013	-0.349317	0.555481	1.35969	-1.3198	1.72212	0.848038	0.367427	1.00801	-0.0904012	-0.375571	0.588842	-0.0522498	0.167722	0.196794	0.525407
99	TCGA-EE-A180-06A-21-A241-20	TCGA-EE-A180	SKCM	-	Metastatic	-0.0999829	4.19417	-1.40828	0.450709	1.20262	-1.17275	0.541159	-0.0867959	0.674031	0.837104	-0.7844	1.09015	0.72857	-1.01947	-0.352831	1.19193	-0.739597
100	TCGA-EB-A6L9-06A-21-A444-20	TCGA-EB-A6L9	SKCM	-	Metastatic	0.2199	4.41691	-1.3196	-0.258056	0.948169	0.0210818	1.25492	-0.11417	0.903585	0.570267	0.244957	-0.493745	-0.190575	0.510465	0.673975	1.47202	-0.530173
101	TCGA-EE-A2GP-06A-21-A20M-20	TCGA-EE-A2GP	SKCM	-	Metastatic	-0.273654	3.69111	-0.470353	0.678636	2.70703	0.0292647	-0.406866	-1.65753	-0.76585	-0.334471	-0.653094	-0.280336	0.721418	-0.160638	1.24349	-0.468738	-0.634894
102	TCGA-EE-A2GC-06A-21-A20M-20	TCGA-EE-A2GC	SKCM	-	Metastatic	4.40279	3.27032	1.84914	-3.63717	-1.24116	0.484472	0.850577	-0.00569832	1.55696	1.90155	0.957267	0.632627	-0.864193	-1.18404	-1.84559	-1.29145	1.07258
103	TCGA-DA-A1HV-06A-41-A20M-20	TCGA-DA-A1HV	SKCM	-	Metastatic	1.95221	4.10268	3.31019	-3.76739	-1.10626	-1.36919	-2.63243	1.14971	-1.87171	-0.633287	0.573507	-0.326636	-0.261149	0.73576	-0.00765003	-0.447839	0.761675
104	TCGA-ER-A19A-06A-11-A20N-20	TCGA-ER-A19A	SKCM	-	Metastatic	0.191921	4.47308	-1.13609	1.24573	0.45666	-1.02533	0.387978	-0.352659	0.717916	-0.3753	-0.344597	0.479093	0.848173	-0.666711	-0.284683	0.256391	0.509502
105	TCGA-EB-A5SG-06A-21-A444-20	TCGA-EB-A5SG	SKCM	-	Metastatic	0.618335	4.67808	-2.24252	0.399802	-0.199355	0.167649	0.0851059	-1.71001	0.0773561	0.804269	-0.288167	0.649236	-0.334639	-1.24987	-0.319749	-0.246513	-0.625749
106	TCGA-EE-A185-06A-21-A20M-20	TCGA-EE-A185	SKCM	-	Metastatic	1.32451	4.64365	1.00135	0.212789	0.435603	2.9582	-0.866372	-0.777908	-1.21672	-0.509228	0.71924	-0.490824	-0.339097	-0.69438	0.114245	0.332475	-0.162891
107	TCGA-EE-A3AA-06A-21-A20N-20	TCGA-EE-A3AA	SKCM	-	Metastatic	0.679173	4.8271	-0.972493	-0.042782	0.438188	-0.914382	0.372976	1.86926	0.0750861	0.446597	-0.69454	0.887129	0.938801	-0.835635	-0.924346	0.364258	-0.181756
108	TCGA-FS-A1ZK-06A-21-A20N-20	TCGA-FS-A1ZK	SKCM	-	Metastatic	1.19597	4.83393	-0.173107	-0.368763	-0.153061	0.59049	-1.28832	-0.319607	0.636337	0.317074	0.0670906	-0.0255905	-1.01732	-0.365356	0.62295	-0.214185	0.900097
109	TCGA-D3-A51E-06A-21-A443-20	TCGA-D3-A51E	SKCM	-	Metastatic	2.01652	2.59184	-0.314267	1.3491	1.13655	-0.195395	2.09779	-0.232013	0.186434	1.53394	1.22949	0.261789	0.644482	0.331587	-0.047808	-0.40331	0.489488
110	TCGA-EB-A5VV-06A-21-A443-20	TCGA-EB-A5VV	SKCM	-	Metastatic	1.96554	4.58309	-0.3104	-0.496498	-1.03082	-0.554783	0.691289	0.772331	1.9194	0.924518	-0.0802396	-1.12846	-0.648704	-0.81166	-0.261976	0.222445	0.021547
111	TCGA-D3-A1Q8-06A-21-A20M-20	TCGA-D3-A1Q8	SKCM	-	Metastatic	0.27831	4.60464	-1.05169	0.0475704	0.762036	-0.658407	-0.800764	-3.29858	1.87168	-0.227419	-0.163462	0.920162	-0.188087	0.125637	0.0566212	-0.540931	0.42696
112	TCGA-D3-A2JO-06A-21-A20M-20	TCGA-D3-A2JO	SKCM	-	Metastatic	2.01996	4.72888	1.10692	-2.77522	-0.513948	0.688345	-0.533247	1.16142	1.97409	0.835519	-0.0542014	-0.310469	0.18969	-0.663114	-0.0481535	-0.233605	0.368028
113	TCGA-EE-A3AC-06A-21-A20N-20	TCGA-EE-A3AC	SKCM	-	Metastatic	-0.44801	4.5133	-1.7284	0.783855	0.850905	-1.27454	0.0824163	-1.98096	0.468492	-0.08561	-0.932275	0.474979	-0.0762419	-0.569583	0.32142	-1.32701	-0.517237
114	TCGA-GN-A8LL-06A-31-A443-20	TCGA-GN-A8LL	SKCM	-	Metastatic	0.804427	3.59563	0.377107	0.153836	-1.42306	-1.45369	-1.54827	-1.52983	-0.478362	-0.775774	-0.239722	-0.362479	-0.735405	0.473243	0.663546	-0.988911	-0.686737
115	TCGA-EE-A2MR-06A-21-A20N-20	TCGA-EE-A2MR	SKCM	-	Metastatic	0.587563	3.25468	1.20147	-1.34648	-0.252759	2.32331	1.10611	-0.860399	0.138065	-0.846844	0.731764	0.348273	0.619188	-0.0440011	1.3067	1.05206	-0.238648
116	TCGA-DA-A1IC-06A-21-A20M-20	TCGA-DA-A1IC	SKCM	-	Metastatic	0.646936	5.28071	-1.30036	-0.100703	0.55365	0.392157	1.02529	1.16856	0.284603	0.831135	0.59625	0.685849	0.129669	0.662692	-0.475463	-2.58952	-0.0710839
117	TCGA-FS-A1ZA-06A-21-A20N-20	TCGA-FS-A1ZA	SKCM	-	Metastatic	0.296328	4.62921	-1.17015	1.20151	0.43408	1.25505	0.0884108	-1.10897	0.813655	0.423381	0.759141	-0.878499	-1.04356	-0.88797	-0.595253	0.526209	-0.345004
118	TCGA-FS-A1ZG-06A-21-A20N-20	TCGA-FS-A1ZG	SKCM	-	Metastatic	1.45619	4.0181	0.34359	-0.054652	1.46471	2.71521	0.355156	1.74315	0.650246	0.72066	0.338429	0.638335	1.30948	0.615372	0.699655	0.123095	0.591274
119	TCGA-EB-A5KH-06A-21-A443-20	TCGA-EB-A5KH	SKCM	-	Metastatic	0.665557	4.22769	0.162711	-0.154633	-0.982581	-1.19358	0.531625	2.14459	-0.22932	-0.0249239	-2.09958	-0.643851	-0.774927	-0.473601	-0.254002	1.48398	-0.185645
120	TCGA-EE-A184-06A-21-A20M-20	TCGA-EE-A184	SKCM	-	Metastatic	0.462737	4.84572	-0.819907	0.791884	0.484301	-1.08093	0.555095	1.56604	0.18884	-0.356594	0.761723	0.688217	-0.249233	-0.506996	-0.896786	-0.42119	0.196322
121	TCGA-FW-A3I3-06A-21-A241-20	TCGA-FW-A3I3	SKCM	-	Metastatic	-0.559605	4.75769	-1.15351	-0.360716	1.48655	-1.28952	-0.270052	-1.92864	0.511555	-0.714974	-0.708841	0.771895	-0.349755	-0.838429	-0.627211	-0.619909	-0.626948
122	TCGA-EE-A2A2-06A-21-A20M-20	TCGA-EE-A2A2	SKCM	-	Metastatic	1.02254	4.2247	0.507085	0.529622	0.665515	1.19453	0.022496	1.65698	-1.01021	0.348683	-0.330437	-1.16079	0.334589	-0.260913	0.171308	-0.931814	0.124493
123	TCGA-FS-A1ZT-06A-21-A20N-20	TCGA-FS-A1ZT	SKCM	-	Metastatic	2.07405	1.1118	0.673121	0.897608	-0.966863	0.776797	1.53206	-0.150476	0.535327	0.242713	0.415335	-1.5621	0.19951	0.018448	0.386596	-0.989815	0.204074
124	TCGA-ER-A3ET-06A-21-A241-20	TCGA-ER-A3ET	SKCM	-	Metastatic	0.09787	4.76504	0.408842	-0.308678	2.17822	3.60422	-0.893065	-2.90684	-1.20107	-0.739364	0.050852	-0.835947	-0.432643	-0.0072596	-0.110674	0.289729	-0.0912545
125	TCGA-EE-A2MI-06A-21-A20N-20	TCGA-EE-A2MI	SKCM	-	Metastatic	1.48805	3.48702	0.0216454	0.0959864	0.100505	1.91126	-0.494609	3.00195	0.930956	0.890327	-0.585879	0.748262	-0.174135	-0.19156	1.46444	0.954711	-0.384616
126	TCGA-EE-A3JA-06A-21-A241-20	TCGA-EE-A3JA	SKCM	-	Metastatic	1.76719	3.64981	-0.308464	1.29703	2.05039	3.85809	-0.327825	-3.31074	1.91268	0.305451	0.7703	0.569604	0.131272	0.410821	0.507449	0.29467	-0.464873
127	TCGA-EE-A2ML-06A-21-A20N-20	TCGA-EE-A2ML	SKCM	-	Metastatic	2.65764	2.54644	2.39843	-2.56923	-1.49917	-1.66036	-0.576166	1.11748	-0.645948	0.0109137	0.499376	0.633323	0.339513	1.26091	0.217246	0.403005	-0.451686
128	TCGA-EE-A2MD-06A-21-A20N-20	TCGA-EE-A2MD	SKCM	-	Metastatic	0.750537	4.4688	-0.927674	0.640288	1.46743	0.835468	0.549266	-1.92419	1.43217	-0.0914351	0.849522	-0.480735	-0.465916	0.590295	0.213245	0.00717256	-0.0796282
129	TCGA-EE-A2MS-06A-21-A20N-20	TCGA-EE-A2MS	SKCM	-	Metastatic	0.319805	4.78528	-1.25037	0.46826	0.481397	0.570566	0.199085	-2.18018	0.482938	-0.503215	0.814342	1.12577	-0.665905	-0.057062	0.855142	0.0101117	0.052574
130	TCGA-D3-A8GM-06A-21-A443-20	TCGA-D3-A8GM	SKCM	-	Metastatic	0.953921	4.953	-1.6098	1.18479	-0.00858726	-0.531512	0.339391	-0.636154	-0.0825289	0.354108	-1.27578	0.37223	0.788403	-0.723621	0.0767431	-0.272152	-0.657456
131	TCGA-RP-A6K9-06A-51-A444-20	TCGA-RP-A6K9	SKCM	-	Metastatic	2.62424	3.21679	1.7233	-2.17556	-2.92925	1.20508	1.62024	-0.324819	0.0942386	-0.216919	1.3757	0.621319	0.329136	-0.711956	0.170967	-0.294973	-0.297238
132	TCGA-D3-A2J8-06A-21-A20M-20	TCGA-D3-A2J8	SKCM	-	Metastatic	-0.230856	4.71435	-0.453449	-0.223079	1.64027	2.26865	-0.0994864	-2.0991	1.19692	-0.450153	1.19045	1.64593	0.279584	-0.59357	-0.214182	-0.289716	-1.06096
133	TCGA-WE-A8ZY-06A-21-A444-20	TCGA-WE-A8ZY	SKCM	-	Metastatic	0.877575	3.26609	0.81619	0.139619	0.352688	2.10224	-0.50967	0.209537	-2.95702	0.108651	-0.762142	-0.783588	0.126475	0.0697977	-0.0749546	-0.5396	-0.472176
134	TCGA-ER-A197-06A-41-A20N-20	TCGA-ER-A197	SKCM	-	Metastatic	0.240113	3.47651	-0.452165	0.464105	-0.24007	0.96251	1.5705	0.237958	0.224958	-0.890041	0.409163	0.266741	1.15203	0.224585	0.798471	-0.305583	0.0864781
135	TCGA-ER-A19N-06A-21-A20N-20	TCGA-ER-A19N	SKCM	-	Metastatic	2.26975	3.79901	0.279624	0.571628	-0.67575	1.11246	0.920677	2.50586	-0.183703	-0.0140149	0.0736403	0.0836636	0.249119	0.411161	0.836431	-0.945352	0.0517692
136	TCGA-EE-A2MT-06A-21-A20N-20	TCGA-EE-A2MT	SKCM	-	Metastatic	0.724358	4.58274	-0.819724	-0.423645	1.08499	0.618657	0.265568	-0.0738598	-0.505822	0.921642	0.192128	0.316515	0.095534	0.597625	0.433142	-0.0594458	-0.154282
137	TCGA-ER-A193-06A-21-A20N-20	TCGA-ER-A193	SKCM	-	Metastatic	0.882248	3.90391	0.16368	-0.337748	0.774072	1.24305	-0.214824	0.884895	-0.731491	0.685385	-0.265413	0.609686	0.490678	-0.725451	-0.295848	-0.091611	-0.426326
138	TCGA-FS-A1YW-06A-21-A20N-20	TCGA-FS-A1YW	SKCM	-	Metastatic	1.82034	-0.128652	-0.322428	-0.224882	-3.9595	2.08951	3.81089	1.4007	-0.683761	0.566595	1.15962	0.584819	0.473083	1.57525	0.546356	-0.355199	0.20646
139	TCGA-WE-AAA3-06A-21-A444-20	TCGA-WE-AAA3	SKCM	-	Metastatic	0.599839	4.70991	-0.723683	0.205918	1.31706	-0.164152	-0.270088	-1.84028	1.48706	-0.0669701	0.385033	1.0733	0.00526294	0.203415	-0.368795	-0.458841	0.895265
140	TCGA-EE-A17X-06A-21-A20M-20	TCGA-EE-A17X	SKCM	-	Metastatic	1.28187	4.31256	-0.00941669	0.418869	-1.37883	0.343856	-0.26941	-1.45834	-1.9278	-0.613594	-0.208425	-0.662517	-0.184227	-0.80308	-0.694986	-0.00843867	0.435996
141	TCGA-FR-A69P-06A-11-A444-20	TCGA-FR-A69P	SKCM	-	Metastatic	0.212555	4.17008	-0.614725	0.793035	0.676692	-0.635541	-0.077163	-0.519344	-0.0852805	-0.131326	-0.0463885	0.296542	0.833589	-0.547388	0.172103	-0.375465	0.0822893
142	TCGA-DA-A95Y-06A-21-A444-20	TCGA-DA-A95Y	SKCM	-	Metastatic	1.29354	4.94941	-0.486	-0.000310497	-1.29169	0.576018	-0.183504	1.77785	-0.308355	0.38853	-0.0431546	0.0519539	-0.83456	-0.647512	-1.25906	-0.361689	-0.546397
143	TCGA-WE-AA9Y-06A-21-A444-20	TCGA-WE-AA9Y	SKCM	-	Metastatic	0.90701	5.24811	-0.0375208	0.236481	0.844497	1.057	-0.116523	0.114774	-0.429718	-0.469166	-0.0850808	-0.269384	-0.530176	-0.309696	-1.11011	-0.080899	0.699037
144	TCGA-EE-A182-06A-21-A20M-20	TCGA-EE-A182	SKCM	-	Metastatic	0.16368	3.74101	-0.964718	1.04521	2.19443	1.3366	0.442337	-0.584955	-0.839155	0.525466	-0.417593	-0.378985	1.04959	-0.397316	0.31852	0.647946	0.178535
145	TCGA-D3-A1Q1-06A-11-A20M-20	TCGA-D3-A1Q1	SKCM	-	Metastatic	2.36704	2.64289	3.43759	-3.71859	1.25886	-1.12592	-1.95075	-0.359058	0.321501	0.712812	0.80496	0.823739	-0.0914008	0.927837	-0.190895	-0.0143528	2.48137
146	TCGA-YG-AA3P-06A-21-A444-20	TCGA-YG-AA3P	SKCM	-	Metastatic	0.944224	4.25433	0.739615	-0.99201	-0.613101	-1.79648	-0.989902	-0.925383	0.301774	-0.637784	0.146476	0.996923	0.0470264	0.404321	0.564583	-0.749129	-0.0621267
147	TCGA-EE-A3AE-06A-21-A20N-20	TCGA-EE-A3AE	SKCM	-	Metastatic	-0.463868	4.84523	-2.44399	1.46101	0.720813	-1.68701	0.444864	-1.74066	0.780333	-0.267314	-0.219432	0.854782	0.647475	-0.74359	-0.848207	-0.740906	-0.438507
148	TCGA-RP-A695-06A-21-A444-20	TCGA-RP-A695	SKCM	-	Metastatic	2.1363	4.1149	0.997824	-1.00402	-1.96122	-0.672936	-0.316922	-2.8118	0.296348	-0.756292	-0.748795	-0.0489545	-0.773093	-0.977364	1.62662	1.01407	0.463689
149	TCGA-EE-A2MM-06A-21-A20N-20	TCGA-EE-A2MM	SKCM	-	Metastatic	-0.035225	3.66723	-0.128399	-1.02521	1.29924	0.69942	-0.039884	0.409416	-0.510252	0.483796	-1.35729	0.788834	1.46815	0.647346	0.394253	-0.29179	-1.1915
150	TCGA-EE-A2GI-06A-21-A20M-20	TCGA-EE-A2GI	SKCM	-	Metastatic	0.75484	5.43541	-0.945802	1.33009	-0.199996	1.34021	-0.111545	0.444055	0.842389	0.0310842	1.09804	0.332559	-0.244297	-0.47163	-1.85082	-1.02172	0.353121
151	TCGA-ER-A2NH-06A-21-A20N-20	TCGA-ER-A2NH	SKCM	-	Metastatic	1.23647	3.67733	1.38088	-1.87354	0.115911	0.638655	0.435567	-0.278567	-1.30812	-0.325716	0.398872	0.664985	1.72684	-0.581231	0.581288	0.678268	-1.37508
152	TCGA-D3-A8GR-06A-21-A443-20	TCGA-D3-A8GR	SKCM	-	Metastatic	1.21686	3.61926	0.614283	0.030561	-0.166423	1.6711	-0.219222	0.608373	-1.89664	-0.148118	-0.654977	-1.17294	0.429041	0.950329	0.991691	0.922825	1.00004
153	TCGA-D3-A2J6-06A-21-A20M-20	TCGA-D3-A2J6	SKCM	-	Metastatic	0.944903	4.2285	-0.432867	-0.114947	1.95499	2.7139	0.611371	1.24312	-0.820967	1.03628	-0.466318	0.310568	0.980674	0.375547	0.370965	-0.00879688	0.00369472
154	TCGA-GN-A26D-06A-21-A20N-20	TCGA-GN-A26D	SKCM	-	Metastatic	1.40208	3.319	-0.0575444	0.517458	1.62879	-1.02941	0.21966	-0.171883	0.918508	0.978863	0.12934	-0.894877	-0.403338	0.0279591	0.927385	0.128824	0.846194
155	TCGA-EE-A181-06A-21-A20M-20	TCGA-EE-A181	SKCM	-	Metastatic	1.42903	3.61763	-0.946625	0.247221	-0.728302	1.26701	1.35707	-2.55307	0.638251	0.115948	-0.302412	0.967296	-0.252577	-0.140551	0.0133416	0.0453654	-0.698069
156	TCGA-3N-A9WC-06A-21-A444-20	TCGA-3N-A9WC	SKCM	-	Metastatic	-0.0181836	4.41788	-0.815812	-0.453923	1.34191	-2.3227	-0.678955	-0.767427	0.037621	0.555077	-0.834639	0.858496	0.984445	-0.307181	-0.735185	-0.138674	-0.494801
157	TCGA-3N-A9WD-06A-21-A444-20	TCGA-3N-A9WD	SKCM	-	Metastatic	1.16583	4.33468	-0.687282	-0.133389	-0.711699	0.206339	0.063478	1.42541	0.928286	2.09192	-0.299276	0.313248	1.84786	1.66168	-1.09738	0.0132832	-0.0588269
158	TCGA-ER-A199-06A-21-A20N-20	TCGA-ER-A199	SKCM	-	Metastatic	1.926	4.48193	-0.897777	0.433407	-2.79891	1.62371	2.6298	-0.000328655	0.202639	0.213912	0.669078	0.648284	-0.18577	0.0414404	0.521731	-0.383322	0.593282
159	TCGA-EE-A2MC-06A-21-A20M-20	TCGA-EE-A2MC	SKCM	-	Metastatic	2.24985	3.60819	0.512303	0.139155	-3.64669	0.564007	-0.320825	1.64466	0.574423	0.447737	-0.896073	-1.31064	0.694829	-0.382863	0.58486	-0.356807	1.01148
160	TCGA-D9-A1JW-06A-21-A20M-20	TCGA-D9-A1JW	SKCM	-	Metastatic	0.882845	4.84232	-0.118938	0.526505	0.495547	-0.034531	0.57912	1.26296	0.715099	-0.508654	0.892728	0.243127	-0.374821	0.0284081	-1.03682	-0.990837	0.740263
161	TCGA-GN-A266-06A-21-A20N-20	TCGA-GN-A266	SKCM	-	Metastatic	-0.261442	5.56447	-0.734335	-0.263042	0.0653007	-0.721849	1.14236	2.03316	-0.196372	-0.833698	-0.191629	0.73559	1.12363	-0.443315	-1.03413	-0.385433	-0.0541689
162	TCGA-EB-A5SH-06A-21-A444-20	TCGA-EB-A5SH	SKCM	-	Metastatic	0.855944	3.96579	0.619636	-0.834633	-0.129358	1.97922	0.322309	0.827673	-0.286551	-0.833964	0.134967	0.443334	0.598887	-0.180293	0.654711	-0.30736	0.43908
163	TCGA-GN-A264-06A-21-A20N-20	TCGA-GN-A264	SKCM	-	Metastatic	1.01565	4.13068	0.133026	0.0787933	-0.0273446	0.728076	-0.139992	1.17935	-0.184629	0.278281	0.614945	0.540553	0.711672	-0.410116	-0.70243	-1.23386	-0.183144
164	TCGA-Z2-AA3S-06A-21-A444-20	TCGA-Z2-AA3S	SKCM	-	Metastatic	0.223738	4.44974	-1.79018	1.64821	0.298398	-0.479324	0.0956237	-0.214734	0.448521	0.352522	-0.662569	0.190487	1.87017	0.135508	-0.111563	0.36206	0.5562
165	TCGA-RP-A693-06A-21-A444-20	TCGA-RP-A693	SKCM	-	Metastatic	0.494358	3.12237	0.292609	0.321123	2.18631	1.50084	-0.087089	-0.4163	0.127243	0.0208413	0.571939	-0.534339	0.363966	-0.282123	0.773763	-0.302848	-0.446824
166	TCGA-EE-A2A0-06A-21-A20M-20	TCGA-EE-A2A0	SKCM	-	Metastatic	-0.511683	4.84431	-1.42418	-0.0019521	-0.678003	-2.29842	0.650218	-1.27214	-0.0057205	-1.20946	-0.832706	1.45178	0.151473	-0.653064	0.766945	-0.179246	-0.649636
167	TCGA-ER-A2NE-06A-11-A20N-20	TCGA-ER-A2NE	SKCM	-	Metastatic	3.07334	4.70768	0.569963	-0.944448	-4.29468	0.0576885	0.813294	1.1008	0.466984	1.04893	-0.108357	-1.16633	-0.708761	-0.705579	-0.342129	-0.643368	0.802267
168	TCGA-GN-A4U9-06A-22-A444-20	TCGA-GN-A4U9	SKCM	-	Metastatic	0.85781	5.00164	-0.612499	0.3314	1.48919	0.931638	0.557166	1.11426	0.546195	0.463448	-0.209818	0.903162	1.44299	1.42392	0.518309	-0.279708	0.699078
169	TCGA-GN-A8LK-06A-21-A443-20	TCGA-GN-A8LK	SKCM	-	Metastatic	-0.0342787	4.75965	-1.00847	0.914109	1.17699	-1.34084	-0.48316	-0.444778	0.121508	-0.542024	-0.0611715	0.871373	1.32646	-0.826057	-0.319584	0.0576486	-0.143653
170	TCGA-YG-AA3O-06A-21-A444-20	TCGA-YG-AA3O	SKCM	-	Metastatic	0.836243	4.86871	0.015939	1.0722	-0.348011	0.814747	0.392646	1.33269	0.533807	-0.921189	0.572055	0.744812	0.888419	-0.333185	-0.716848	-0.443984	0.597188
171	TCGA-EE-A29R-06A-21-A20M-20	TCGA-EE-A29R	SKCM	-	Metastatic	0.427276	3.4498	0.783549	0.211131	0.354333	1.86547	-0.60412	1.16539	-1.7493	-0.246447	-0.0957312	-0.854479	0.0241715	0.0162443	0.659975	-0.498271	-0.380695
172	TCGA-FS-A1ZU-06A-21-A20N-20	TCGA-FS-A1ZU	SKCM	-	Metastatic	0.121379	5.25146	-0.799853	-0.323441	-0.0891146	-0.473212	-0.284196	-0.0572903	-1.72433	0.185807	-0.613764	-0.630706	-0.215064	-0.715375	-1.48009	-0.994605	0.262872
173	TCGA-D3-A51H-06A-21-A443-20	TCGA-D3-A51H	SKCM	-	Metastatic	1.75789	3.93596	0.305365	-0.245605	-0.934322	-0.850162	-1.0597	0.150111	0.345464	0.274918	-0.355685	0.162324	0.502248	-0.661564	1.41064	0.35809	0.159356
174	TCGA-FR-A8YD-06A-21-A444-20	TCGA-FR-A8YD	SKCM	-	Metastatic	0.664491	3.07481	-1.7097	-0.030507	1.01325	2.00662	0.0889715	-1.6963	0.967638	2.06014	0.44284	1.50424	1.32041	1.26173	-0.606257	-1.90076	0.217942
175	TCGA-D3-A8GE-06A-21-A443-20	TCGA-D3-A8GE	SKCM	-	Metastatic	1.49562	3.1297	-0.168269	2.32338	-2.36657	1.03521	0.875332	-2.91591	1.79013	-0.908798	0.399974	-0.876756	0.37658	1.05112	-1.23933	-0.727067	-0.156858
176	TCGA-DA-A95V-06A-21-A444-20	TCGA-DA-A95V	SKCM	-	Metastatic	1.93648	4.44685	1.41156	-0.394691	-0.332093	1.61643	-0.0974104	1.54024	-1.75689	-0.289161	-0.614019	-0.741356	-0.685496	0.111173	0.278771	-0.279958	0.582648
177	TCGA-FS-A1ZJ-06A-21-A20N-20	TCGA-FS-A1ZJ	SKCM	-	Metastatic	1.53867	4.78312	-0.579774	0.484444	-1.1736	0.543067	1.18544	2.16096	1.4914	-0.362243	1.39505	1.62794	-2.56098	0.317917	-0.676298	-0.0648849	-0.532996
178	TCGA-EB-A5UL-06A-21-A443-20	TCGA-EB-A5UL	SKCM	-	Metastatic	1.78215	4.24543	0.271221	-0.76174	-0.77664	0.60314	0.417817	0.928093	-2.27427	0.714198	-0.542392	-1.05048	0.0335697	-0.160928	-0.527704	-0.370741	0.271943
179	TCGA-FS-A1ZZ-06A-21-A20N-20	TCGA-FS-A1ZZ	SKCM	-	Metastatic	0.252389	3.30378	0.515813	-0.529169	0.104037	0.807011	1.16245	0.967829	1.23405	-0.85525	0.485826	0.269932	-1.75241	0.586562	0.577941	0.850071	-0.341228
180	TCGA-FR-A3YN-06A-21-A241-20	TCGA-FR-A3YN	SKCM	-	Metastatic	1.54757	3.64406	0.596994	-0.667193	-1.63859	0.167259	0.269116	-0.6446	-1.34465	0.148751	-0.656475	-0.237656	-1.02524	-1.62074	-0.191468	0.611499	-0.103436
181	TCGA-EE-A2MU-06A-11-A20N-20	TCGA-EE-A2MU	SKCM	-	Metastatic	0.848289	4.65001	-0.0392429	0.391514	0.628539	1.21879	-0.817145	-0.613526	-1.68641	0.158933	-0.118447	-1.31676	-1.22036	-0.659476	-0.92491	-0.378862	0.243617
182	TCGA-FS-A1ZP-06A-21-A20N-20	TCGA-FS-A1ZP	SKCM	-	Metastatic	-0.105633	4.10827	-1.13758	0.805572	-0.0367378	-1.54251	0.809943	1.0445	0.048807	-0.428525	-1.0935	-0.650145	-0.489962	0.402221	0.175741	-0.778857	-0.289404
183	TCGA-FR-A7U9-06A-21-A444-20	TCGA-FR-A7U9	SKCM	-	Metastatic	0.396648	4.3019	-1.47284	1.81829	0.365574	-1.44945	1.36203	-0.639041	1.21874	-0.121212	-0.448826	-0.665034	-0.267283	-0.517865	-0.135245	0.190248	-0.0537427
184	TCGA-EE-A20C-06A-21-A20M-20	TCGA-EE-A20C	SKCM	-	Metastatic	0.546504	4.25613	-1.40391	1.63194	0.132048	-1.59288	-0.132019	-0.367352	0.433735	-0.383589	-1.36858	0.614455	-0.162203	-0.0280123	0.465465	0.335745	-0.696081
185	TCGA-DA-A95Z-06A-21-A444-20	TCGA-DA-A95Z	SKCM	-	Metastatic	0.935241	4.1898	0.919543	-0.0161811	0.977768	1.6129	-0.405166	-0.0203849	-0.435241	-0.210105	-0.187499	-0.75206	-0.724661	-0.139856	0.281265	0.538369	0.21106
186	TCGA-FS-A4F9-06A-21-A443-20	TCGA-FS-A4F9	SKCM	-	Metastatic	0.509869	4.037	-0.621764	0.721737	0.513695	-1.01427	0.273764	0.941323	-1.72945	0.637126	-1.18046	-1.44552	0.428002	-0.539139	-0.0734124	0.821268	0.510983
187	TCGA-EE-A29S-06A-21-A20M-20	TCGA-EE-A29S	SKCM	-	Metastatic	1.0151	2.56608	0.275885	0.90876	1.67822	-0.147532	1.13122	0.782724	0.0663888	0.305339	0.155542	-0.736329	0.536869	0.253589	-0.229551	-1.01301	0.45155
188	TCGA-ER-A19W-06A-31-A241-20	TCGA-ER-A19W	SKCM	-	Metastatic	0.648699	3.66329	0.83563	-0.609256	1.57861	1.71238	-0.879834	-0.0312592	-1.99599	0.618913	-1.08469	-1.29513	-0.00310192	-0.482743	0.470856	0.870143	-0.583882
189	TCGA-D9-A149-06A-21-A20M-20	TCGA-D9-A149	SKCM	-	Metastatic	0.53563	3.9373	0.0660021	-0.572451	-0.330877	-0.36475	0.931569	0.309507	-1.51775	0.0168401	-0.536589	-1.00267	0.246324	0.0948673	0.0462101	-0.293569	0.0442875
190	TCGA-D9-A6EC-06A-21-A444-20	TCGA-D9-A6EC	SKCM	-	Metastatic	1.23988	4.75598	3.73544	-3.62185	0.00884054	-0.17977	-3.88007	-0.312262	-1.73296	-2.13328	1.08369	0.346416	-0.0897386	1.01739	0.15011	-0.59172	0.245414
191	TCGA-FS-A1ZQ-06A-21-A20N-20	TCGA-FS-A1ZQ	SKCM	-	Metastatic	1.77578	3.99609	-0.759358	0.938369	-1.27695	0.308851	0.635778	-1.54273	-0.790984	0.601115	0.37982	-0.188553	-0.539576	-0.337631	-0.762822	-0.637691	-0.240822
192	TCGA-WE-A8ZO-06A-21-A444-20	TCGA-WE-A8ZO	SKCM	-	Metastatic	0.329099	3.96625	-0.290073	0.183041	0.541794	-0.51268	-0.0872915	0.107049	-1.68637	0.412768	-1.79831	-1.37656	1.27604	0.547808	0.201632	0.646491	-0.3604
193	TCGA-EE-A2GL-06A-21-A20M-20	TCGA-EE-A2GL	SKCM	-	Metastatic	0.332729	5.59493	-1.32971	0.969807	0.295771	-0.574194	-0.710404	-2.2672	0.562021	-0.0534271	-0.578838	-0.602338	-0.013175	-0.657762	-0.813341	0.350294	-0.614135
194	TCGA-D3-A8GK-06A-21-A443-20	TCGA-D3-A8GK	SKCM	-	Metastatic	-0.16027	4.7357	-0.589043	-0.509399	0.238126	-0.322842	0.360314	-0.11036	-1.40238	-0.432909	-0.703868	-0.604629	0.129664	-0.45968	0.18254	0.140074	-0.335027
195	TCGA-D3-A3ML-06A-21-A241-20	TCGA-D3-A3ML	SKCM	-	Metastatic	1.02129	4.06263	1.54132	-1.22812	-0.257579	-2.01162	-0.562403	1.44828	-1.83588	-0.924762	0.290624	0.611993	1.17168	0.331382	0.0701452	-0.707864	0.171466
196	TCGA-EE-A3JD-06A-21-A241-20	TCGA-EE-A3JD	SKCM	-	Metastatic	0.514655	3.49966	-0.380505	1.67162	0.278991	-0.0667117	0.0321913	0.54024	0.916634	-0.284425	0.0800887	0.0342341	0.275509	0.794395	1.19256	1.10444	0.288531
197	TCGA-D3-A1QB-06A-21-A20M-20	TCGA-D3-A1QB	SKCM	-	Metastatic	1.47276	5.19166	1.23713	-0.0961015	-0.682509	-0.290057	-0.132312	1.28999	-0.389918	-1.52004	1.54606	1.35147	-0.487203	0.0103557	-0.0550882	-0.977818	0.066315
198	TCGA-EE-A29G-06A-21-A20M-20	TCGA-EE-A29G	SKCM	-	Metastatic	-0.0450174	4.57893	-0.192085	-0.0482402	1.60727	1.5692	-0.722691	-1.92238	-1.24672	-0.0928123	0.46338	0.293792	0.544862	-1.03164	-0.349983	0.172113	-0.344681
199	TCGA-ER-A3ES-06A-21-A241-20	TCGA-ER-A3ES	SKCM	-	Metastatic	0.0336389	4.76008	-1.54664	1.19898	1.52908	-0.19514	0.749439	0.548215	0.542375	0.695575	0.606537	-0.66556	-0.718168	0.482491	-0.524975	0.827736	-0.595865
200	TCGA-EE-A2GR-06A-21-A20M-20	TCGA-EE-A2GR	SKCM	-	Metastatic	4.00805	1.12995	2.1372	-3.8556	-4.18812	1.22352	1.2719	0.186086	0.606424	0.869495	-0.204476	0.654219	0.309356	-1.08493	0.326024	0.441121	-1.25223
201	TCGA-EB-A299-01A-11-A20M-20	TCGA-EB-A299	SKCM	+	Primary	2.81784	4.8446	3.09516	-3.91243	-1.83747	-0.923983	-1.5147	-0.963983	-1.08685	-1.62683	1.89282	0.35175	-1.6146	0.163786	-0.0993535	0.535916	0.931684
202	TCGA-EB-A4IS-01A-11-A443-20	TCGA-EB-A4IS	SKCM	+	Primary	0.168235	3.54049	0.170571	0.999544	-0.100135	-0.839121	-0.308465	-0.384599	0.884485	-1.01275	-0.495046	0.180107	1.07572	-0.0164441	-0.617545	-0.976711	-0.801909
203	TCGA-GF-A2C7-01A-21-A20N-20	TCGA-GF-A2C7	SKCM	+	Primary	0.408012	4.15878	-1.08687	2.19699	0.240243	-0.294096	0.838666	-0.060231	1.31126	-0.234123	0.202507	-0.506282	0.0895841	0.208255	-0.706125	0.440914	0.935131
204	TCGA-EB-A431-01A-21-A443-20	TCGA-EB-A431	SKCM	+	Primary	2.16598	3.04956	2.2792	-2.85078	-0.157636	-3.04631	-1.87615	-0.232443	0.174478	0.0233596	0.648355	1.04504	-0.471997	1.02172	-0.507628	-1.01661	-0.914898
205	TCGA-XV-AAZV-01A-21-A444-20	TCGA-XV-AAZV	SKCM	+	Primary	1.17396	2.3469	0.836752	1.19284	0.789727	-0.0504889	0.186292	-0.124241	-0.0945218	0.306557	-0.186432	-0.870057	0.632002	0.891675	-0.367278	-0.630633	0.307282
206	TCGA-BF-A3DL-01A-21-A241-20	TCGA-BF-A3DL	SKCM	+	Primary	1.88946	1.17443	1.70802	-0.930882	-0.915424	-0.207011	-0.517308	-1.18898	0.0863979	0.863952	2.50175	0.04106	0.527726	1.80891	-1.32012	-0.0356328	0.593922
207	TCGA-EB-A550-01A-51-A444-20	TCGA-EB-A550	SKCM	+	Primary	1.33577	4.19392	1.49742	-0.974599	-0.947975	-1.75598	-1.31378	2.62789	0.0129736	-0.632479	0.124794	-0.0953676	-1.03003	0.96906	0.597936	0.778994	-0.0971293
208	TCGA-EB-A85I-01A-21-A443-20	TCGA-EB-A85I	SKCM	+	Primary	2.64694	1.49318	0.584005	-0.595397	-0.59572	2.05013	0.0491089	-1.96453	0.315034	2.43124	-0.392085	0.215482	1.41981	1.41085	-0.835401	-0.169517	0.469272
209	TCGA-BF-A3DJ-01A-21-A241-20	TCGA-BF-A3DJ	SKCM	+	Primary	0.970286	3.24433	-0.877047	0.532562	-0.0610777	2.03497	1.1006	-2.19187	-0.593289	0.356918	0.921826	0.442692	-0.110408	0.0206816	0.474722	0.264859	-0.299062
210	TCGA-EB-A553-01A-21-A443-20	TCGA-EB-A553	SKCM	+	Primary	0.984369	4.2374	0.269377	0.056069	-0.741558	2.11751	0.101725	-0.418394	-0.351039	-0.339723	0.281408	-0.0351121	0.094395	-1.03176	-0.176183	0.249719	-0.015697
211	TCGA-BF-A3DN-01A-21-A241-20	TCGA-BF-A3DN	SKCM	+	Primary	2.1024	2.18509	2.02976	0.333761	-2.61423	-2.44923	-1.98944	-1.05077	-0.286239	-1.21428	0.465203	-0.311774	-0.259566	1.52708	-0.456963	-1.46507	-0.879881
212	TCGA-BF-AAP7-01A-21-A443-20	TCGA-BF-AAP7	SKCM	+	Primary	0.43311	4.04814	-0.50468	1.20141	-0.617791	-0.204645	-0.131465	-1.0115	-0.106724	-0.821806	-0.0210977	-0.335058	-0.571607	1.16402	0.651855	-0.371842	0.455416
213	TCGA-XV-A9W5-01A-21-A444-20	TCGA-XV-A9W5	SKCM	+	Primary	2.07351	4.52103	0.0053518	1.85651	0.0859223	1.15124	-1.0816	-0.0868226	0.0129503	0.369833	0.872927	-0.769603	-0.52285	-0.0625635	1.14612	0.632073	0.210046
214	TCGA-EB-A6QZ-01A-21-A444-20	TCGA-EB-A6QZ	SKCM	+	Primary	1.19281	4.17388	-0.235326	0.36229	-0.315954	-0.00789827	-0.678343	-0.816651	1.15673	0.312168	0.0367376	0.27257	-0.0203798	0.945568	0.783953	0.282832	0.109067
215	TCGA-EB-A3Y6-01A-11-A241-20	TCGA-EB-A3Y6	SKCM	+	Primary	0.358582	4.64669	-0.545335	0.173707	0.443901	-2.16149	-0.511492	0.229169	0.315797	-0.15501	-1.00249	-0.712853	-0.28271	0.0839447	0.618454	0.259174	0.404706
216	TCGA-D3-A2JN-06A-21-A20M-20	TCGA-D3-A2JN	SKCM	+	Primary	1.75168	1.60319	1.60589	0.793906	-2.56062	-0.644912	-0.241345	-1.22389	-1.45067	-0.562631	0.413969	-2.00415	-0.109123	1.39558	0.0169317	-0.440529	0.0417093
217	TCGA-EE-A2M6-06A-21-A20M-20	TCGA-EE-A2M6	SKCM	+	Primary	1.06628	2.75991	0.352695	1.33502	-1.37062	-0.871166	0.529365	0.958606	1.93064	-0.483445	0.211489	-1.4635	-1.16762	1.26088	0.344862	0.512103	-0.124783
218	TCGA-D9-A148-06A-21-A20M-20	TCGA-D9-A148	SKCM	+	Primary	0.994176	4.85644	1.21412	-0.478034	-0.40887	-1.80834	-1.50979	-0.601341	-1.29105	-0.955939	0.0468075	-0.481947	-0.711781	0.657016	-0.388419	0.0843037	0.231444
219	TCGA-QB-A6FS-06A-21-A444-20	TCGA-QB-A6FS	SKCM	+	Primary	2.35855	3.32045	3.08201	-3.6834	0.269345	-1.41667	-2.61255	-0.901623	0.569444	1.34013	-1.01761	0.731134	0.720679	-0.078489	-0.844256	-0.456186	0.4879
220	TCGA-FS-A1ZD-06A-21-A20N-20	TCGA-FS-A1ZD	SKCM	+	Primary	1.08721	2.75577	0.966035	1.22588	-1.78906	-0.867986	-0.186592	0.343111	-1.00577	-0.747531	-1.12246	-1.73759	-0.254396	0.0575176	-0.61719	0.109543	0.373239
221	TCGA-GF-A6C8-06A-21-A444-20	TCGA-GF-A6C8	SKCM	+	Primary	-0.169042	3.25939	-0.437556	0.694015	-0.0536926	-2.1687	0.346113	-0.722271	0.460481	-0.804645	-0.597817	0.123316	0.987799	0.105893	-0.305562	-1.24447	-0.448391
222	TCGA-ER-A19J-06A-21-A20N-20	TCGA-ER-A19J	SKCM	+	Primary	3.02107	0.540846	2.49391	-1.62012	-3.9761	0.0369727	1.52024	-0.748044	0.225034	-0.192847	0.582643	-0.12284	0.698175	1.3512	0.234408	0.281837	-0.909826
223	TCGA-DA-A1I5-06A-21-A20M-20	TCGA-DA-A1I5	SKCM	+	Primary	4.1085	1.5029	3.721	-5.06481	1.07747	-0.788183	-2.69614	-1.26621	1.58339	1.67944	-1.0596	0.283168	-0.620459	-0.278186	2.06616	0.422131	0.346036
224	TCGA-D3-A8GS-06A-21-A443-20	TCGA-D3-A8GS	SKCM	+	Primary	2.11995	5.41522	0.101535	0.657714	-0.262352	0.546427	-0.549814	0.440964	1.47724	0.300689	0.109505	0.538651	0.115886	1.38554	1.36239	-0.344881	1.50276
225	TCGA-FS-A1ZC-06A-21-A20N-20	TCGA-FS-A1ZC	SKCM	+	Primary	0.443544	5.24076	1.22733	-1.53192	-0.406786	-1.48104	-0.209399	1.33166	-0.374723	-1.2458	0.915109	0.0291858	-1.05803	1.23281	-0.408986	0.0829398	0.337613
226	TCGA-D3-A51N-06A-21-A443-20	TCGA-D3-A51N	SKCM	+	Primary	0.576475	3.6546	1.14497	0.344684	-0.722241	-1.69658	-0.513504	0.733411	0.603653	-1.51734	0.802521	-0.802594	-0.556343	1.53017	0.447057	0.141283	-0.0490373
227	TCGA-D3-A2JP-06A-21-A20M-20	TCGA-D3-A2JP	SKCM	+	Primary	-0.455665	4.60555	-1.03821	0.405312	0.0334876	-1.57481	0.373818	-0.188777	0.805192	-0.863679	-0.570255	0.322763	-0.196628	-0.295173	0.0617239	0.992246	-0.918329
228	TCGA-WE-A8ZQ-06A-51-A444-20	TCGA-WE-A8ZQ	SKCM	+	Primary	-1.07097	4.49536	-1.75668	0.556391	0.394016	-1.53055	1.12539	1.41117	1.1877	-0.504859	0.0816956	0.406134	-1.87983	-0.401861	0.279411	0.35371	-0.588352
229	TCGA-GN-A4U7-06A-31-A443-20	TCGA-GN-A4U7	SKCM	+	Primary	-0.0751007	2.37569	-0.254918	2.06698	0.167008	-0.679264	0.11462	-0.569365	1.73405	-0.343826	-0.518101	-1.37725	1.13682	1.25314	0.538712	-0.443129	-0.932665
230	TCGA-EE-A3AD-06A-21-A20N-20	TCGA-EE-A3AD	SKCM	+	Primary	0.533515	3.16581	0.345952	1.60324	-0.0458662	0.164782	-0.405956	-0.724953	-0.588193	-0.408263	-0.460023	-1.56457	-0.0241644	0.130953	-0.558782	0.110829	-0.517533
231	TCGA-FR-A44A-06A-21-A443-20	TCGA-FR-A44A	SKCM	+	Primary	1.12726	2.90164	0.867727	2.07374	-1.52695	-0.498564	-0.882414	-0.84902	0.135844	-1.12525	0.390971	-1.70967	-0.280858	1.23977	-0.0692856	-0.150769	-1.14601
232	TCGA-XV-AB01-01A-21-A444-20	TCGA-XV-AB01	SKCM	+	Metastatic	1.21104	4.50778	-0.361492	1.26405	-1.81868	0.474166	0.727758	0.210863	-0.731806	-0.474024	0.256382	-0.280862	0.710833	0.194753	-0.56542	-0.142402	1.08452
233	TCGA-D9-A4Z2-01A-21-A443-20	TCGA-D9-A4Z2	SKCM	+	Metastatic	1.70326	4.21276	0.993389	-0.982482	-0.161088	-0.285081	-1.80998	-0.450943	-0.453407	0.982848	-0.954562	-0.546371	-0.489945	-1.2921	0.17041	0.832495	-0.0593686
234	TCGA-EB-A3XD-01A-11-A241-20	TCGA-EB-A3XD	SKCM	+	Metastatic	2.1024	3.98583	0.0325321	-0.308653	-2.82753	0.63055	1.94012	-0.0106284	0.154651	-0.0572041	0.580261	-0.0860866	-0.459372	-0.658006	-0.5383	0.513847	0.322778
235	TCGA-EB-A5FP-01A-21-A443-20	TCGA-EB-A5FP	SKCM	+	Metastatic	1.67169	4.38252	-0.272228	1.21483	-0.0256765	-0.082448	0.283601	-0.245185	-0.757142	0.818446	-0.80324	-0.144011	0.0924504	-0.727095	-0.43348	-0.0157453	-0.0864084
236	TCGA-EB-A5SE-01A-21-A444-20	TCGA-EB-A5SE	SKCM	+	Metastatic	0.688641	4.57089	-1.05932	0.683456	-0.209945	-0.656447	0.918379	1.03953	0.91241	0.869202	-0.173089	-0.207144	0.406021	-0.280668	-0.490235	0.563929	-0.567691
237	TCGA-EB-A3XE-01A-21-A241-20	TCGA-EB-A3XE	SKCM	+	Metastatic	0.63022	3.59374	-0.638859	1.38542	0.629331	-1.15583	0.554392	-0.602277	0.674942	0.51732	-0.216789	-0.468387	0.187439	0.181772	0.36941	-0.957963	-0.0635111
238	TCGA-D3-A1Q5-06A-21-A20M-20	TCGA-D3-A1Q5	SKCM	+	Metastatic	1.18207	4.0631	-0.265538	-0.104105	0.382114	1.83135	-0.567975	-0.305991	-1.28234	1.10405	0.215217	-0.370347	-0.095021	-0.883928	-0.911067	-0.275414	0.10836
239	TCGA-EE-A29T-06A-21-A20M-20	TCGA-EE-A29T	SKCM	+	Metastatic	-0.0556619	5.21524	-1.55225	0.907386	0.0786031	-2.91525	0.18733	-1.76655	2.10095	-0.850851	-0.879033	1.2321	0.28555	0.159362	0.181438	-0.402282	0.472497
240	TCGA-D3-A3MO-06A-21-A241-20	TCGA-D3-A3MO	SKCM	+	Metastatic	-0.33856	5.11591	-1.40342	1.12319	0.358413	-1.3349	-0.0917014	-1.42451	2.51268	-0.910417	-0.0667382	1.69623	0.135527	-1.95074	-1.53563	0.559506	-0.416651
241	TCGA-EE-A20F-06A-41-A20M-20	TCGA-EE-A20F	SKCM	+	Metastatic	1.13737	4.71541	-0.158719	0.34065	0.634029	2.83057	-0.344742	0.161447	0.574813	-0.0987196	0.546554	0.188452	0.496201	-0.628357	-1.20909	-0.639917	0.360173
242	TCGA-D3-A2JD-06A-21-A20M-20	TCGA-D3-A2JD	SKCM	+	Metastatic	1.14188	3.87463	1.40455	-0.917623	1.49153	0.304636	-0.0848308	1.7853	-0.0689727	-0.531577	0.695488	1.37694	0.0801458	0.579989	1.24203	0.00571709	-0.766028
243	TCGA-EE-A2MP-06A-21-A20N-20	TCGA-EE-A2MP	SKCM	+	Metastatic	0.738232	3.8058	-0.470666	1.75623	0.235856	0.146311	0.129694	-0.971546	2.08765	-0.319225	0.23282	0.738747	0.217883	1.06827	-0.0924326	-0.664512	0.0132798
244	TCGA-D3-A1Q4-06A-21-A20M-20	TCGA-D3-A1Q4	SKCM	+	Metastatic	1.20645	4.22856	-0.80732	0.902253	-0.419337	0.186653	0.0319523	-1.05209	0.0769904	0.518984	-0.543171	-0.366958	-0.0485244	-0.918826	-0.759378	0.751833	0.75024
245	TCGA-EE-A29P-06A-21-A20M-20	TCGA-EE-A29P	SKCM	+	Metastatic	1.68815	3.8223	0.871187	-0.790765	0.666498	1.55205	0.441651	2.56595	0.761185	0.477497	0.818877	0.329666	-1.28793	0.393154	1.28182	0.418843	-0.60533
246	TCGA-ER-A19S-06A-21-A215-20	TCGA-ER-A19S	SKCM	+	Metastatic	1.90792	3.95482	0.185763	-0.0740362	0.0462714	0.00392616	-0.166441	-0.251153	0.568847	0.542896	-0.0420185	0.0651187	0.0667948	-0.350843	0.93045	0.307857	0.380616
247	TCGA-D3-A1Q7-06A-21-A20M-20	TCGA-D3-A1Q7	SKCM	+	Metastatic	0.545344	3.05901	-0.834987	1.0189	1.71745	-1.29275	0.673778	0.361313	0.443194	0.808832	-0.13848	0.510583	1.03756	-0.359223	-0.164886	-0.224535	0.34387
248	TCGA-GN-A4U8-06A-22-A444-20	TCGA-GN-A4U8	SKCM	+	Metastatic	0.720667	3.97519	-0.341698	0.221581	0.278194	-0.511794	0.546141	0.0723611	0.473587	0.453427	-0.101743	0.028041	0.682148	-0.13865	0.569114	0.717356	0.639675
249	TCGA-D3-A1Q9-06A-21-A20M-20	TCGA-D3-A1Q9	SKCM	+	Metastatic	-0.250882	4.03062	0.145804	0.161204	1.96913	1.09532	-0.05026	0.237075	0.671062	-0.911055	0.51454	1.31819	1.96641	0.317808	0.444214	0.740966	-0.866722
250	TCGA-EE-A2M5-06A-21-A20M-20	TCGA-EE-A2M5	SKCM	+	Metastatic	0.437059	3.92905	-1.05632	0.977532	0.161307	0.909246	0.627489	-0.795734	-1.06223	0.456788	0.143058	-0.712198	0.181358	-0.757288	-1.08874	-0.378641	0.456625
251	TCGA-DA-A1I2-06A-31-A20M-20	TCGA-DA-A1I2	SKCM	+	Metastatic	1.31036	5.36886	2.37008	-1.90442	-0.894879	-1.01602	-2.80029	1.36072	-2.38446	-1.13815	0.28899	-0.063531	-1.54645	0.346762	-0.401451	-0.612079	1.28061
252	TCGA-EE-A2A6-06A-21-A20M-20	TCGA-EE-A2A6	SKCM	+	Metastatic	0.266543	3.54502	-0.951221	1.34484	0.525021	-0.76956	0.471858	0.152368	-0.798874	0.667155	-1.26525	-1.12988	1.00215	-0.125499	0.379635	0.651756	0.0472508
253	TCGA-ER-A198-06A-21-A20N-20	TCGA-ER-A198	SKCM	+	Metastatic	0.520747	4.24365	-1.2602	-0.169429	1.84128	2.05746	0.0702667	-0.898261	1.43544	0.417239	0.329069	0.540224	1.13332	1.17906	1.39574	-2.01956	-0.442394
254	TCGA-D3-A8GN-06A-21-A443-20	TCGA-D3-A8GN	SKCM	+	Metastatic	2.21942	4.61839	-0.658745	-0.0346917	-2.15454	2.12581	1.25108	1.19612	-0.760565	0.616447	0.0910363	0.0649047	0.32658	-0.288974	-0.200522	-0.595825	0.115023
255	TCGA-LH-A9QB-06A-21-A444-20	TCGA-LH-A9QB	SKCM	+	Metastatic	2.01333	3.9976	2.21318	-2.64789	-0.0300061	-1.45383	-0.947339	-0.0156896	2.48594	1.11899	0.273112	0.83815	-1.47812	-0.129143	-1.68796	-0.316422	2.0164
256	TCGA-D3-A3C3-06A-21-A20M-20	TCGA-D3-A3C3	SKCM	+	Metastatic	0.299456	3.16577	1.34147	-2.01864	-0.941662	3.08669	0.943428	0.299614	-0.0398163	-1.65735	1.23345	0.716261	0.303611	-0.26648	0.29205	0.330471	0.467723
257	TCGA-DA-A95W-06A-21-A444-20	TCGA-DA-A95W	SKCM	+	Metastatic	0.920613	3.62147	-0.274213	0.90504	-1.52336	0.47459	0.270791	-0.733992	-1.73123	0.057566	-0.394808	-0.810297	-0.100571	-0.0341749	-0.167334	-0.364529	0.00825075
258	TCGA-GN-A265-06A-11-A20N-20	TCGA-GN-A265	SKCM	+	Metastatic	0.221274	3.8603	-1.43775	0.760704	0.928565	-0.999052	0.803423	-0.165796	1.28133	0.508011	0.63941	0.760516	0.273736	0.12414	-0.113245	0.146682	0.537988
259	TCGA-EE-A29E-06A-21-A20M-20	TCGA-EE-A29E	SKCM	+	Metastatic	-0.128284	4.21733	0.205542	0.378572	0.964973	-0.33457	0.831696	1.7946	1.06865	-0.920459	0.0176034	-0.562959	1.27295	-0.0079066	0.121643	-0.60192	-0.0420158
260	TCGA-D3-A8GV-06A-21-A443-20	TCGA-D3-A8GV	SKCM	+	Metastatic	1.34656	2.95397	0.461959	-0.995072	0.0438915	2.03724	0.362384	-1.39013	-0.845486	0.534825	-0.191849	-0.621239	-0.150953	-0.65801	-0.467465	0.81736	-0.308151
261	TCGA-BF-AAP0-06A-21-A443-20	TCGA-BF-AAP0	SKCM	+	Metastatic	1.35547	4.46978	0.426903	-0.254154	0.297661	-0.918754	-0.376708	0.93804	-0.117731	0.433346	0.293589	-0.29721	-0.443548	0.139533	0.0216873	0.859213	0.770825
262	TCGA-D9-A1JX-06A-21-A20M-20	TCGA-D9-A1JX	SKCM	+	Metastatic	-0.247198	3.61739	-1.96898	-0.0527975	0.845498	-0.279096	0.182101	-0.526112	-1.20854	1.17184	-1.29937	0.8366	1.70863	0.414292	0.358283	-0.356847	-0.914173
263	TCGA-YD-A9TB-06A-21-A443-20	TCGA-YD-A9TB	SKCM	+	Metastatic	-0.0289774	4.74849	-1.56903	1.21992	-0.835242	-2.22248	0.659436	0.357327	1.98885	0.254161	-0.0541568	-0.618051	-0.157698	0.388682	-0.601052	-0.286607	-0.325334
264	TCGA-EE-A3J3-06A-21-A241-20	TCGA-EE-A3J3	SKCM	+	Metastatic	-0.512147	4.8646	-1.44718	-0.464553	1.14205	-1.04648	0.052669	0.107409	0.618624	-0.206687	0.660554	1.90937	2.00058	0.290578	0.223679	0.126685	-0.135948
265	TCGA-DA-A1I4-06A-21-A20M-20	TCGA-DA-A1I4	SKCM	+	Metastatic	0.682335	5.08718	0.0744087	0.0186043	-0.294838	-1.80455	-1.30407	-0.315462	-1.31599	-0.50225	-1.44375	0.681222	0.648707	-0.0752501	-1.27083	-1.23247	-0.447234
266	TCGA-EE-A3AG-06A-21-A20N-20	TCGA-EE-A3AG	SKCM	+	Metastatic	1.4595	3.39322	0.171814	2.08238	-1.14017	1.23913	1.27232	-1.02851	1.46669	-0.980695	0.718302	-0.920558	-1.3558	-0.0839058	-1.20429	-0.062675	-0.220039
267	TCGA-DA-A3F5-06A-21-A241-20	TCGA-DA-A3F5	SKCM	+	Metastatic	1.99165	3.09815	0.954774	-1.51723	-1.50329	-0.437663	-0.383228	0.812005	0.219598	0.901762	-1.24876	-0.445811	1.79466	0.388972	1.11067	0.743795	-0.991338
268	TCGA-ER-A19M-06A-51-A241-20	TCGA-ER-A19M	SKCM	+	Metastatic	1.21235	2.93706	-0.598806	0.616457	-2.3567	0.0984888	1.85699	-0.105801	-1.11376	0.435132	-0.429419	-0.569534	1.35533	-0.163893	-0.0459749	-0.0762529	-0.235154
269	TCGA-DA-A1I8-06A-21-A20M-20	TCGA-DA-A1I8	SKCM	+	Metastatic	3.54025	3.04297	1.87873	-2.9033	-0.197342	-0.0416627	-2.0019	1.22875	0.300388	1.91544	-1.33569	0.494812	0.109204	-0.445846	1.3468	0.144464	-0.331273
270	TCGA-EE-A2GS-06A-21-A20M-20	TCGA-EE-A2GS	SKCM	+	Metastatic	1.65907	4.00236	0.787296	-0.84074	-0.372409	-0.255865	-1.16684	0.74839	-1.5554	0.705719	-1.23532	-0.453797	-0.417823	-0.676334	-0.0272523	0.39597	-0.205782
271	TCGA-EE-A2GH-06A-21-A20M-20	TCGA-EE-A2GH	SKCM	+	Metastatic	-0.22709	4.5628	-1.81801	0.302841	0.951489	-1.74255	-0.500999	-1.9096	0.650131	-0.0458512	-0.533107	1.11026	-0.0850788	-0.661656	-0.037757	-0.669754	-0.228534
272	TCGA-D3-A3MR-06A-21-A241-20	TCGA-D3-A3MR	SKCM	+	Metastatic	0.91462	4.43972	-0.134822	0.302174	-0.753848	-0.783235	0.730973	1.92468	0.937012	0.0649114	-0.799174	-0.786684	-0.592533	0.502808	0.472072	1.55937	0.194775
273	TCGA-ER-A19O-06A-21-A20N-20	TCGA-ER-A19O	SKCM	+	Metastatic	0.200588	4.01485	0.0914119	-0.608024	-0.578186	-0.313815	2.54957	1.26728	1.11554	-1.06289	1.30725	0.262788	-1.49177	0.349037	0.215565	0.984659	-0.950045
274	TCGA-D3-A5GN-06A-21-A444-20	TCGA-D3-A5GN	SKCM	+	Metastatic	1.2405	4.00042	0.691665	0.127826	0.666853	1.82769	0.401169	0.193924	-1.66835	0.0744828	-0.121254	-1.9966	-0.572989	0.214587	-0.182716	0.212205	0.274127
275	TCGA-WE-A8ZR-06A-21-A444-20	TCGA-WE-A8ZR	SKCM	+	Metastatic	-0.362305	3.71912	-1.00427	0.135116	1.43081	-1.17558	-0.18586	-0.264763	-0.338506	-0.00307204	-1.28027	-0.0121447	-0.572869	-0.574608	-0.21479	1.27197	-0.774322
276	TCGA-D9-A6E9-06A-21-A444-20	TCGA-D9-A6E9	SKCM	+	Metastatic	-0.107237	4.55919	-1.3251	0.974954	0.16406	-1.27132	-0.373106	-1.40431	0.233411	0.0396481	-0.506726	-0.566663	0.0959842	-0.674432	0.339239	0.605391	0.624472
277	TCGA-WE-AAA4-06A-21-A444-20	TCGA-WE-AAA4	SKCM	+	Metastatic	1.35558	4.43006	0.767324	-0.693887	0.765105	1.70763	-1.28237	0.594583	-1.86402	0.216172	-0.457759	-0.675187	-0.490789	0.32581	-0.011496	-0.625443	0.664137
278	TCGA-ER-A19C-06A-21-A20N-20	TCGA-ER-A19C	SKCM	+	Metastatic	0.689125	4.30364	0.21963	0.79804	0.043404	0.878963	0.929793	2.82366	1.10626	-0.663245	0.882165	-0.183617	-0.407029	1.43639	0.057975	-0.41533	-0.0475889
279	TCGA-HR-A5NC-01A-21-A444-20	TCGA-HR-A5NC	SKCM	+	Metastatic	1.04269	4.69306	1.18535	-1.33364	-0.462645	-2.32315	-1.69808	-0.415082	0.186876	-1.04602	0.153566	0.308771	0.178483	0.479727	1.05685	-0.767002	0.195491
280	TCGA-BF-A5EQ-01A-41-A443-20	TCGA-BF-A5EQ	SKCM	+	Metastatic	-0.122311	4.85331	0.290253	-0.458563	1.11701	0.666989	-0.474479	-0.852788	0.511322	-1.0846	-0.151512	-0.24667	0.617116	0.504135	0.561692	0.589439	0.0893881
281	TCGA-EB-A3HV-01A-21-A241-20	TCGA-EB-A3HV	SKCM	+	Metastatic	0.893792	4.35304	-0.582398	0.314759	-1.17302	-0.356814	0.238683	-0.679569	-1.339	-0.148978	-0.511397	-0.588577	-0.986058	-0.425887	-0.149885	0.68856	0.109819
282	TCGA-FR-A728-01A-21-A444-20	TCGA-FR-A728	SKCM	+	Metastatic	2.58934	2.96478	2.85046	-2.5319	-0.145434	-1.46223	-2.2158	-2.03306	1.09794	-0.369613	0.280693	0.353952	-0.270392	-0.455609	1.62983	-0.696888	-0.0153381
283	TCGA-FS-A1ZN-01A-21-A20N-20	TCGA-FS-A1ZN	SKCM	+	Metastatic	0.0682604	5.40329	-1.57353	0.354526	0.400822	-1.83357	1.47979	1.66872	0.876778	0.62835	-1.92177	-1.15593	-1.56126	0.353741	-0.257517	1.96555	0.741841
284	TCGA-BF-A5ER-01A-21-A443-20	TCGA-BF-A5ER	SKCM	+	Metastatic	1.23009	4.30066	-0.428743	0.222128	-0.920653	0.42995	0.899911	0.371162	0.60947	0.602219	-0.408461	-0.193533	-0.0762903	-0.112139	-0.126314	0.346767	-0.988327
285	TCGA-GN-A263-01A-21-A20N-20	TCGA-GN-A263	SKCM	+	Metastatic	1.27392	3.46803	-0.321927	0.824704	0.457755	2.74672	0.658375	-1.63492	-0.257875	-0.0152766	0.3957	-0.0521853	0.432777	0.672069	0.544417	-0.250573	-0.0597788
286	TCGA-EB-A6QY-01A-21-A444-20	TCGA-EB-A6QY	SKCM	+	Metastatic	0.384009	3.5947	-0.638311	1.16723	0.277979	0.387454	-0.142451	0.317092	1.0227	0.0219934	-0.730064	-0.00387065	1.27267	0.376775	0.593053	0.414826	-0.18036
287	TCGA-EB-A44P-01A-21-A443-20	TCGA-EB-A44P	SKCM	+	Metastatic	0.797665	4.7571	0.346233	-0.461597	0.545617	0.594348	-1.46878	0.357648	-2.47049	0.355822	-2.74367	-0.324466	1.36389	-0.841211	-0.162644	0.226934	-0.488361
288	TCGA-EB-A44N-01A-21-A443-20	TCGA-EB-A44N	SKCM	+	Metastatic	1.51013	5.13477	0.147898	0.338736	-2.32782	2.05052	1.52228	0.97115	-0.12699	-1.87571	1.94942	0.664189	-1.27288	-0.353203	-0.368622	0.0231707	0.0938303
289	TCGA-HR-A2OH-01A-21-A20N-20	TCGA-HR-A2OH	SKCM	+	Metastatic	1.92482	5.18112	1.0868	0.320187	-1.43113	-0.133559	-0.99851	0.517404	-0.0635365	-0.979934	0.553316	-0.88045	-1.30512	0.215353	0.287523	0.114471	1.61912
290	TCGA-GN-A269-01A-21-A20N-20	TCGA-GN-A269	SKCM	+	Metastatic	0.00265368	4.11533	0.663128	-0.575181	1.75815	2.54836	0.0396082	2.61979	1.12921	-1.20683	1.41197	-0.352863	-0.481615	0.900227	0.91934	-0.298487	-0.523278
291	TCGA-EB-A3XF-01A-41-A241-20	TCGA-EB-A3XF	SKCM	+	Metastatic	1.3553	4.13124	0.31092	0.0825171	0.21161	1.55507	-0.439886	-1.99711	-0.658073	-0.417587	0.229176	-0.561558	-0.624062	0.682436	0.762666	-0.68436	1.58091
292	TCGA-EB-A3XB-01A-21-A241-20	TCGA-EB-A3XB	SKCM	+	Metastatic	1.87153	4.44785	1.91376	-2.24895	-0.616422	-0.82373	-2.34411	-0.98722	-0.286193	-0.564889	0.84564	0.766743	0.105296	0.303901	0.201908	-0.927396	-0.149186
293	TCGA-EB-A24C-01A-21-A20M-20	TCGA-EB-A24C	SKCM	+	Metastatic	0.280028	4.17427	0.52543	-1.20225	1.05256	2.84242	-0.243185	-0.488142	-1.10143	-0.779313	0.948993	1.29323	1.13166	-0.682959	0.140766	0.0851907	-0.819742
294	TCGA-XV-AAZW-01A-21-A444-20	TCGA-XV-AAZW	SKCM	+	Metastatic	-0.579176	4.86588	1.04031	-0.744347	1.79932	2.32014	-0.870836	0.153563	1.97158	-2.06843	1.2745	1.0374	-1.59316	-0.186519	0.141793	-0.25209	-0.120795
295	TCGA-EB-A6R0-01A-21-A444-20	TCGA-EB-A6R0	SKCM	+	Metastatic	0.464524	4.99079	0.45233	-0.563069	0.728803	2.44619	-0.721555	1.93937	1.09309	-0.672897	0.718925	0.608773	-1.48683	-0.424287	0.142514	-0.0275764	-0.339952
296	TCGA-ER-A19K-01A-41-A20N-20	TCGA-ER-A19K	SKCM	+	Metastatic	0.500564	3.56188	2.33745	-2.50367	-0.563967	-2.39697	-1.60492	0.854293	-1.49355	-1.50239	0.85207	1.62224	0.608546	0.792663	0.0491969	-0.428978	-0.382922
297	TCGA-BF-AAP6-01A-21-A443-20	TCGA-BF-AAP6	SKCM	+	Metastatic	1.4941	4.03123	2.27645	-3.36073	0.828212	-1.33758	-2.22481	-0.714591	-0.644833	1.04274	-0.196318	0.609202	-0.14703	0.685365	-1.17284	-0.066278	0.593828
298	TCGA-BF-A3DM-01A-21-A241-20	TCGA-BF-A3DM	SKCM	+	Metastatic	0.0273851	4.93188	-1.28232	0.364435	-0.07797	-1.19979	0.827942	-0.0582503	0.420445	-0.3059	0.0172064	-0.262296	-0.275719	0.773518	-0.0218419	-0.261499	-0.577902
299	TCGA-IH-A3EA-01A-21-A241-20	TCGA-IH-A3EA	SKCM	+	Metastatic	0.82877	3.17165	0.988432	-1.01848	0.130301	-1.50538	-1.55198	0.321458	0.95052	0.380915	-1.02595	-0.04177	-0.93975	-0.305996	0.13495	0.905962	-0.771447
300	TCGA-EB-A42Z-01A-21-A443-20	TCGA-EB-A42Z	SKCM	+	Metastatic	0.528882	4.84488	0.555885	-0.804713	0.313131	0.380612	-0.420844	1.05221	0.563947	-0.831883	1.23138	0.639571	0.0697708	0.605991	0.271366	-0.750216	-0.0578061
301	TCGA-EB-A430-01A-21-A443-20	TCGA-EB-A430	SKCM	+	Metastatic	1.1366	3.71019	0.410116	0.100465	0.778916	1.4015	-0.507054	-0.542163	-2.24799	0.653497	-0.210587	-1.24507	0.418174	0.342613	-0.304868	0.372441	0.318907
302	TCGA-BF-A1PU-01A-21-A20M-20	TCGA-BF-A1PU	SKCM	+	Metastatic	0.302506	4.72035	-0.0493685	-0.420551	1.53325	0.987959	0.969957	1.03051	1.18677	-0.400726	0.518365	-0.747601	0.0330882	1.54663	0.740261	0.251248	-0.620499
303	TCGA-D3-A51F-06A-21-A444-20	TCGA-D3-A51F	SKCM	+	Metastatic	1.80505	4.49921	-0.451347	0.744625	-0.915306	0.208185	0.317736	0.301537	-1.57761	1.23022	-0.452042	-0.923212	-0.701083	-0.617638	-0.917992	0.0514647	0.0553763
304	TCGA-GF-A4EO-06A-21-A443-20	TCGA-GF-A4EO	SKCM	+	Metastatic	0.0401002	4.35606	-1.60623	1.11997	0.229524	-0.240106	1.10469	0.00147698	1.34759	0.342211	0.234896	0.0126439	-1.85267	-0.0880786	-1.05206	0.35859	0.096437
305	TCGA-OD-A75X-06A-21-A443-20	TCGA-OD-A75X	SKCM	+	Metastatic	0.416384	4.23456	-0.847297	1.09	-0.81491	0.326226	0.550192	-1.15307	-1.04994	0.141659	-0.351961	-0.912244	0.106428	-0.914787	-1.23254	-0.603834	-0.221929
306	TCGA-FW-A3TV-06A-21-A241-20	TCGA-FW-A3TV	SKCM	+	Metastatic	2.26173	4.36215	0.825865	-1.14091	-2.29037	1.19139	-0.0972063	0.223172	-1.13751	-0.120647	0.0859132	0.27952	-1.24031	-0.759432	-0.575552	-0.18818	-0.205659
307	TCGA-ER-A2ND-06A-21-A20N-20	TCGA-ER-A2ND	SKCM	+	Metastatic	1.67782	4.16607	-0.769164	-0.523819	1.31282	0.787464	0.584914	-0.538076	0.724686	1.60351	-0.269189	0.305615	-0.340919	1.09899	0.576492	-0.410581	-0.831641
308	TCGA-W3-AA1Q-06A-21-A444-20	TCGA-W3-AA1Q	SKCM	+	Metastatic	1.35247	3.4659	1.81138	-2.67017	1.62987	1.98034	-0.565381	0.966522	1.73772	0.391635	-0.0396395	0.864368	-0.738834	0.0799239	0.911175	0.494712	-0.938809
309	TCGA-ER-A42L-06A-21-A444-20	TCGA-ER-A42L	SKCM	+	Metastatic	4.47381	1.90839	2.23546	-3.08209	-2.89019	-0.153893	0.055183	0.850799	0.367601	2.12901	-0.0633567	1.255	0.0822142	-0.977144	-0.11197	-0.295917	-1.04323
310	TCGA-ER-A19Q-06A-21-A215-20	TCGA-ER-A19Q	SKCM	+	Metastatic	0.758169	3.37346	0.00426206	0.696208	0.249742	0.499687	0.848804	1.46844	-0.914811	0.224749	-0.472702	-0.97345	0.594471	0.336969	0.044631	-0.797671	0.0505994
311	TCGA-D3-A3CB-06A-21-A20M-20	TCGA-D3-A3CB	SKCM	+	Metastatic	0.271405	4.14824	0.504439	-0.956679	2.16625	1.90235	-0.325873	-0.529174	0.646737	-0.156953	-0.477373	0.358732	0.271697	-0.160257	0.0635779	0.619175	-0.232302
312	TCGA-D3-A1Q6-06A-21-A20M-20	TCGA-D3-A1Q6	SKCM	+	Metastatic	-0.520554	3.42893	-1.53804	0.897473	1.35214	-0.851235	0.287605	-0.915198	0.127815	0.773363	-0.259274	0.053623	1.39988	-0.444456	0.533961	1.04369	0.133629
313	TCGA-ER-A3PL-06A-21-A241-20	TCGA-ER-A3PL	SKCM	+	Metastatic	0.183258	5.6011	-1.34376	1.11836	0.0455158	0.184014	0.787745	1.8599	0.787585	-0.520695	0.015371	0.700368	-0.0366345	-0.28259	-0.965084	-0.233242	0.0107632
314	TCGA-DA-A1HY-06A-21-A20M-20	TCGA-DA-A1HY	SKCM	+	Metastatic	0.212603	5.50322	-0.347142	0.0524608	1.2331	0.151898	-0.434025	0.56591	-0.737146	-0.947749	-0.323645	0.583749	-0.281737	-0.741864	0.0994463	-0.808452	0.281147
315	TCGA-DA-A1I0-06A-21-A241-20	TCGA-DA-A1I0	SKCM	+	Metastatic	1.23499	3.73321	0.155363	0.0143438	-1.32522	-0.185223	0.645291	-2.3192	0.296707	-0.62349	-0.0922622	0.244969	0.314235	-1.69953	-0.499249	0.439833	0.611654
316	TCGA-ER-A19H-06A-21-A20N-20	TCGA-ER-A19H	SKCM	+	Metastatic	0.811561	3.65141	0.814349	-0.440622	0.682197	2.05481	-0.280126	2.5788	1.48778	0.0933161	-0.0654385	0.576996	-1.01684	0.11748	0.547939	0.599117	-0.541241
317	TCGA-ER-A2NG-06A-21-A20N-20	TCGA-ER-A2NG	SKCM	+	Metastatic	-0.350927	5.60662	-0.678723	0.249062	0.763949	-1.47426	1.26844	2.86845	0.925898	-1.03445	-0.565443	0.0531395	-1.19349	-0.0398591	-0.517696	-0.469148	-0.69632
318	TCGA-WE-A8K6-06A-21-A443-20	TCGA-WE-A8K6	SKCM	+	Metastatic	0.643227	3.93066	-0.891788	1.08943	1.29842	2.286	0.376267	-0.2457	1.16612	0.0906412	1.44227	-0.0165644	-0.187567	0.0360733	-0.130536	0.743346	-0.745909
319	TCGA-D3-A3C1-06A-21-A20M-20	TCGA-D3-A3C1	SKCM	+	Metastatic	1.21268	4.02804	-0.330329	0.128937	0.101213	-0.541953	-0.943416	-2.1456	-0.456326	0.495896	-0.182783	0.691393	0.696595	0.392236	-0.576867	-0.00849868	-0.360759
320	TCGA-ER-A42K-06A-21-A444-20	TCGA-ER-A42K	SKCM	+	Metastatic	1.47117	4.6361	0.817215	-1.20357	-2.01723	2.31474	0.70081	0.421507	-1.34204	-1.07533	-0.162604	0.281499	-0.554812	-0.947614	-0.404164	0.344488	-0.129421
321	TCGA-EE-A2GT-06A-21-A20M-20	TCGA-EE-A2GT	SKCM	+	Metastatic	1.3718	5.19645	0.405074	-0.901245	1.65388	0.68538	-1.13164	-0.0502741	-0.908474	1.2547	-0.840004	-0.881423	0.284079	0.36439	0.309884	-0.506243	-0.335471
322	TCGA-D3-A2JE-06A-21-A443-20	TCGA-D3-A2JE	SKCM	+	Metastatic	-0.394797	4.40525	0.859077	-0.349233	2.16836	2.5935	-0.057368	1.36268	1.42196	-1.44976	0.594966	1.92948	-0.481325	-0.00895698	0.330163	0.0241099	-0.75836
323	TCGA-EE-A3AB-06A-21-A20N-20	TCGA-EE-A3AB	SKCM	+	Metastatic	1.64115	4.13391	1.89291	-1.94667	0.890349	2.37135	-0.547317	0.981498	-0.549901	0.279631	-0.111299	-0.775239	-0.0981479	0.0322863	0.364265	-0.389532	0.127968
324	TCGA-D3-A8GB-06A-21-A443-20	TCGA-D3-A8GB	SKCM	+	Metastatic	0.50698	5.7481	0.288686	-0.19653	-0.756409	0.475152	0.862709	0.580907	-0.45932	-1.51522	1.17194	-0.190885	-0.47947	-0.0600085	-1.15517	0.174526	0.729275
325	TCGA-FS-A1ZM-06A-21-A20N-20	TCGA-FS-A1ZM	SKCM	+	Metastatic	0.532247	4.49922	-0.401224	0.758953	-0.0406846	-0.254562	1.28593	1.46915	1.4763	-0.480767	0.59264	-0.332992	-1.0222	0.824926	-0.154128	0.036533	0.673389
326	TCGA-D3-A8GD-06A-21-A443-20	TCGA-D3-A8GD	SKCM	+	Metastatic	0.461464	5.26996	0.442629	0.661824	-0.210566	-1.7303	-0.0798538	2.75139	-1.11474	-1.13162	-0.567983	-0.0466059	-0.169157	-0.276927	0.177579	0.623536	0.126371
327	TCGA-ER-A19B-06A-21-A20N-20	TCGA-ER-A19B	SKCM	+	Metastatic	0.516149	3.74884	-0.230366	0.293692	-0.368867	-0.132176	0.237712	-1.00834	-0.29342	-0.250162	-0.0786443	0.745934	0.396487	-0.137362	0.147153	-0.24024	-0.0224448
328	TCGA-EE-A2M8-06A-21-A20M-20	TCGA-EE-A2M8	SKCM	+	Metastatic	0.909932	4.43238	-1.01092	2.42682	-0.676766	-1.1179	0.237674	-1.38926	1.59269	-0.237735	-0.154646	0.198712	-0.312809	-0.719377	-1.08433	-0.234081	0.252049
329	TCGA-EE-A29M-06A-21-A20M-20	TCGA-EE-A29M	SKCM	+	Metastatic	0.336815	3.63436	-0.318759	0.800382	1.37674	0.369369	-0.0142746	-0.457378	-0.74305	0.359299	-0.712887	-1.00188	0.411372	-0.602166	-0.375545	0.0127096	0.651611
330	TCGA-D3-A3CE-06A-21-A20M-20	TCGA-D3-A3CE	SKCM	+	Metastatic	0.742969	4.63794	-0.69727	0.89573	0.00236225	0.839385	0.412459	1.25861	-1.75476	0.292732	-1.0166	-1.16781	0.0888669	-0.0285178	-0.36499	-0.895692	0.584109
331	TCGA-ER-A19E-06A-21-A20N-20	TCGA-ER-A19E	SKCM	+	Metastatic	-0.145552	3.99347	-1.63401	0.721642	0.449528	-1.54424	1.25225	-0.609701	2.11108	0.350012	0.736811	0.254113	-2.13655	0.208126	-1.25705	0.255366	-1.274
332	TCGA-EE-A29C-06A-31-A20M-20	TCGA-EE-A29C	SKCM	+	Metastatic	-0.482377	5.21403	-1.65903	1.10676	-0.0192472	-2.05534	1.65823	3.04041	1.64536	-0.310697	0.664786	-0.90819	-1.37213	0.595624	-0.55163	-0.249892	-0.251062
333	TCGA-FW-A5DY-06A-21-A443-20	TCGA-FW-A5DY	SKCM	+	Metastatic	0.811934	4.54897	0.106855	0.790558	-0.292376	0.130036	0.451968	2.12165	0.533957	-0.460967	0.58278	-1.4282	-0.0221852	0.504689	0.591969	-0.716764	0.617196
334	TCGA-WE-A8K5-06A-21-A443-20	TCGA-WE-A8K5	SKCM	+	Metastatic	0.809172	3.74809	-0.337329	0.368635	0.532019	-0.225548	-0.233552	0.425086	-0.223948	1.37061	-1.03463	-0.450776	-0.0347972	-0.475419	-0.256523	1.10367	-0.335579
335	TCGA-EE-A29H-06A-21-A20M-20	TCGA-EE-A29H	SKCM	+	Metastatic	1.17624	3.35619	0.160643	0.0420383	0.388295	-0.289813	-0.635368	0.940304	-0.704082	1.1209	-0.773206	-1.71811	-0.933096	-0.523483	0.425027	2.61583	-0.556085
336	TCGA-FS-A1ZH-06A-21-A20N-20	TCGA-FS-A1ZH	SKCM	+	Metastatic	1.78607	4.32887	0.0864873	0.327354	-0.900911	-2.59546	-0.78751	-0.845304	0.132573	-0.337523	-0.634106	-0.162762	0.647003	0.902358	2.30524	1.26228	0.94457
337	TCGA-GN-A26A-06A-21-A20N-20	TCGA-GN-A26A	SKCM	+	Metastatic	1.81936	3.79464	-0.0239827	0.659515	1.07133	2.04129	0.24896	0.65059	-0.341523	1.29127	0.48151	-0.964263	-0.21013	0.538711	0.755941	0.769564	0.0191794
338	TCGA-FR-A729-06A-21-A444-20	TCGA-FR-A729	SKCM	+	Metastatic	2.21957	2.52742	1.74888	-2.34358	-1.76014	2.93757	1.74868	0.498298	0.823828	-0.181099	0.490938	1.05126	0.968378	0.561498	0.93217	0.637602	-0.845651
339	TCGA-GN-A262-06A-21-A20N-20	TCGA-GN-A262	SKCM	+	Metastatic	0.704964	3.90787	-0.346385	0.687295	-0.468147	-0.159233	-0.116204	-1.62955	-0.499619	0.442738	-0.499821	-1.15782	-0.222204	-0.665593	-1.06746	-0.327943	-0.424219
340	TCGA-WE-A8ZT-06A-21-A444-20	TCGA-WE-A8ZT	SKCM	+	Metastatic	1.19473	3.12041	-1.17966	1.16493	-0.119509	-0.498382	0.83392	0.789559	-1.39123	1.3287	-1.05494	-0.993038	0.418793	-0.0192017	-0.360327	0.196677	-0.448999
341	TCGA-FR-A8YE-06A-21-A444-20	TCGA-FR-A8YE	SKCM	+	Metastatic	0.0560507	5.22216	-1.70578	1.10079	1.27919	-1.39037	-0.60576	-1.32724	-0.618031	0.474616	-1.14031	-0.279413	-0.0997409	0.407936	0.761875	0.128639	0.093386
342	TCGA-EE-A2MK-06A-21-A20N-20	TCGA-EE-A2MK	SKCM	+	Metastatic	0.352142	5.22407	1.01115	-0.469412	1.97854	3.47867	-1.49096	-1.59051	-0.980458	-1.49132	1.25261	-0.105354	-0.229961	-0.0359391	-0.427744	-0.707085	0.0541574
343	TCGA-EE-A29W-06A-21-A20M-20	TCGA-EE-A29W	SKCM	+	Metastatic	-0.429922	4.88634	0.0964736	-0.736423	0.52564	1.08976	0.730284	1.56333	0.101925	-1.29008	0.183512	0.142277	0.0282125	-0.484644	0.270676	-0.164821	-0.393135
344	TCGA-DA-A1HW-06A-21-A20M-20	TCGA-DA-A1HW	SKCM	+	Metastatic	0.130222	4.69562	-0.961224	0.705117	0.889788	-1.38888	-0.0502028	-0.484947	0.935985	0.256904	-1.02565	0.0403868	0.721693	0.305657	0.767332	-0.514081	-0.633904
345	TCGA-ER-A19P-06A-21-A20N-20	TCGA-ER-A19P	SKCM	+	Metastatic	0.724656	4.51645	-0.428707	1.48919	-0.443692	-0.227617	1.26271	0.0827163	-0.00182124	-0.445543	-0.25196	-2.04691	-0.974441	0.0458492	-0.528105	0.446118	0.748069
346	TCGA-Z2-AA3V-06A-21-A444-20	TCGA-Z2-AA3V	SKCM	+	Metastatic	2.56824	4.49371	0.917033	-1.99616	1.23156	-0.885226	-0.583488	0.554024	1.825	1.75066	-1.63745	-0.521663	-1.72514	-0.549945	1.08778	0.411751	0.561951
347	TCGA-EE-A3AF-06A-21-A20N-20	TCGA-EE-A3AF	SKCM	+	Metastatic	2.1401	4.6328	2.20802	-2.95513	-1.14862	-2.34564	-1.94988	0.454141	-1.56944	0.0967341	-0.22561	0.0795378	-0.328264	1.15243	-1.43588	0.0996788	1.20251
348	TCGA-DA-A3F8-06A-21-A241-20	TCGA-DA-A3F8	SKCM	+	Metastatic	0.212612	4.52541	-1.45088	1.45201	0.630108	-1.20159	0.976443	0.759041	0.511296	0.261125	-0.997128	-0.787093	0.348761	-0.027359	-0.116963	1.96019	-0.139197
349	TCGA-EE-A3JE-06A-21-A241-20	TCGA-EE-A3JE	SKCM	+	Metastatic	0.454308	3.09881	-0.248393	1.29357	-0.134329	-0.854239	1.39038	-0.0178662	0.516069	-0.44851	0.240932	-1.60336	0.852115	0.212451	0.331237	-0.137252	0.337239
350	TCGA-EB-A5UN-06A-21-A443-20	TCGA-EB-A5UN	SKCM	+	Metastatic	0.415379	3.06941	-0.617523	-0.939346	0.0926883	1.32218	0.0876077	2.52922	1.67756	0.726433	-0.239455	2.09997	0.10795	0.0811805	0.727602	1.2543	-1.21775
351	TCGA-ER-A2NC-06A-31-A20N-20	TCGA-ER-A2NC	SKCM	+	Metastatic	0.0347836	3.73105	-0.966353	0.587868	-0.138481	-1.42659	0.740362	0.593638	1.934	-0.166962	-0.653315	0.33314	-0.126636	0.21281	0.478273	1.18044	-0.181471
352	TCGA-ER-A19G-06A-21-A20N-20	TCGA-ER-A19G	SKCM	+	Metastatic	-0.456362	4.69941	-0.141986	-0.139682	2.34562	1.84419	-0.719151	-1.56726	0.0990962	-0.409462	-0.453332	-0.939361	-0.265517	-0.0529739	-0.474437	1.12085	-0.236272
353	TCGA-GF-A6C9-06A-21-A444-20	TCGA-GF-A6C9	SKCM	+	Metastatic	0.787198	4.40972	0.947183	-0.369628	1.19054	2.87829	-0.614093	0.669637	-2.091	-0.459463	-0.0665334	-0.700348	0.00617046	0.317777	0.491213	-0.706959	0.401702
354	TCGA-EM-A2CR-01A-21-A21M-20	TCGA-EM-A2CR	THCA	-	Primary	5.29314	-0.588415	-1.04708	0.905324	-0.366278	0.166136	0.0229251	0.293116	-0.249259	0.465782	-0.215082	0.415538	0.344502	0.264021	-0.313632	0.394264	-0.248659
355	TCGA-DJ-A3VK-01A-21-A301-20	TCGA-DJ-A3VK	THCA	-	Primary	4.54824	-0.562694	-1.19913	1.77481	-0.477736	-0.17998	0.0192356	0.138227	-0.681462	0.00317829	1.33543	-0.283488	0.478463	0.193554	0.554684	0.160617	0.54246
356	TCGA-EL-A3CW-01A-21-A21N-20	TCGA-EL-A3CW	THCA	-	Primary	4.19922	0.428884	-1.89661	0.113702	-0.222142	-1.40681	0.711303	-0.340156	-0.644958	1.84962	0.805034	0.731941	-1.21155	0.853166	-0.180143	1.43076	0.0161899
357	TCGA-EM-A3FN-01A-21-A21L-20	TCGA-EM-A3FN	THCA	-	Primary	7.96691	-1.03138	-3.28699	-0.974744	1.52055	0.48609	0.0557623	-0.151974	-0.393909	-0.443855	0.0459189	0.491936	-0.820876	0.147344	-0.653697	0.0345129	0.698125
358	TCGA-EM-A2CK-01A-21-A21M-20	TCGA-EM-A2CK	THCA	-	Primary	3.59579	0.820166	0.936826	-0.571705	2.04429	-1.55764	2.7294	0.219362	-1.40241	1.38327	1.042	0.0490795	-0.407745	0.527233	-0.130262	-0.327002	-0.203688
359	TCGA-EM-A22J-01A-21-A21N-20	TCGA-EM-A22J	THCA	-	Primary	4.07293	0.654968	-1.20673	-0.292642	0.863749	2.1628	-0.305577	-0.323433	-2.10586	0.275458	-0.408535	-1.76664	0.0298154	-0.404424	0.382939	-1.05174	-0.77975
360	TCGA-ET-A3DS-01A-21-A21N-20	TCGA-ET-A3DS	THCA	-	Primary	8.61988	-1.26855	-3.82421	-2.31547	1.47795	0.158611	-0.720484	1.18662	0.63089	0.0427082	0.018337	-0.373427	0.116347	-0.243536	-0.215729	-0.112605	0.385959
361	TCGA-DJ-A13M-01A-21-A21L-20	TCGA-DJ-A13M	THCA	-	Primary	7.03609	-1.56091	-1.36364	-0.567372	-2.93872	0.352822	1.90082	-0.38743	-0.65751	-1.57279	-1.34702	2.21879	-0.126805	-0.631112	-0.192629	1.00084	0.950579
362	TCGA-J8-A3O0-01A-21-A21M-20	TCGA-J8-A3O0	THCA	-	Primary	6.43459	-1.15854	-2.09319	-0.211926	0.272053	-0.600609	-0.612257	0.827819	0.265133	-0.593938	0.197354	-0.116954	0.559561	0.207947	0.35328	-0.274129	0.595921
363	TCGA-EL-A3ZN-01A-21-A301-20	TCGA-EL-A3ZN	THCA	-	Primary	5.47707	-0.266374	-1.60777	0.666001	0.666507	0.084133	-1.35262	0.453082	-0.340621	-0.195375	0.112622	0.278538	0.536528	0.139881	0.438568	-0.120632	-0.315141
364	TCGA-EM-A4FH-01A-21-A302-20	TCGA-EM-A4FH	THCA	-	Primary	3.53895	0.122808	0.863713	1.92493	-0.11929	-0.907012	1.32185	0.797099	-0.894573	-0.0692052	-0.80023	1.51796	0.105853	-0.826676	0.294008	-0.873118	0.761763
365	TCGA-ET-A40R-01A-21-A301-20	TCGA-ET-A40R	THCA	-	Primary	3.50824	0.171454	0.838144	1.0701	0.369558	-0.125717	-0.751622	0.735884	0.407787	-0.797288	-0.478478	0.491366	-0.065756	-0.238432	0.799898	-0.352428	-0.105491
366	TCGA-J8-A3O1-01A-21-A21M-20	TCGA-J8-A3O1	THCA	-	Primary	3.59861	1.05912	1.39483	1.16336	0.106726	1.56313	-0.756347	0.0664372	-0.83143	1.06005	-0.557362	0.758447	-0.184213	-0.130814	0.305517	0.522318	-0.30488
367	TCGA-EL-A3T9-01A-11-A301-20	TCGA-EL-A3T9	THCA	-	Primary	7.28279	-0.617565	-2.86971	-0.990162	0.299553	-0.642784	-1.05539	0.769437	0.15793	-0.110934	0.664309	-0.487309	0.357096	-0.357926	-0.524049	-0.503467	0.144775
368	TCGA-H2-A2K9-01A-21-A21M-20	TCGA-H2-A2K9	THCA	-	Primary	6.98534	-0.220299	-2.22736	-0.737917	0.822628	-1.44673	-1.00616	0.21958	-0.383807	0.425308	2.14477	-0.742048	0.818781	-0.00436961	-0.185626	0.987929	-0.275087
369	TCGA-EM-A2CJ-01A-21-A21M-20	TCGA-EM-A2CJ	THCA	-	Primary	6.20258	-0.317024	-1.32636	-1.06752	-1.37151	1.3287	1.84128	-1.48006	-0.554256	-0.101261	-0.199642	0.896302	-0.497894	0.550036	1.00966	0.668245	-0.111643
370	TCGA-BJ-A28Z-01A-21-A21L-20	TCGA-BJ-A28Z	THCA	-	Primary	3.31491	-0.810001	1.81698	0.107551	1.99221	-0.0614351	1.88136	-0.0928129	0.550581	0.624684	0.18663	-0.329932	0.503186	-0.896032	0.511524	-0.621863	1.73486
371	TCGA-BJ-A45G-01A-21-A302-20	TCGA-BJ-A45G	THCA	-	Primary	6.12696	-0.619728	-0.802688	1.81731	-0.678512	0.398972	-2.30907	0.62434	0.455363	-0.468124	1.03933	-0.365082	-0.103973	-0.363724	-0.741659	-0.701547	-1.53843
372	TCGA-EL-A3T2-01A-21-A301-20	TCGA-EL-A3T2	THCA	-	Primary	7.54229	0.40709	-1.34192	-2.54149	2.71153	-2.89177	0.93623	0.692154	-0.864901	-0.535904	1.61346	-0.629045	0.247219	-0.664578	-0.35115	0.501704	-1.5529
373	TCGA-EM-A1YD-01A-21-A21M-20	TCGA-EM-A1YD	THCA	-	Primary	3.46992	0.532954	-0.875509	2.4663	0.278393	0.727055	-1.30886	0.0756161	-1.50772	0.389075	-0.121659	0.337825	0.199832	-0.0337542	-0.307306	0.307892	0.251961
374	TCGA-BJ-A0ZF-01A-21-A21L-20	TCGA-BJ-A0ZF	THCA	-	Primary	6.94155	-0.547837	-2.95649	-1.4482	1.1105	0.53922	1.56859	-0.318934	-0.975035	-1.10801	0.143587	-0.0753035	-0.382812	0.247148	1.06034	-0.291207	0.0425959
375	TCGA-BJ-A28W-01A-21-A21L-20	TCGA-BJ-A28W	THCA	-	Primary	5.13557	0.239663	2.43999	-1.44278	2.38216	-1.7861	2.85048	0.317172	-0.752125	0.371681	-0.704556	0.59919	-1.4556	0.387959	-0.268868	-0.892009	-1.26589
376	TCGA-EL-A3T0-01A-41-A302-20	TCGA-EL-A3T0	THCA	-	Primary	5.46065	-0.762223	-2.09518	0.178442	0.979249	0.431265	-0.62221	0.42599	-0.919077	0.180281	0.141244	0.787451	0.139219	0.319838	-0.458275	0.218838	0.357496
377	TCGA-EM-A2CL-01A-21-A21M-20	TCGA-EM-A2CL	THCA	-	Primary	7.88558	-0.674713	-2.87489	-1.8684	0.389998	-0.49237	-0.928944	-0.296122	0.0536576	0.553942	1.082	-0.637979	0.304521	-0.291898	-0.0977139	-0.0710221	-0.510799
378	TCGA-ET-A2MX-01A-21-A301-20	TCGA-ET-A2MX	THCA	-	Primary	3.99385	-0.120505	2.83847	0.65844	1.34251	-0.0290234	0.851615	-0.0661115	0.0520579	0.175436	-0.692183	0.589773	-0.357931	0.554563	-0.371511	-0.0423318	-0.198665
379	TCGA-DJ-A2PP-01A-21-A21M-20	TCGA-DJ-A2PP	THCA	-	Primary	3.99394	-0.206115	0.70683	2.29714	-0.64669	-0.161471	-1.48065	0.447062	0.156351	0.94581	0.825178	-0.217613	0.00937603	0.281162	0.68207	-0.574324	-0.405871
380	TCGA-DJ-A4V5-01A-21-A302-20	TCGA-DJ-A4V5	THCA	-	Primary	5.26102	0.130689	-2.5887	1.09771	0.495233	-1.73609	-0.883578	1.09581	-0.918619	0.412836	1.17875	0.435574	0.759542	-0.461182	-0.0478716	0.180045	-0.0245056
381	TCGA-BJ-A0ZE-01A-21-A21L-20	TCGA-BJ-A0ZE	THCA	-	Primary	7.88193	-0.803632	-2.74217	-2.10542	-2.11439	0.30077	0.667954	-0.459322	0.132698	-0.475125	0.323196	-0.494935	-0.0271162	-0.797196	0.311421	-0.312379	-0.542159
382	TCGA-ET-A39R-01A-21-A21N-20	TCGA-ET-A39R	THCA	-	Primary	7.12965	-0.962839	-3.6522	-0.925274	0.859564	-0.472733	-1.43211	0.0344711	0.52089	1.33088	0.262892	-0.122069	-0.220434	-0.101576	0.210348	-0.545707	0.0377245
383	TCGA-BJ-A190-01A-21-A21L-20	TCGA-BJ-A190	THCA	-	Primary	3.71318	-0.205386	2.159	-1.3758	2.03045	-2.06109	2.42884	-0.412214	-1.23485	1.33843	1.16126	-0.475494	-0.579434	1.25837	-0.392121	-0.329564	-0.930749
384	TCGA-EM-A1YA-01A-21-A21M-20	TCGA-EM-A1YA	THCA	-	Primary	2.94123	-1.14107	-0.941696	2.50869	-0.215998	-0.844046	-0.292509	-0.78806	-1.16759	1.02683	0.439488	0.106709	0.180985	0.411008	0.314767	-0.537739	-0.23637
385	TCGA-EL-A3GW-01A-21-A21L-20	TCGA-EL-A3GW	THCA	-	Primary	5.60051	0.475099	0.301448	-1.91493	2.98252	-1.37545	1.86031	0.0953518	-1.10675	0.299532	1.28641	-0.807885	-0.583069	-0.48659	0.443581	-0.124947	-1.16312
386	TCGA-EM-A2CN-01A-21-A21M-20	TCGA-EM-A2CN	THCA	-	Primary	5.80004	-1.00939	1.05472	0.443287	1.28893	0.222895	0.55206	-0.0707062	-0.0618613	-1.29052	-1.49168	0.531044	-0.523646	0.511998	-0.279244	-0.292031	-0.23118
387	TCGA-FY-A3WA-01A-21-A301-20	TCGA-FY-A3WA	THCA	-	Primary	4.81679	-1.44831	-3.22404	1.41385	-1.68666	-0.747653	0.120125	-0.807338	-0.723875	0.1006	-0.126696	0.475113	-1.2928	0.0251019	1.10827	-0.696031	-0.107654
388	TCGA-EL-A4K2-01A-21-A302-20	TCGA-EL-A4K2	THCA	-	Primary	5.59927	-0.574993	-2.34846	-0.161971	-1.18877	0.580506	0.647159	0.12701	-1.07125	-0.666629	-0.831979	-0.542962	0.714846	0.296909	0.184118	-0.181383	0.22877
389	TCGA-CE-A485-01A-21-A302-20	TCGA-CE-A485	THCA	-	Primary	3.86524	0.490804	-1.24519	1.89186	-0.608258	-1.18401	-0.336006	1.08759	-0.808414	0.549461	1.32378	0.6699	1.03404	-0.234106	0.0906009	0.508855	0.219483
390	TCGA-E8-A438-01A-21-A301-20	TCGA-E8-A438	THCA	-	Primary	4.08036	-0.0417617	-0.219907	0.812577	0.522385	1.39341	-1.05297	-0.627935	0.0221075	-0.183869	0.969616	0.390544	-0.252779	0.603457	-0.219519	-0.0793653	-0.476712
391	TCGA-ET-A25L-01A-21-A21N-20	TCGA-ET-A25L	THCA	-	Primary	3.81132	-0.598015	0.835691	1.82092	-0.905348	-0.681763	-0.744298	-1.28729	-0.243332	1.02488	1.27652	-0.431145	-0.140835	-0.0862937	0.862054	0.241278	-0.594195
392	TCGA-FK-A3SD-01A-21-A301-20	TCGA-FK-A3SD	THCA	-	Primary	5.3931	-0.184054	-0.940091	-0.942735	0.824856	-0.919499	-0.947974	0.355481	0.42541	1.80286	0.693132	0.0959883	-1.17504	-0.713082	0.583186	0.371764	-0.267424
393	TCGA-EL-A3ZS-01A-21-A301-20	TCGA-EL-A3ZS	THCA	-	Primary	5.13064	-0.179198	-2.05143	1.08607	-1.18422	-0.597595	-0.545915	-0.510494	0.206683	1.63885	-0.75363	0.426371	-1.33053	-0.868911	1.61271	-0.32554	0.17136
394	TCGA-EL-A3ZR-01A-21-A301-20	TCGA-EL-A3ZR	THCA	-	Primary	6.30233	-0.181219	-2.23623	-1.04975	2.47563	-0.453443	1.28914	-0.33451	-1.42963	-0.748816	-0.309819	-0.276674	-0.902254	0.0385689	1.03621	-0.610046	-0.0818898
395	TCGA-ET-A4KQ-01A-21-A302-20	TCGA-ET-A4KQ	THCA	-	Primary	7.49076	0.274138	-1.60017	-0.901505	0.974112	-0.714464	0.681492	0.256119	-1.00495	-0.720655	0.965369	0.325339	-0.169367	-0.219459	-0.711422	1.09547	-0.581798
396	TCGA-ET-A2N3-01B-13-A301-20	TCGA-ET-A2N3	THCA	-	Primary	7.67535	-1.79025	-4.16298	-1.8666	0.821746	-1.93749	-0.124103	1.07079	-0.257892	-1.82072	-0.959893	-0.04413	-0.724657	-1.01047	1.21092	-0.323423	0.00350766
397	TCGA-EL-A3ZH-01A-41-A302-20	TCGA-EL-A3ZH	THCA	-	Primary	6.13382	0.50587	-0.974563	0.383946	-0.566817	-0.533394	-0.931011	-0.364558	-1.12801	-0.138137	2.5233	-0.870081	0.597889	-0.764334	0.180636	1.01809	-1.15931
398	TCGA-EM-A2OY-01A-21-A21M-20	TCGA-EM-A2OY	THCA	-	Primary	3.73452	0.555469	-0.219197	3.55114	-1.10763	-1.15406	-1.18903	0.631656	-0.518955	1.1901	1.34728	1.08474	0.00572434	-0.739128	0.380374	0.179745	0.00632265
399	TCGA-DJ-A4V0-01A-21-A302-20	TCGA-DJ-A4V0	THCA	-	Primary	5.30349	-0.992771	-1.62541	0.652313	0.194573	-0.0242888	-0.804781	0.540252	-0.534007	0.713896	0.366506	0.408528	0.653832	0.562546	-0.705841	0.0939493	0.461286
400	TCGA-ET-A39N-01A-21-A21N-20	TCGA-ET-A39N	THCA	-	Primary	6.2362	-0.0901436	-1.07476	0.0888396	-0.0599489	-0.299468	-1.20769	-0.758686	-0.183	0.310785	0.0256555	0.139849	-1.39735	-1.46669	1.4439	0.0678735	-0.733183
401	TCGA-DJ-A13R-01A-21-A21L-20	TCGA-DJ-A13R	THCA	-	Primary	3.09059	0.0716417	2.93653	0.514473	1.77509	0.54572	1.66251	-0.0875546	0.5924	0.144401	0.0700053	-0.228036	0.496119	-0.707422	0.600853	-0.180579	1.38703
402	TCGA-ET-A25M-01A-21-A21N-20	TCGA-ET-A25M	THCA	-	Primary	5.61757	-0.593349	-3.13266	-0.469073	-0.261947	-2.295	0.480111	0.167073	-0.315874	0.130266	1.29807	-0.795074	-0.744586	0.229495	0.627381	0.494872	-0.286433
403	TCGA-DE-A4M9-01A-21-A302-20	TCGA-DE-A4M9	THCA	-	Primary	4.76769	-0.427359	2.56699	1.28944	0.87452	-1.02191	0.97469	0.302225	-0.210841	-0.578205	-0.699548	0.57142	-0.256706	-1.1899	1.01411	-0.983626	-0.471065
404	TCGA-BJ-A45K-01A-21-A302-20	TCGA-BJ-A45K	THCA	-	Primary	5.05281	-0.243721	-1.08557	0.555311	-0.0576	-0.948514	-0.468753	-0.877421	-0.826654	1.37469	1.65332	0.202181	-1.00869	0.191813	-0.491592	0.866626	-0.49437
405	TCGA-EL-A3ZK-01A-41-A302-20	TCGA-EL-A3ZK	THCA	-	Primary	5.44194	0.540136	-1.58296	0.85767	0.442662	-0.443748	-1.39518	0.361959	-0.763799	-0.229614	1.7511	0.250972	1.17233	0.0544114	-0.15161	1.03913	-0.19862
406	TCGA-DJ-A3US-01A-21-A301-20	TCGA-DJ-A3US	THCA	-	Primary	3.86028	1.00122	0.347534	2.53783	-0.524604	-0.282739	-0.190121	0.942977	-0.923423	0.457184	0.896848	1.50987	0.474761	-1.44528	0.862249	-0.785885	-0.52045
407	TCGA-FK-A3SE-01A-21-A302-20	TCGA-FK-A3SE	THCA	-	Primary	5.71541	0.819725	0.0764723	-0.938134	-1.16663	1.18079	-0.289191	0.032819	-1.16481	-0.243905	-0.8187	-1.01614	-0.208127	-0.648466	-0.260699	-0.751741	-0.644471
408	TCGA-CE-A3MD-01A-22-A301-20	TCGA-CE-A3MD	THCA	-	Primary	8.20736	-0.684758	-1.85184	-3.42915	0.354463	0.767402	0.0150558	-0.712746	-0.150554	0.415635	-0.951605	0.420665	-0.271334	1.23241	-0.271738	0.502444	0.583218
409	TCGA-FE-A239-01A-21-A21M-20	TCGA-FE-A239	THCA	-	Primary	5.19237	0.523647	-0.187454	1.28748	-0.896533	0.786049	-1.38523	-0.104696	-0.693718	-0.776349	-0.527444	-1.01838	-1.12973	-0.91444	-0.394452	-1.36635	-0.43044
410	TCGA-EL-A4KI-01A-21-A302-20	TCGA-EL-A4KI	THCA	-	Primary	5.69476	-0.961901	-2.06544	0.0873703	0.421956	0.0912129	0.466524	-1.43048	-1.52298	-0.499049	1.27028	-1.07783	-0.465173	0.543224	0.63012	-0.0278533	0.00876303
411	TCGA-E3-A3E0-01A-21-A21N-20	TCGA-E3-A3E0	THCA	-	Primary	4.69195	0.563929	0.340752	-0.308683	-0.433565	-0.738494	0.221725	-0.738764	-1.6892	0.875685	1.72721	0.226494	0.390531	0.840652	-0.528367	1.59204	-0.124904
412	TCGA-BJ-A0Z2-01A-21-A21L-20	TCGA-BJ-A0Z2	THCA	-	Primary	5.29201	0.608146	-0.252928	-0.396959	1.79498	-2.88525	1.36172	0.563786	-1.70733	1.00769	1.73762	0.205381	0.237123	-0.165827	0.0123847	0.547742	-0.0513365
413	TCGA-DJ-A1QL-01A-21-A21L-20	TCGA-DJ-A1QL	THCA	-	Primary	3.8788	-0.0301327	1.47626	1.59385	0.442864	-0.693064	-0.374858	0.0465309	-0.89218	-0.164969	0.431218	-0.972167	0.142525	-0.94939	0.56968	0.00513042	-0.0685643
414	TCGA-EL-A3CY-01A-21-A21N-20	TCGA-EL-A3CY	THCA	-	Primary	4.51633	0.314164	1.53931	0.169488	1.86758	-1.11587	1.8687	0.167882	-0.990221	0.67956	0.254984	0.576194	-0.894904	-0.0563345	-0.337558	-0.00800587	-0.46159
415	TCGA-BJ-A2N9-01A-21-A21L-20	TCGA-BJ-A2N9	THCA	-	Primary	6.82144	-0.706809	-2.53819	-1.25224	0.325509	0.950399	-0.0982389	-0.640057	-0.306739	0.931308	-0.419522	0.371337	-0.645096	0.111115	-0.00197536	0.0647714	0.010097
416	TCGA-BJ-A291-01A-21-A21L-20	TCGA-BJ-A291	THCA	-	Primary	6.70414	0.214741	-1.4869	-0.319519	0.311386	-0.341817	-1.26123	0.12797	-0.480467	0.180378	2.39683	-0.513659	0.93767	-0.153049	-0.105283	1.00829	-0.860666
417	TCGA-BJ-A0Z5-01A-21-A21L-20	TCGA-BJ-A0Z5	THCA	-	Primary	5.88483	-0.00280779	-2.87355	0.264792	-0.905675	0.0862532	-0.672501	1.0379	-0.905284	-0.239919	-0.529504	-0.613471	0.0310353	-0.0545747	-0.158102	-0.688481	-0.233641
418	TCGA-ET-A2N5-01A-21-A21M-20	TCGA-ET-A2N5	THCA	-	Primary	4.01098	-0.27394	-1.04995	1.45149	-0.30192	0.787687	-0.288658	0.254965	-1.24431	-1.15799	0.235193	-0.0992722	-0.00629487	0.501278	-0.0250421	0.210155	0.559178
419	TCGA-BJ-A0YZ-01A-21-A21L-20	TCGA-BJ-A0YZ	THCA	-	Primary	4.69198	0.189652	0.525257	-0.284316	1.63001	-0.286837	2.02586	-0.778911	-0.96454	0.859153	-0.202639	0.68338	-1.49074	0.873891	0.441993	-1.25556	-0.540946
420	TCGA-BJ-A191-01A-21-A21L-20	TCGA-BJ-A191	THCA	-	Primary	6.60597	-1.00873	-2.80029	-1.17672	0.809245	-0.34418	0.150415	0.00963789	0.208344	-0.0297732	-0.0782321	-0.56021	-1.07425	0.0928583	1.31767	-0.0568993	-0.337462
421	TCGA-DJ-A4UR-01A-21-A302-20	TCGA-DJ-A4UR	THCA	-	Primary	3.84584	-0.774367	1.49305	1.84119	0.0518624	0.284879	0.0156769	-0.156023	-0.311751	0.580789	0.160717	0.393652	0.438387	0.578034	-0.286362	-0.123861	0.53823
422	TCGA-ET-A40P-01A-21-A301-20	TCGA-ET-A40P	THCA	-	Primary	3.83805	-0.422797	1.24942	1.64786	-0.200683	0.782515	0.580527	-0.277171	-0.88517	-0.408128	-0.758994	0.591899	-0.0180218	0.3058	0.0993595	-0.2158	-0.0337293
423	TCGA-FE-A3PA-01A-21-A302-20	TCGA-FE-A3PA	THCA	-	Primary	3.63642	0.0230125	2.55885	-0.824282	1.42438	-1.76285	2.07307	-0.0551535	-0.731517	1.46489	0.37726	0.56141	-0.474126	1.19969	-0.733717	-0.177755	-0.7736
424	TCGA-EM-A3SY-01A-21-A301-20	TCGA-EM-A3SY	THCA	-	Primary	5.25028	-0.445537	-3.2815	0.281028	-0.842892	-1.33018	-0.660649	-0.179938	-1.13434	0.818349	-0.512645	0.7352	1.16923	0.869591	0.290467	0.474197	-0.299709
425	TCGA-ET-A39L-01A-21-A21N-20	TCGA-ET-A39L	THCA	-	Primary	3.19304	0.891428	0.236457	0.717702	0.389985	0.0782422	0.12337	-1.29454	-1.96368	2.32403	0.76788	-0.783807	-0.769742	0.845806	0.413628	0.727399	-0.383512
426	TCGA-BJ-A28S-01A-21-A21L-20	TCGA-BJ-A28S	THCA	-	Primary	6.88775	-0.99395	-2.70171	-1.70508	1.38947	0.831253	0.0487101	-0.290462	-0.00154044	0.579509	-0.85087	0.226957	-0.0510752	0.815547	-0.451334	-0.292502	0.526645
427	TCGA-DJ-A13W-01A-21-A21L-20	TCGA-DJ-A13W	THCA	-	Primary	7.25345	-1.1859	-2.01285	-3.46755	1.62885	0.502093	1.27416	-0.241723	-0.62555	0.191011	-0.106592	0.36597	0.105753	1.24212	-0.822352	0.634895	0.748569
428	TCGA-BJ-A2P4-01A-21-A21L-20	TCGA-BJ-A2P4	THCA	-	Primary	5.8325	-0.492071	-0.63351	-1.38976	-2.44596	0.87871	1.12944	0.0788844	-0.630749	-0.726568	0.193747	0.592291	0.541304	1.21844	0.128115	0.574482	1.0218
429	TCGA-EM-A3ST-01A-21-A302-20	TCGA-EM-A3ST	THCA	-	Primary	5.9409	-0.487168	-1.02812	-2.04678	0.860877	1.25198	0.328193	-0.717449	-0.0342347	0.403421	-1.01865	0.158224	-0.909933	0.469256	0.347021	0.440936	0.00228586
430	TCGA-EL-A3ZM-01A-21-A301-20	TCGA-EL-A3ZM	THCA	-	Primary	7.04609	-0.937921	-3.22278	-0.400732	0.14988	-0.818704	-0.922165	1.46214	0.306076	0.866321	-0.00537342	0.222158	0.308442	-0.158938	-0.267534	0.216002	0.317431
431	TCGA-EL-A3TB-01A-21-A301-20	TCGA-EL-A3TB	THCA	-	Primary	5.13116	-0.140086	-1.71718	-0.628021	0.721042	0.216804	0.299957	-0.950973	0.0616374	0.739032	0.0325054	0.189289	-0.199654	0.349735	1.49006	-0.504873	-0.325879
432	TCGA-EM-A3O6-01A-21-A301-20	TCGA-EM-A3O6	THCA	-	Primary	7.96209	-0.934219	-2.87784	-1.56091	1.79336	1.18592	-0.887248	-0.173708	-0.221481	0.403896	0.245298	-0.0519749	-0.697396	0.383994	-0.467002	0.497204	0.0789875
433	TCGA-DE-A0Y2-01A-21-A21L-20	TCGA-DE-A0Y2	THCA	-	Primary	4.50056	0.06128	-0.430933	3.19592	-1.80185	-0.606508	-1.47738	1.07614	-0.0113197	-0.026955	0.80255	0.320141	0.507163	-0.334392	-0.431065	-0.208402	-0.508142
434	TCGA-EM-A22Q-01A-21-A21M-20	TCGA-EM-A22Q	THCA	-	Primary	6.34347	-0.710209	-2.10852	-0.315541	1.31235	0.418252	-0.742687	-0.311107	-0.59082	0.467646	1.30243	-0.343292	-0.108064	0.0653992	-0.606713	-0.321908	-0.32081
435	TCGA-CE-A484-01A-21-A302-20	TCGA-CE-A484	THCA	-	Primary	4.33284	-0.540895	-1.33319	0.941515	-0.445608	-0.65954	0.512689	-0.0521575	-0.509449	0.529945	0.286944	-0.125927	-0.220392	2.01121	0.621719	-0.195785	0.323234
436	TCGA-CE-A13K-01A-21-A21L-20	TCGA-CE-A13K	THCA	-	Primary	2.7	1.25113	0.0327417	2.2855	-1.35502	-1.02139	0.565094	2.45187	-0.178445	1.22915	0.294496	1.52273	0.943787	0.280126	0.33793	-0.593059	0.00525585
437	TCGA-ET-A4KN-01A-21-A302-20	TCGA-ET-A4KN	THCA	-	Primary	3.95357	1.1388	1.36364	0.129773	1.50726	-3.1047	1.73207	0.259706	-1.52783	1.1776	2.40222	-0.103789	-0.368622	-0.607678	0.839981	-0.108857	-0.32294
438	TCGA-EL-A3CO-01A-21-A21N-20	TCGA-EL-A3CO	THCA	-	Primary	4.46395	-0.394155	2.47305	-2.0896	1.79095	-1.00367	2.26744	0.132819	1.58931	0.629952	0.0594354	-0.58529	0.523344	-1.64675	0.239809	-0.559783	0.825653
439	TCGA-DJ-A4UT-01A-21-A302-20	TCGA-DJ-A4UT	THCA	-	Primary	5.16889	-0.100324	-0.752452	1.71227	-0.446187	-0.361337	-1.22784	0.664529	-0.0201028	0.0694569	1.35185	0.0433318	0.813425	-0.0372932	-0.115713	0.48721	-0.458527
440	TCGA-EL-A3H2-01A-21-A21M-20	TCGA-EL-A3H2	THCA	-	Primary	7.30943	-1.13249	-3.20338	-1.35255	1.42973	0.85184	-1.4014	-0.180215	0.635904	0.704447	0.637527	-0.919025	-0.320811	0.47954	-0.151526	-0.347458	0.0682292
441	TCGA-EM-A3FP-01A-21-A21L-20	TCGA-EM-A3FP	THCA	-	Primary	6.67982	-0.420413	-1.10855	-1.75706	-1.23316	0.0558342	-0.106875	0.0860019	0.375636	-0.154001	0.196264	-0.748883	0.241098	-0.731688	0.191362	-0.293666	-1.01577
442	TCGA-BJ-A2N7-01A-21-A21L-20	TCGA-BJ-A2N7	THCA	-	Primary	5.15818	0.0460545	0.0176667	-1.12729	2.5556	-0.932107	1.76949	0.784841	-0.91479	-0.579389	0.0837789	-0.27408	-0.0321291	-0.164738	0.303987	-1.3052	-0.484763
443	TCGA-EL-A3CX-01A-21-A21N-20	TCGA-EL-A3CX	THCA	-	Primary	5.60848	-0.429995	0.191017	-2.35001	1.99568	-0.844739	1.23348	0.565696	0.523307	0.179798	1.31558	-0.748135	1.40719	-0.978025	-0.285801	0.0190475	0.754783
444	TCGA-EM-A2CU-01A-21-A21M-20	TCGA-EM-A2CU	THCA	-	Primary	6.65363	-0.489441	-3.00011	1.63007	-0.527552	0.22001	-2.20439	0.713042	-0.304704	-0.61962	0.959858	0.199505	0.0095994	-0.0185948	-0.216652	-1.31671	-0.264615
445	TCGA-EM-A2CQ-01A-21-A21M-20	TCGA-EM-A2CQ	THCA	-	Primary	5.79583	0.346063	-1.32888	1.28505	-1.09014	-0.403378	-0.559858	0.121252	-0.595364	-0.0176735	1.67332	0.131413	0.220517	-0.50518	-0.0203567	-0.0810562	-0.709137
446	TCGA-BJ-A3PR-01A-21-A301-20	TCGA-BJ-A3PR	THCA	-	Primary	6.62938	-0.309249	-3.47043	-0.350003	0.947183	-0.963301	-1.36437	1.01474	-0.478132	0.465535	1.26269	0.459895	0.572921	-0.0166112	-0.815902	0.222869	0.392769
447	TCGA-EM-A2CM-01A-21-A21M-20	TCGA-EM-A2CM	THCA	-	Primary	5.603	-0.488569	-4.07298	1.55825	-0.775276	-0.63801	0.509771	-0.126593	-0.263286	0.781472	-0.865671	0.600237	-2.12074	0.491987	1.28919	-1.25934	0.871476
448	TCGA-FY-A2QD-01A-21-A21N-20	TCGA-FY-A2QD	THCA	-	Primary	7.665	-1.06495	-1.23874	-3.06271	-0.0455113	-0.392182	0.61081	-0.374962	0.758952	-0.566509	-0.154638	-0.354533	0.530321	-0.790716	-0.124496	-0.458598	0.299858
449	TCGA-EL-A3H1-01A-21-A21M-20	TCGA-EL-A3H1	THCA	-	Primary	4.94768	-0.795043	2.20195	0.498729	0.238351	-1.13127	0.894658	-0.152963	0.708614	-0.205376	0.510101	-0.508914	1.00768	-1.05755	0.263298	0.310471	0.796386
450	TCGA-DJ-A3VG-01A-21-A302-20	TCGA-DJ-A3VG	THCA	-	Primary	3.48758	0.176802	2.35144	1.5575	0.962995	-0.509259	0.10821	-0.071341	-1.16023	0.880412	0.157997	0.268783	-0.208427	0.173998	-0.487897	0.510054	-0.16656
451	TCGA-EM-A3AP-01A-21-A21N-20	TCGA-EM-A3AP	THCA	-	Primary	6.41832	0.310089	-1.69668	-0.490506	-1.84317	0.677153	-0.353644	-0.026585	-0.261164	-1.87786	-0.348215	-0.322268	-0.465272	-0.782925	-0.0901876	-0.663412	-0.841319
452	TCGA-EL-A3D5-01A-11-A21N-20	TCGA-EL-A3D5	THCA	-	Primary	2.98016	-0.406935	0.779054	3.03358	-0.940239	0.0560406	-0.884094	0.732092	-0.151966	0.373392	-0.20345	0.225799	-0.0979267	-0.141193	0.433751	-0.265902	0.109396
453	TCGA-BJ-A0Z0-01A-21-A21L-20	TCGA-BJ-A0Z0	THCA	-	Primary	8.55494	-1.60063	-1.74443	-0.017793	1.10496	1.35275	-1.29727	0.598225	0.844418	-1.94138	-1.69255	0.464337	-0.956642	0.41214	-1.3093	0.350832	-0.13244
454	TCGA-EL-A4JV-01A-21-A302-20	TCGA-EL-A4JV	THCA	-	Primary	3.56285	0.403289	2.81457	1.56423	1.70877	-0.890912	0.419268	0.424595	-0.914867	-0.799165	0.317961	0.54679	-0.474519	-1.19407	0.999493	-0.512548	-0.443437
455	TCGA-CE-A27D-01A-21-A21L-20	TCGA-CE-A27D	THCA	-	Primary	5.54078	-1.62371	0.617195	1.27801	0.949427	1.04144	-0.499301	0.052653	0.285016	-0.756843	0.0654066	-0.553838	0.0125162	0.832929	-0.86467	0.433172	-0.278905
456	TCGA-CE-A481-01A-41-A302-20	TCGA-CE-A481	THCA	-	Primary	3.87622	-0.616232	1.85013	2.0785	0.451626	-0.46229	0.233613	1.02317	0.150198	-0.252091	-1.06109	0.327321	8.49431e-05	-0.389154	0.379129	-0.728437	0.226294
457	TCGA-EL-A3H3-01A-21-A21L-20	TCGA-EL-A3H3	THCA	-	Primary	5.87633	-1.6184	0.726085	0.660099	1.25992	0.873259	-0.182383	-0.245009	1.23026	-1.24803	0.121115	-1.22888	0.479371	-0.147816	-0.419337	0.099516	0.749336
458	TCGA-ET-A3DV-01A-21-A21N-20	TCGA-ET-A3DV	THCA	-	Primary	4.24478	-0.586931	2.60834	0.694348	-0.516863	-0.0586404	1.65756	-0.423869	-0.568845	-0.727558	-0.784646	0.822278	0.265045	0.654879	0.19589	0.76206	0.456996
459	TCGA-EM-A1YC-01A-21-A21M-20	TCGA-EM-A1YC	THCA	-	Primary	4.89539	0.596695	1.81184	-0.0439526	-0.579769	0.228529	-1.23161	-0.550884	-0.373615	1.60339	-0.333316	-0.379868	-1.21157	-1.56255	-0.780338	-1.30114	-1.27227
460	TCGA-EM-A3AO-01A-21-A21N-20	TCGA-EM-A3AO	THCA	-	Primary	6.95965	-1.17557	-0.128972	-1.60262	1.02651	-0.480855	-0.186808	0.503782	1.31085	-0.295702	-0.129683	-0.666736	0.548709	-0.799577	-0.0724603	-0.5752	0.511199
461	TCGA-EM-A3AJ-01A-21-A21N-20	TCGA-EM-A3AJ	THCA	-	Primary	6.68471	-1.2051	-0.674021	0.737267	0.219436	0.652225	-1.02232	0.667149	0.238131	-0.386764	-0.409564	0.907025	0.576116	0.527972	-0.981021	0.849341	-0.0373949
462	TCGA-DE-A2OL-01A-21-A21L-20	TCGA-DE-A2OL	THCA	-	Primary	4.18387	0.17881	3.17426	0.962385	0.432699	0.149124	-0.553059	-0.648158	-0.719323	-0.161843	-1.36337	0.770559	-0.91548	-0.133741	-0.598714	-0.115504	-0.438145
463	TCGA-EM-A22L-01A-21-A21N-20	TCGA-EM-A22L	THCA	-	Primary	4.24257	-0.738705	0.558725	1.79498	0.655023	1.4571	-0.956433	-0.477551	0.305262	-0.629306	0.222392	-0.228475	-0.690849	0.263148	-0.0606515	0.268275	0.0499357
464	TCGA-BJ-A0ZC-01A-21-A21L-20	TCGA-BJ-A0ZC	THCA	-	Primary	5.82587	-1.26034	1.14415	0.150401	1.51933	0.330349	0.107741	-0.105292	0.216416	-0.684775	-0.979415	-0.015847	-0.385243	0.702099	-0.652268	-0.0376784	-0.435028
465	TCGA-ET-A3BN-01A-21-A21N-20	TCGA-ET-A3BN	THCA	-	Primary	4.11107	-0.819567	2.4536	1.56009	0.224673	0.00532194	0.936157	-0.014499	-0.34642	-0.747292	-0.130356	-0.388596	0.445751	-0.268082	0.647661	-0.0031557	-0.360351
466	TCGA-EM-A1YE-01A-21-A21M-20	TCGA-EM-A1YE	THCA	-	Primary	4.51499	-1.0271	-0.0142323	1.22114	-1.64138	0.103868	-0.0892963	0.59572	0.608644	0.347616	-0.257921	-0.0779122	0.194872	0.124624	0.966646	-0.250801	0.359022
467	TCGA-BJ-A28T-01A-21-A21L-20	TCGA-BJ-A28T	THCA	-	Primary	8.8581	-2.53997	-2.18157	-1.1229	-1.25209	0.473854	1.68904	-0.284146	0.143638	-4.1548	-1.5646	-0.282439	0.107803	-1.13577	0.900529	0.138497	-0.211067
468	TCGA-BJ-A18Y-01A-21-A21L-20	TCGA-BJ-A18Y	THCA	-	Primary	4.89691	-0.904124	2.25888	1.75946	-1.78947	1.33801	-0.314473	-0.709563	0.867699	0.850215	-0.746732	1.11034	-0.586382	0.0729936	-0.0418608	1.1292	0.194301
469	TCGA-FY-A3W9-01A-21-A301-20	TCGA-FY-A3W9	THCA	-	Primary	4.23511	-0.581735	2.35206	1.09688	2.60582	-0.0710202	1.91868	0.150788	0.182067	0.286862	-0.64761	0.00441734	-0.610614	0.377537	-0.565256	-0.782888	-0.330574
470	TCGA-DJ-A2Q0-01A-21-A21M-20	TCGA-DJ-A2Q0	THCA	-	Primary	6.46248	-1.12766	0.93714	0.428724	0.885025	-0.625351	-0.731641	0.0129395	0.978158	-0.67859	0.561393	-0.14328	0.573902	-0.625289	-0.555444	0.482761	0.368563
471	TCGA-EL-A3GO-01A-21-A21L-20	TCGA-EL-A3GO	THCA	-	Primary	4.6689	0.0591106	1.81642	-1.17812	-0.478669	0.0752181	-0.628712	0.812539	1.46724	1.8625	-0.74972	-0.259155	0.111567	-1.00091	0.469684	-0.426064	-0.146652
472	TCGA-FE-A3PD-01A-21-A302-20	TCGA-FE-A3PD	THCA	-	Primary	5.03765	0.142698	2.34744	-1.98346	-2.2494	0.0766446	1.63403	-1.22093	-0.0738623	0.329385	0.439588	0.935693	-0.148407	-0.617751	-0.672598	-0.355015	0.405208
473	TCGA-EM-A1YB-01A-21-A21M-20	TCGA-EM-A1YB	THCA	-	Primary	3.71249	-1.32839	1.19684	2.63646	-1.49331	0.00644697	-0.193942	-0.207124	0.0586811	0.560474	0.453119	0.209091	0.68444	-0.0393295	0.673946	0.0108678	0.000455026
474	TCGA-BJ-A0ZG-01A-21-A21L-20	TCGA-BJ-A0ZG	THCA	-	Primary	2.59579	-0.839312	1.36809	3.69285	0.484038	-0.226055	-0.586616	0.362862	0.290846	0.0363714	-0.572053	1.22891	-0.0401415	-0.121842	-0.984613	0.0753942	0.133674
475	TCGA-EM-A2CP-01A-21-A21M-20	TCGA-EM-A2CP	THCA	-	Primary	2.72621	0.627937	1.29837	0.8915	0.140651	-0.922497	-0.929633	0.62937	-0.367709	0.982725	-0.560626	1.06778	0.0345796	-0.611386	0.392586	-0.0172046	-0.320493
476	TCGA-ET-A2N1-01A-21-A21M-20	TCGA-ET-A2N1	THCA	-	Primary	5.40322	-1.2776	-0.0815183	0.463103	-1.0264	-0.574748	-0.323444	0.136874	0.224658	0.309721	-0.435898	0.992707	0.952649	1.29082	-1.3259	0.545084	1.16888
477	TCGA-ET-A39I-01A-21-A21N-20	TCGA-ET-A39I	THCA	-	Primary	5.3602	-0.62963	-0.609018	0.882749	-0.454682	-0.164997	-1.22648	1.38073	0.81573	0.618909	0.338191	-0.223325	0.596397	0.0237791	-0.368021	0.361203	-0.279351
478	TCGA-EM-A3FL-01A-21-A21L-20	TCGA-EM-A3FL	THCA	-	Primary	4.83836	-0.687781	1.52206	0.0109827	2.37837	-0.777457	1.43937	0.35584	-0.262661	-0.194602	-0.413602	-0.122355	-0.105471	0.735771	-0.608976	0.0406023	-0.508273
479	TCGA-EM-A3AL-01A-21-A21N-20	TCGA-EM-A3AL	THCA	-	Primary	6.34216	-1.14631	-1.06902	-0.167661	1.0814	0.372101	0.571319	-0.134219	-0.0870341	-1.65844	-1.28468	0.482265	-0.0662549	1.02983	-0.185958	-0.0120345	0.285751
480	TCGA-EL-A3D4-01A-21-A21N-20	TCGA-EL-A3D4	THCA	-	Primary	5.03413	-1.26212	0.914165	1.23573	0.937066	0.193663	0.0983313	-0.480085	-0.504533	-1.6077	-0.724935	-0.216128	-0.196718	0.613583	-0.560231	0.28413	-0.1749
481	TCGA-DE-A3KN-01A-21-A21L-20	TCGA-DE-A3KN	THCA	-	Primary	3.95397	0.390842	3.99247	1.19255	1.20824	-0.414992	0.0893677	-0.234645	-0.596357	-0.0285318	-0.475076	1.04274	-0.344014	0.106549	-0.724774	0.660942	-0.669111
482	TCGA-DJ-A2Q2-01A-21-A21M-20	TCGA-DJ-A2Q2	THCA	-	Primary	3.49583	-0.0305231	2.31667	0.959919	-0.0434625	0.100696	0.778785	0.363793	-0.211414	0.621422	-0.538256	-0.326878	0.739963	-0.594722	0.0783136	-0.380107	0.456481
483	TCGA-EM-A1CW-01A-11-A21M-20	TCGA-EM-A1CW	THCA	-	Primary	3.64814	-0.268892	0.987624	3.07993	-1.3522	-0.720855	-0.489601	-0.133216	-0.530943	-0.0240823	0.610871	0.882064	-0.276661	-0.227831	-0.0998061	0.480061	0.0123934
484	TCGA-DJ-A3UP-01A-21-A301-20	TCGA-DJ-A3UP	THCA	-	Primary	6.64664	-1.01149	-0.593294	-0.242928	0.258052	0.389268	-1.9608	0.628584	1.43937	0.0693748	-0.347278	0.0907515	0.35777	-0.269065	-0.562475	0.378766	-0.447477
485	TCGA-FY-A3I5-01B-21-A301-20	TCGA-FY-A3I5	THCA	-	Primary	5.32484	-1.07516	0.832628	1.55584	-0.966894	0.220814	0.191864	0.326412	0.451108	-0.0497313	-1.48433	0.802178	0.165815	0.406536	-0.209326	0.483854	0.330204
486	TCGA-DJ-A3UV-01A-21-A301-20	TCGA-DJ-A3UV	THCA	-	Primary	6.41058	-1.26078	1.27256	0.298293	1.14057	0.723898	-0.854921	-0.50453	1.48199	-0.786474	0.410873	-1.15106	0.439965	-0.484045	-0.636392	0.437044	-0.346862
487	TCGA-EL-A3CZ-01A-21-A21N-20	TCGA-EL-A3CZ	THCA	-	Primary	5.2157	-0.963776	1.94031	0.0015614	0.083692	-0.133035	0.591257	0.0890074	1.70031	0.617454	-0.365557	-0.0860706	0.577904	-1.13031	-0.0529534	0.231456	0.814721
488	TCGA-EM-A3AI-01A-21-A21N-20	TCGA-EM-A3AI	THCA	-	Primary	7.17999	-1.40624	-0.899185	-1.81984	-2.27345	-0.00206193	1.31066	0.050097	0.775352	-1.38615	-0.500964	-0.385653	0.623707	-0.905072	0.739055	-0.172774	-0.103992
489	TCGA-BJ-A0ZA-01A-21-A21L-20	TCGA-BJ-A0ZA	THCA	-	Primary	7.72728	-1.65937	-1.72465	-0.401751	0.00684842	0.633895	-0.524052	1.15041	0.875161	-1.93119	-0.628224	-0.304696	0.541878	-0.383381	-0.400312	0.356604	-0.507078
490	TCGA-DO-A1JZ-01A-21-A21M-20	TCGA-DO-A1JZ	THCA	-	Primary	4.33754	-0.438679	1.6349	1.49607	0.76462	-0.158566	0.0906803	0.43252	-0.225226	0.684852	-0.544047	0.821586	-0.593429	0.53084	0.0291997	-0.216492	0.0292048
491	TCGA-CE-A482-01A-21-A302-20	TCGA-CE-A482	THCA	-	Primary	3.56235	0.214427	2.26421	1.74797	0.723463	-0.277908	-0.173289	0.329134	-1.10125	0.617989	-0.692265	0.321977	-0.300231	0.26072	-0.0311165	0.112959	-0.318675
492	TCGA-E3-A3DZ-01A-21-A21N-20	TCGA-E3-A3DZ	THCA	-	Primary	3.69707	-0.438097	2.73087	1.56544	0.881254	0.0346141	0.188687	0.164606	-0.0465706	-0.531112	-0.643063	0.664027	0.134846	0.614352	-0.549461	0.0433079	-0.384156
493	TCGA-EM-A2OV-01A-21-A21M-20	TCGA-EM-A2OV	THCA	-	Primary	5.64029	-1.11705	0.738228	-0.0463523	1.8862	0.895493	0.0760688	0.140817	0.338266	-1.2106	-0.331758	-0.201694	0.0901239	0.685844	-0.872584	0.364773	-0.190811
494	TCGA-BJ-A3F0-01A-21-A21L-20	TCGA-BJ-A3F0	THCA	-	Primary	4.84918	-1.03949	1.38841	2.21283	-0.89935	0.226282	-1.64533	-0.062005	0.946121	0.435023	1.13615	-0.70509	-0.218727	-0.575613	-0.0666887	0.36979	-1.06459
495	TCGA-FY-A40M-01A-21-A301-20	TCGA-FY-A40M	THCA	-	Primary	4.69924	-0.372969	2.93184	2.33605	-1.42165	0.453295	-0.579778	-0.653249	0.13387	0.0933489	-0.423437	1.38455	-0.656937	0.178109	0.386866	0.834511	0.00605723
496	TCGA-EL-A3ZP-01A-21-A301-20	TCGA-EL-A3ZP	THCA	-	Primary	4.95775	-0.10863	0.56871	0.795597	-0.273393	-0.768853	0.0918219	0.582891	-0.302253	-0.576937	-1.69555	0.504308	-0.376956	-0.357094	-0.631501	0.112569	-0.634978
497	TCGA-E8-A432-01A-21-A301-20	TCGA-E8-A432	THCA	-	Primary	4.90217	-0.487344	-0.0221507	1.4103	0.134341	-0.586053	-1.20131	0.56277	0.227042	0.492769	0.690857	0.120621	0.241697	0.600658	-1.13551	0.343649	0.0742744
498	TCGA-DJ-A2Q1-01A-11-A21M-20	TCGA-DJ-A2Q1	THCA	-	Primary	7.48359	-1.58279	-0.0623733	-1.11718	-2.27095	1.04584	0.276657	0.0235402	0.854044	-1.79398	-2.08063	1.25373	-0.0634863	-0.0489507	-0.370802	1.06403	0.139928
499	TCGA-DJ-A2Q9-01A-11-A21M-20	TCGA-DJ-A2Q9	THCA	-	Primary	3.48982	-0.0530506	2.68474	-0.477627	-1.5272	0.478528	1.40401	-0.799585	-0.220103	-0.822271	0.1434	0.0790943	-0.193094	0.992305	0.448368	0.192927	0.60209
500	TCGA-DJ-A13S-01A-21-A21L-20	TCGA-DJ-A13S	THCA	-	Primary	4.52806	-0.221601	4.09327	0.781142	1.98115	-1.57656	1.08272	-0.474082	-1.07872	-0.165389	0.210235	0.155884	-0.768436	-0.308656	-0.175201	-0.111796	-0.789889
501	TCGA-EM-A3O9-01A-21-A301-20	TCGA-EM-A3O9	THCA	-	Primary	3.48623	-0.637651	2.23414	1.46728	1.24794	0.105593	0.914915	-0.139016	0.509408	0.033105	-0.365223	-0.00880211	0.491891	-0.808026	0.601368	-0.200053	1.30974
502	TCGA-H2-A3RH-01A-21-A301-20	TCGA-H2-A3RH	THCA	-	Primary	5.16665	-0.990904	1.76298	0.668451	1.31678	-0.208025	-0.265132	-0.479778	0.972948	-0.805798	1.13617	-0.831078	1.02585	-0.833525	-0.19022	0.694378	0.161423
503	TCGA-DJ-A3V3-01A-21-A301-20	TCGA-DJ-A3V3	THCA	-	Primary	4.45725	-1.06278	-0.0405246	2.53804	-0.632787	-0.540456	-1.12081	0.416574	0.0598379	-0.182592	-0.470442	0.397762	0.00761432	0.487352	-0.413026	-0.274231	0.329184
504	TCGA-BJ-A45F-01A-21-A302-20	TCGA-BJ-A45F	THCA	-	Primary	6.33324	-0.828583	-1.70826	-1.35568	-1.49333	0.128056	0.879751	0.158557	-0.499844	-1.1281	-0.693515	-0.300679	0.742165	-0.107863	0.159773	-0.411044	0.225875
505	TCGA-DJ-A3UZ-01A-21-A301-20	TCGA-DJ-A3UZ	THCA	-	Primary	4.62182	-0.830263	0.0868785	2.20637	0.717536	0.601606	-1.25454	-0.0660787	0.128459	0.261879	0.325682	0.247663	0.125885	0.452794	-0.402542	0.811477	0.18749
506	TCGA-BJ-A45C-01A-21-A302-20	TCGA-BJ-A45C	THCA	-	Primary	4.68413	-0.564184	3.43376	1.38089	1.4767	-1.22079	0.804131	0.283327	-0.104756	-1.05883	-0.385231	-0.138885	0.0107294	-0.387804	-0.393182	-0.288183	-1.0307
507	TCGA-EM-A2CO-01A-21-A21M-20	TCGA-EM-A2CO	THCA	-	Primary	5.25642	-1.6974	-0.462236	1.05252	1.11873	1.16095	-1.43905	0.628025	0.522178	-0.369259	-0.694896	-1.09342	0.413776	0.805958	-0.370411	-0.24605	-0.0660898
508	TCGA-BJ-A45D-01A-21-A302-20	TCGA-BJ-A45D	THCA	-	Primary	4.71421	-0.303221	2.2182	2.14742	0.181815	0.690293	0.317426	-0.414182	-0.12142	0.227193	-0.104526	0.852548	-0.747955	-0.0657334	-0.318218	-0.143627	-0.556874
509	TCGA-DJ-A2QB-01A-21-A21M-20	TCGA-DJ-A2QB	THCA	-	Primary	4.59273	-0.45757	2.08819	1.73942	0.75081	1.05193	-0.0696158	-0.550842	1.04883	0.714316	0.102644	-0.505743	-0.740431	-1.11741	-0.378037	-0.449502	0.610964
510	TCGA-DJ-A1QG-01A-21-A21L-20	TCGA-DJ-A1QG	THCA	-	Primary	5.03714	-1.16362	1.17943	0.133498	2.04652	0.248315	0.257328	-0.455637	-0.195691	-0.711097	0.845528	-1.20196	-0.203215	0.725245	-0.291305	0.0317623	-0.562703
511	TCGA-EM-A3AN-01A-21-A21N-20	TCGA-EM-A3AN	THCA	-	Primary	3.60574	-0.825052	2.68393	0.879502	1.53892	0.189252	0.526034	-0.39889	0.584738	0.487035	-0.0117682	-0.811209	0.0915862	-0.904651	0.304415	-0.158096	0.939915
512	TCGA-DJ-A3VM-01A-21-A301-20	TCGA-DJ-A3VM	THCA	-	Primary	5.78726	-0.951384	1.8776	-0.295642	-0.550838	0.627968	-0.384741	0.948329	1.67919	0.53646	-1.76923	0.854925	-0.0369691	-0.540725	0.148373	0.0521566	-0.432047
513	TCGA-DJ-A2Q8-01A-21-A21M-20	TCGA-DJ-A2Q8	THCA	-	Primary	4.04857	-0.252054	0.089492	2.30043	0.26758	-0.655463	-1.78696	-0.314936	-0.186568	-0.595711	1.94095	-0.105591	-0.0695085	-0.405793	0.0715918	0.218777	-0.575307
514	TCGA-DJ-A4UP-01A-21-A302-20	TCGA-DJ-A4UP	THCA	-	Primary	5.78196	-1.34088	-0.925078	1.52485	-0.794832	0.404695	-0.313038	-0.262073	-0.136026	-0.937678	-0.506286	0.242268	0.0458819	0.469722	-0.491306	0.577734	0.673022
515	TCGA-EM-A4G1-01A-21-A302-20	TCGA-EM-A4G1	THCA	-	Primary	4.77294	-0.769341	0.89246	1.24813	0.804862	-0.191213	0.667753	0.515031	0.615477	-0.226353	-0.200843	-0.409687	0.727973	-0.755621	0.173598	-0.170489	1.11868
516	TCGA-EL-A4KD-01A-21-A302-20	TCGA-EL-A4KD	THCA	-	Primary	6.29618	-1.27574	-0.811119	-1.7387	-1.42319	-0.703785	1.15934	0.222453	0.100909	-1.47614	-0.939864	0.0563905	0.895689	-0.659905	0.260906	-0.366537	-0.000708129
517	TCGA-EL-A4K6-01A-21-A302-20	TCGA-EL-A4K6	THCA	-	Primary	3.68943	-0.423937	3.29229	0.471188	2.45918	-0.916723	1.49197	0.187623	0.0810688	0.024396	-0.989967	0.0463232	-0.268639	0.657934	-0.627818	-0.219738	-0.692593
518	TCGA-BJ-A192-01A-41-A21L-20	TCGA-BJ-A192	THCA	-	Primary	3.53336	1.32706	0.968915	1.96271	-0.161429	0.97843	-0.479778	0.0732064	-1.52869	1.21826	-1.09004	0.988588	-0.686616	-0.688104	-0.669846	0.579756	0.267909
519	TCGA-BJ-A28V-01A-21-A21L-20	TCGA-BJ-A28V	THCA	-	Primary	7.82446	-1.23139	-2.03909	-2.47322	1.25081	0.964393	-0.761513	-0.800771	1.03535	-0.712372	0.431421	-1.44083	-0.37058	0.282945	0.0345944	-0.626218	-0.232431
520	TCGA-BJ-A0ZJ-01A-21-A21L-20	TCGA-BJ-A0ZJ	THCA	-	Primary	3.61978	-0.187569	3.21538	0.817479	1.95912	-0.912419	1.10852	-0.474223	-0.526039	-0.207502	0.438621	0.248344	-0.436961	0.321097	-0.300763	0.663572	-0.29798
521	TCGA-E8-A416-01A-21-A301-20	TCGA-E8-A416	THCA	-	Primary	3.54878	-0.26514	1.72453	2.88443	-0.475256	0.163159	-0.624302	0.487305	-0.122038	0.810065	0.687173	0.138652	0.372969	-0.0656471	0.300247	0.509066	-0.264921
522	TCGA-FE-A233-01A-21-A21M-20	TCGA-FE-A233	THCA	+	Primary	7.23495	-0.958231	-2.22597	-2.32369	0.724002	0.888649	0.792001	-0.696801	-0.249455	0.571323	-0.14391	-0.372533	-0.0935005	0.157777	-0.0548619	-0.351811	0.24971
523	TCGA-EL-A4KG-01A-21-A302-20	TCGA-EL-A4KG	THCA	+	Primary	6.9178	-1.09249	-3.05206	-1.41385	1.15265	0.694125	-0.444591	-0.486796	0.15291	-0.0856068	1.17203	-1.1326	-0.499741	1.00565	0.758179	-0.499338	-0.487567
524	TCGA-EL-A4K7-01A-21-A302-20	TCGA-EL-A4K7	THCA	+	Primary	3.57836	1.17576	-0.825149	1.6516	-1.00685	-0.499011	1.15247	0.447624	-1.87389	1.77408	1.38171	1.55901	-0.102663	-0.336371	-0.139925	-0.117918	0.231984
525	TCGA-DJ-A3UU-01A-21-A301-20	TCGA-DJ-A3UU	THCA	+	Primary	6.66616	-0.920535	-3.16281	-1.26151	0.440079	0.333437	0.142098	-0.673247	0.286283	0.929068	-0.672135	0.264121	-0.672885	0.680463	0.0354943	0.248365	1.17124
526	TCGA-EL-A3CS-01A-11-A21N-20	TCGA-EL-A3CS	THCA	+	Primary	5.40766	-1.39756	-3.0292	0.576109	-2.39279	-0.711483	1.87361	-0.893878	-1.18229	-1.49824	-0.510012	1.13427	-1.39547	-1.82603	2.09017	-1.21332	0.769688
527	TCGA-EL-A3MY-01A-21-A21M-20	TCGA-EL-A3MY	THCA	+	Primary	3.94566	0.887277	-1.50181	0.44668	-2.26473	1.53083	1.68757	-0.791967	-2.82598	-0.599353	-0.885848	-0.0535145	0.512418	0.340014	0.467722	0.0898805	0.275077
528	TCGA-DJ-A2Q7-01A-21-A21M-20	TCGA-DJ-A2Q7	THCA	+	Primary	6.97284	-0.45483	-2.05952	0.0995383	-0.664609	-0.914156	-1.65544	1.34148	0.236006	-0.412936	0.638087	0.0162959	1.24279	-0.259484	-0.425109	-0.152651	-0.335213
529	TCGA-BJ-A0Z9-01A-21-A21L-20	TCGA-BJ-A0Z9	THCA	+	Primary	6.44851	-0.630362	-3.09283	-0.218622	0.596311	-0.19845	-0.0603772	-0.710497	-0.712866	0.894248	0.212461	0.771288	-0.677963	0.466122	0.246435	-0.0496811	0.171127
530	TCGA-DJ-A2PQ-01A-21-A21M-20	TCGA-DJ-A2PQ	THCA	+	Primary	4.83808	0.00553496	0.219664	-0.656739	0.747272	-0.288092	1.8175	-0.283464	-0.689638	0.185698	0.191838	0.529272	-0.150535	0.436787	0.263971	0.128567	-0.303608
531	TCGA-EM-A22I-01A-21-A21N-20	TCGA-EM-A22I	THCA	+	Primary	5.77301	-0.433076	-1.45035	-0.00748531	-1.12984	-0.0133538	0.238514	-1.02976	-1.2815	0.208959	1.50578	1.22099	0.232474	-0.636226	-0.821822	1.65104	0.154922
532	TCGA-DJ-A1QE-01A-11-A21L-20	TCGA-DJ-A1QE	THCA	+	Primary	5.5371	-0.192037	1.05174	-2.88674	-0.970265	-2.0054	0.433201	0.0880405	-0.0826187	2.4367	-0.124582	0.830874	0.342297	0.0137908	0.551427	-0.506654	0.389361
533	TCGA-DE-A4MC-01A-21-A302-20	TCGA-DE-A4MC	THCA	+	Primary	6.26868	-0.491638	-2.07947	1.16506	-1.29051	-0.148671	-1.19521	0.555389	0.0563888	-1.60722	0.178536	0.125476	0.0257204	-0.547093	0.16351	-0.813684	-0.151973
534	TCGA-E3-A3E5-01A-21-A21L-20	TCGA-E3-A3E5	THCA	+	Primary	6.7178	-0.0170547	-1.61683	-0.18988	-0.673935	-1.28475	-0.845022	1.07532	-0.253815	-0.112925	1.39896	0.146685	1.44067	-0.394112	0.0321463	0.308746	-0.229802
535	TCGA-IM-A41Y-01A-21-A302-20	TCGA-IM-A41Y	THCA	+	Primary	5.1182	-0.532848	-1.99319	-0.24646	0.0934904	0.781762	-0.010336	-0.977336	0.618736	1.89221	0.0368426	-0.262136	-1.01692	0.664682	1.779	-0.28453	0.289175
536	TCGA-EL-A3GY-01A-11-A21L-20	TCGA-EL-A3GY	THCA	+	Primary	8.35785	-0.922	-1.23076	-5.66017	2.76214	-0.478348	-1.9242	0.599748	1.89601	0.713797	-0.70813	-0.776613	-0.0933729	-0.975071	-0.630155	-1.10774	-0.266688
537	TCGA-DJ-A13V-01A-21-A21L-20	TCGA-DJ-A13V	THCA	+	Primary	6.19353	-0.236989	-2.39542	0.640883	-0.083323	-0.896008	-1.40513	0.805979	-0.571935	-0.242494	0.686881	-0.376856	0.324212	-0.71645	0.0684443	-0.481775	-0.235504
538	TCGA-EL-A4JX-01A-21-A302-20	TCGA-EL-A4JX	THCA	+	Primary	7.26356	-0.736754	-3.0787	-1.24838	-0.327114	-0.0828744	-1.19847	-0.0726111	0.862975	0.960094	0.224864	-0.499075	-0.352363	-0.450321	0.230483	0.243865	-0.150103
539	TCGA-BJ-A45J-01A-21-A302-20	TCGA-BJ-A45J	THCA	+	Primary	4.20625	-0.427263	1.58863	0.993919	-0.591232	-0.873924	0.946135	0.354188	0.401917	0.831155	0.329264	-0.151453	1.05349	-1.08531	0.101648	-0.71686	0.631273
540	TCGA-EL-A3D1-01A-21-A21N-20	TCGA-EL-A3D1	THCA	+	Primary	4.74303	-0.897226	0.939772	1.22586	-0.833834	0.902942	-1.46785	-0.652225	0.96127	1.92078	0.513695	-0.71391	-0.243841	0.41805	0.634429	-0.47632	-0.502727
541	TCGA-EM-A2P1-01A-21-A21M-20	TCGA-EM-A2P1	THCA	+	Primary	4.36742	0.530436	-0.444555	-0.43233	-0.609255	0.143342	0.697453	-1.38564	-0.132541	1.05086	0.129517	0.693918	-1.0885	1.07406	1.69316	0.468061	0.0292835
542	TCGA-GE-A2C6-01A-21-A21N-20	TCGA-GE-A2C6	THCA	+	Primary	4.39154	1.04545	1.28147	-0.787817	-2.32313	1.03406	0.872517	-0.434229	-0.73154	1.44888	-0.735019	0.358961	0.126706	0.475324	0.457317	0.00686297	-0.253362
543	TCGA-DJ-A2PN-01A-41-A21M-20	TCGA-DJ-A2PN	THCA	+	Primary	3.09253	-0.546618	0.503794	1.68404	-1.57507	-1.36266	2.28512	0.173689	-0.613235	0.925837	0.616608	-0.389596	-0.368103	1.69854	0.462009	-0.225593	-0.465828
544	TCGA-EL-A3CV-01A-21-A21N-20	TCGA-EL-A3CV	THCA	+	Primary	4.98921	-0.490652	2.77906	1.04022	1.59973	-0.527946	1.42603	-0.0121648	-0.0860333	-1.04679	0.155893	0.00782912	0.122829	-0.838887	0.586305	0.523101	-0.78042
545	TCGA-DJ-A1QD-01A-21-A21L-20	TCGA-DJ-A1QD	THCA	+	Primary	3.13759	-1.63144	-1.70626	3.66795	-0.383329	0.125327	0.121824	0.943596	0.100967	0.878346	-1.03884	-0.131179	-1.75459	-0.0789164	1.92314	-1.23329	0.13506
546	TCGA-EM-A1CU-01A-21-A21M-20	TCGA-EM-A1CU	THCA	+	Primary	5.74057	-0.813721	-2.08072	0.184612	0.0233135	0.16829	-0.997224	1.26147	-0.405108	-0.126989	0.266143	0.129952	0.821583	0.413691	0.354158	-0.163989	0.119177
547	TCGA-L6-A4ET-01A-21-A302-20	TCGA-L6-A4ET	THCA	+	Primary	3.62909	-0.400901	2.02578	-0.296091	2.07074	-0.689703	2.51642	-0.806262	0.511854	0.475511	0.785862	-0.465677	-0.422478	-1.07428	0.545356	-1.15864	1.70927
548	TCGA-ET-A25O-01A-21-A21N-20	TCGA-ET-A25O	THCA	+	Primary	3.73106	0.574634	-0.631358	2.47377	-0.69175	-1.6254	1.29332	-0.233964	-2.01386	0.458645	1.99586	0.690178	0.179962	0.0745058	0.249502	1.31287	0.614347
549	TCGA-E8-A437-01A-21-A301-20	TCGA-E8-A437	THCA	+	Primary	6.13588	-0.117453	-0.888108	-0.16966	0.683591	-0.754566	-0.20875	-0.372889	-1.57949	0.495631	2.52002	0.267434	0.839445	-0.0665941	0.347349	1.89355	-0.0541454
550	TCGA-EL-A3ZL-01A-21-A301-20	TCGA-EL-A3ZL	THCA	+	Primary	2.0365	-0.399922	-1.00204	2.62851	-0.0601161	-0.635365	-0.592167	0.69442	-1.01306	2.05168	0.85431	1.33903	-0.098688	-0.00104905	0.0270435	-0.582388	0.255229
551	TCGA-EL-A3ZO-01A-21-A301-20	TCGA-EL-A3ZO	THCA	+	Primary	6.35105	-0.91492	-1.14401	-0.884835	-1.09082	0.780214	0.623342	-0.550986	-0.712169	-0.915159	0.718257	-0.30882	1.77832	0.386283	0.203082	0.367571	0.0351389
552	TCGA-EM-A3O3-01A-21-A301-20	TCGA-EM-A3O3	THCA	+	Primary	3.71185	0.102111	-0.534612	2.24579	-0.69752	0.952472	0.36437	-0.541583	-0.810007	0.495284	0.657743	1.58595	-0.873083	0.408658	0.865005	-0.387377	-0.000982117
553	TCGA-EL-A3CP-01A-21-A21N-20	TCGA-EL-A3CP	THCA	+	Primary	6.47493	-0.233475	-1.89213	0.186187	0.0540663	0.335848	-0.0858129	0.0559481	-0.466238	-0.597894	-0.205136	1.2846	-0.24295	0.216228	-0.177139	-0.233828	0.575592
554	TCGA-EL-A4K1-01A-21-A302-20	TCGA-EL-A4K1	THCA	+	Primary	8.51988	-1.24812	-3.0498	-2.94598	2.20963	1.06419	0.820023	-0.0943758	-0.00950064	-1.13394	-0.854091	0.160731	-0.52391	0.437543	-0.643179	0.274318	0.162585
555	TCGA-DJ-A1QM-01A-21-A21L-20	TCGA-DJ-A1QM	THCA	+	Primary	6.64543	-0.971893	-3.80728	-0.159944	1.25358	0.146629	-0.470045	-0.611381	-0.245693	1.58757	-0.454733	0.366525	-1.34316	0.660255	0.502673	-0.558349	1.05675
556	TCGA-E8-A2JQ-01A-21-A21M-20	TCGA-E8-A2JQ	THCA	+	Primary	6.13556	-0.299266	-3.48811	1.19966	-1.68227	-1.75223	-0.412624	0.183925	-1.0226	0.0967636	1.67763	-0.285665	0.532649	-0.794023	-0.160403	0.0646144	-0.552563
557	TCGA-CE-A3ME-01A-21-A21L-20	TCGA-CE-A3ME	THCA	+	Primary	6.80829	0.192422	-1.31932	-1.57138	0.615399	-0.263199	-0.15437	0.425389	-0.123334	1.68497	-0.433917	1.14306	-0.169489	-0.051952	-0.426667	0.550575	-0.197505
558	TCGA-FE-A3PC-01A-21-A301-20	TCGA-FE-A3PC	THCA	+	Primary	7.27561	-1.09149	-1.96461	-3.10152	-0.0299936	0.543793	-0.0424938	-0.912129	0.171475	0.798311	-0.483539	0.335936	0.026856	0.952862	-0.589488	0.52348	0.590582
559	TCGA-DO-A1K0-01A-21-A21M-20	TCGA-DO-A1K0	THCA	+	Primary	7.85014	-1.68571	-3.18564	-2.04921	1.67325	0.0760028	0.229103	0.561141	0.431406	-0.512591	-0.3994	-0.627026	-0.64076	-0.152753	0.184582	-0.443144	-0.411057
560	TCGA-EL-A3MZ-01A-21-A21M-20	TCGA-EL-A3MZ	THCA	+	Primary	4.86041	0.194877	-0.242523	2.3576	-0.271022	-0.3725	-1.15876	1.05085	-0.370278	-0.0689944	-0.16388	1.17604	0.444555	0.203109	-0.103963	1.08271	0.323762
561	TCGA-J8-A42S-01A-21-A301-20	TCGA-J8-A42S	THCA	+	Primary	4.71553	-0.0498755	-2.11323	0.421341	-0.611529	-0.360597	-0.0999665	-0.644192	0.373288	1.80264	-0.292583	0.289831	-1.26055	0.273042	0.718527	0.0467022	0.335273
562	TCGA-DJ-A1QN-01A-21-A21L-20	TCGA-DJ-A1QN	THCA	+	Primary	4.32783	-0.717071	-0.230609	2.00842	-2.02759	0.661813	0.601037	0.316868	-1.03175	-1.08689	0.0308705	0.9683	0.359182	-0.0564115	0.00199391	-0.42718	0.366596
563	TCGA-E8-A414-01A-21-A301-20	TCGA-E8-A414	THCA	+	Primary	5.29366	-0.887614	-2.34216	-0.759863	0.252501	-0.0664552	-0.999827	0.524187	-0.231013	1.27888	-0.709504	0.128085	-0.538391	0.0451744	-0.48314	-0.116203	-0.482696
564	TCGA-EL-A3H7-01A-21-A21M-20	TCGA-EL-A3H7	THCA	+	Primary	6.19054	-0.683881	-4.13753	0.556314	-0.268477	-0.542373	-0.849137	-0.349514	0.16447	1.01871	-0.844359	0.235754	-1.13362	-1.0295	1.0434	-0.424282	0.273396
565	TCGA-EL-A3T1-01A-21-A301-20	TCGA-EL-A3T1	THCA	+	Primary	7.09331	-0.341588	-1.82361	-1.46282	0.490177	-0.414801	0.808072	-0.294391	-0.961272	0.485788	0.825781	0.469592	0.105671	0.661692	-0.772565	0.826626	0.448852
566	TCGA-EL-A3T3-01A-21-A301-20	TCGA-EL-A3T3	THCA	+	Primary	5.2531	-0.134105	-1.04613	-0.384193	-0.279003	0.856547	1.19317	-1.25879	-0.677488	0.952521	0.853224	0.450828	-1.27186	0.535247	0.657109	0.693464	-0.19934
567	TCGA-EL-A3GZ-01A-21-A21L-20	TCGA-EL-A3GZ	THCA	+	Primary	6.70549	-0.493502	-2.00211	-1.00693	-0.65289	-0.425228	1.1898	-0.0773915	-1.11657	-0.428768	1.1218	0.257946	0.552005	0.0657023	0.314695	1.28523	0.530073
568	TCGA-EM-A3SX-01A-21-A301-20	TCGA-EM-A3SX	THCA	+	Primary	6.32447	-0.621682	-2.22129	0.105506	0.492796	-1.16015	-0.648664	0.175906	-0.13222	0.426335	1.0327	-0.103454	1.01811	-0.0833435	0.0135144	0.631841	0.528999
569	TCGA-ET-A2MY-01A-21-A21M-20	TCGA-ET-A2MY	THCA	+	Primary	4.77348	0.61942	-1.00329	3.11546	-0.890522	-1.33746	-0.950248	1.67651	-0.44735	0.390607	1.34814	0.441856	0.692858	-0.622229	-0.0512917	0.394625	-0.333402
570	TCGA-EL-A3MX-01A-21-A21L-20	TCGA-EL-A3MX	THCA	+	Primary	4.97817	0.293258	2.18672	-1.48151	1.8335	-2.02431	2.74805	-0.219827	-0.916359	0.602905	-0.164035	0.98724	-1.11434	0.0176906	-0.708684	0.115206	-0.786753
571	TCGA-EL-A4JW-01A-21-A302-20	TCGA-EL-A4JW	THCA	+	Primary	6.13036	-0.973928	-1.90902	-0.732703	-1.73269	0.247046	2.13724	-0.544794	-0.255475	-1.0832	-0.0561733	0.337029	0.160943	-1.02618	1.18933	-0.0757024	-0.0426315
572	TCGA-FE-A231-01A-21-A21M-20	TCGA-FE-A231	THCA	+	Primary	4.73466	-0.371383	-1.64725	1.77945	-0.477546	-0.910944	-0.509682	0.712106	-1.22086	0.21342	0.88634	-0.135454	0.344166	0.361344	-0.510863	0.0484155	-0.128898
573	TCGA-EM-A1CV-01A-21-A21M-20	TCGA-EM-A1CV	THCA	+	Primary	5.6556	-0.772251	-2.98269	-0.275609	-0.447506	-0.150273	0.126892	-0.235736	-0.00552773	1.01111	-0.516254	-0.0709955	-0.985087	0.416333	0.286997	-0.10478	0.253801
574	TCGA-EL-A3N2-01A-21-A21M-20	TCGA-EL-A3N2	THCA	+	Primary	6.18002	-0.614817	-0.377659	0.57623	0.414507	0.377785	-1.32459	0.535969	0.0647356	-0.688251	0.354787	0.928789	-0.0452748	-0.241388	-0.74952	0.12877	-0.205822
575	TCGA-CE-A483-01A-21-A302-20	TCGA-CE-A483	THCA	+	Primary	6.87877	-0.803387	-1.77181	-2.94464	2.40772	0.0585171	0.957777	0.0353309	-0.401441	0.178786	-0.494235	-0.0571668	-0.287008	0.980651	-0.731778	-0.36633	-0.0916259
576	TCGA-H2-A422-01A-21-A301-20	TCGA-H2-A422	THCA	+	Primary	6.75922	-0.867435	-2.28893	-1.26633	0.751995	-0.612655	-0.516805	0.813561	0.673492	-0.494946	-0.253977	-0.169683	0.515568	0.0389495	0.218737	-0.811108	0.454799
577	TCGA-DJ-A3VE-01A-21-A301-20	TCGA-DJ-A3VE	THCA	+	Primary	3.7561	0.444986	-1.83173	0.982404	-0.205707	-0.346922	1.36814	-0.507248	-1.07107	1.78494	0.854094	0.732252	-0.324668	1.17621	0.806358	0.294669	0.421555
578	TCGA-EL-A3H4-01A-21-A21L-20	TCGA-EL-A3H4	THCA	+	Primary	6.31228	-0.282336	-2.63696	-0.283513	-0.0343287	-1.03571	1.01187	0.24651	-0.945747	-0.622734	0.227588	0.0843126	0.253412	-1.00467	1.25435	0.000117641	-0.0313711
579	TCGA-EL-A3D6-01A-21-A21N-20	TCGA-EL-A3D6	THCA	+	Primary	4.541	-1.50003	-0.172648	2.06401	-1.93126	0.98546	-0.158271	-0.198184	0.214782	-0.893074	-0.547651	0.748287	0.245841	0.365578	-0.289644	0.0607133	0.425564
580	TCGA-ET-A39P-01A-41-A21N-20	TCGA-ET-A39P	THCA	+	Primary	5.82561	-1.03494	-0.706398	-1.755	1.33672	-0.926428	0.892546	-0.047281	-0.15994	0.642624	-1.02685	-0.12214	-0.471334	1.319	0.011075	-0.571121	-0.288874
581	TCGA-E8-A2EA-01A-21-A21M-20	TCGA-E8-A2EA	THCA	+	Primary	2.65602	-1.5286	-2.166	2.56062	-0.704125	-0.708315	0.280035	0.628928	-0.473594	1.59692	-0.540712	1.1468	-0.483007	0.556218	0.59693	-1.38543	0.882822
582	TCGA-EL-A3D0-01A-21-A21N-20	TCGA-EL-A3D0	THCA	+	Primary	3.81193	0.0449825	-0.185387	2.12385	-0.461377	-0.312202	-1.45277	0.485708	-0.566648	0.114415	0.505662	-0.322942	0.303603	-0.0308308	0.813698	-0.996287	0.300142
583	TCGA-DJ-A3UY-01A-41-A302-20	TCGA-DJ-A3UY	THCA	+	Primary	3.69034	1.18751	1.3635	1.44359	0.448054	0.830374	-1.14809	-0.0631246	-0.821192	0.0158195	-0.646975	1.47575	-0.930603	-0.166469	-0.21701	0.158337	0.0109935
584	TCGA-MK-A4N9-01A-21-A302-20	TCGA-MK-A4N9	THCA	+	Primary	6.94743	-1.14374	-0.367002	-1.62094	-1.41602	1.04041	0.437605	-0.744876	0.451782	-0.865966	-1.32861	0.460758	-0.29687	0.686976	-0.531364	0.800645	0.460767
585	TCGA-EL-A3CT-01A-21-A21N-20	TCGA-EL-A3CT	THCA	+	Primary	4.36905	-1.39136	-2.79253	2.27667	-0.868075	-1.18227	-0.389994	1.31627	-0.554822	0.317819	0.367243	-0.0528577	0.371013	-0.00942936	0.277338	-0.801932	0.317935
586	TCGA-EL-A3CN-01A-21-A21N-20	TCGA-EL-A3CN	THCA	+	Primary	6.55227	-0.256585	0.056147	-1.9449	0.802646	-1.03254	1.41093	-0.380016	0.686839	-0.57174	2.10384	-1.41683	1.13273	-1.30436	-0.380161	0.294204	0.35436
587	TCGA-ET-A3DW-01A-21-A21N-20	TCGA-ET-A3DW	THCA	+	Primary	6.92013	-1.20493	-1.30976	-2.82951	-1.74617	0.194124	1.88611	-0.454133	0.288867	-1.36889	-0.504773	-0.306799	0.666219	-0.637268	0.236199	-0.0838039	0.0891492
588	TCGA-BJ-A3PU-01A-21-A301-20	TCGA-BJ-A3PU	THCA	+	Primary	4.75053	0.280497	1.25923	-1.40875	0.636912	-0.964133	3.25298	-0.627753	-1.37221	0.378784	0.584342	0.78182	0.142251	0.672597	-0.145943	0.396208	-0.334842
589	TCGA-DJ-A3V0-01A-21-A301-20	TCGA-DJ-A3V0	THCA	+	Primary	5.33373	0.873939	1.16544	-2.07429	2.37058	-2.21681	2.64696	0.377666	-1.34328	0.945555	0.975894	0.116263	-0.305047	0.946129	-0.84887	-0.0834214	-0.559584
590	TCGA-ET-A40Q-01A-21-A301-20	TCGA-ET-A40Q	THCA	+	Primary	6.16675	-0.993856	-1.18954	0.299474	0.964448	0.945997	-1.46457	0.789626	0.458377	-0.135341	-0.0806417	0.350097	-0.0323274	0.656148	-0.826694	0.188222	0.616546
591	TCGA-ET-A2N4-01A-21-A21N-20	TCGA-ET-A2N4	THCA	+	Primary	4.50288	-0.674787	3.45247	0.933476	1.17788	-0.729489	0.963591	-0.303206	-0.190989	-0.261274	-0.50697	0.263649	0.0655654	0.626928	-0.986616	0.274497	-0.93675
592	TCGA-E8-A419-01A-21-A301-20	TCGA-E8-A419	THCA	+	Primary	6.49574	-0.316422	-0.905257	-1.04397	0.714984	0.52407	-0.683295	0.36664	0.579261	0.282677	0.355501	-1.00343	0.204484	-0.427035	-0.335909	0.0813259	-0.267244
593	TCGA-EL-A3GU-01A-21-A21M-20	TCGA-EL-A3GU	THCA	+	Primary	5.74311	-0.893935	0.0884429	-2.34829	0.174118	-0.776071	3.34572	-0.121351	-0.901996	-1.02567	-0.500908	0.134257	0.21449	0.321444	0.527288	-0.280251	-0.484169
594	TCGA-E3-A3E1-01A-21-A21N-20	TCGA-E3-A3E1	THCA	+	Primary	7.10781	-1.61983	-2.7374	-0.490602	-0.069899	0.19932	0.156247	-0.0825528	-0.380787	-1.3766	-0.0737295	-0.586412	0.324408	-0.630232	0.685754	-0.139996	0.130896
595	TCGA-EL-A4K4-01A-21-A302-20	TCGA-EL-A4K4	THCA	+	Primary	5.85302	-2.08746	-0.225382	0.751338	-1.65622	0.68543	0.92325	-0.775687	-0.151145	-1.09417	-1.09195	0.468561	0.387548	0.784605	0.121136	0.12782	0.354529
596	TCGA-EL-A3GS-01A-21-A21L-20	TCGA-EL-A3GS	THCA	+	Primary	3.83753	-0.544717	1.88569	1.80314	-0.432534	0.238096	0.39609	-0.125143	0.0424874	0.0726437	-0.778271	0.969009	0.037867	0.00924734	-0.277589	0.299985	-0.149463
597	TCGA-EL-A3T6-01A-21-A301-20	TCGA-EL-A3T6	THCA	+	Primary	7.53592	-1.24362	-0.871147	-0.0894033	-0.597861	0.448193	-1.28074	-0.115915	0.701247	-1.5891	0.0683646	-0.715392	-0.0419108	-0.246571	0.0199185	-0.457467	-1.22058
598	TCGA-DJ-A1QF-01A-21-A21L-20	TCGA-DJ-A1QF	THCA	+	Primary	6.4527	-1.37305	-2.0888	1.06439	-0.13567	-0.656246	-1.19762	1.1642	0.594618	-1.41098	-0.451112	-0.306956	0.545683	0.248906	0.346188	-0.925364	0.531823
599	TCGA-EL-A3CR-01A-21-A21N-20	TCGA-EL-A3CR	THCA	+	Primary	5.02017	-0.561602	2.14011	-1.49975	-0.882919	0.504969	0.675754	-0.775661	-0.0362471	-0.0605329	-0.611507	0.282929	0.852599	0.540939	-0.132074	0.615993	1.01569
600	TCGA-DJ-A2PS-01A-21-A21M-20	TCGA-DJ-A2PS	THCA	+	Primary	3.53777	0.669284	2.13751	1.16929	-0.688972	-0.556125	0.900582	-0.411546	-1.37697	-0.864101	-0.896879	0.691649	-0.284568	-0.17335	0.685892	-1.26939	0.351622
601	TCGA-DJ-A3V7-01A-21-A301-20	TCGA-DJ-A3V7	THCA	+	Primary	3.90612	-0.292248	1.2817	1.05709	1.18785	-0.51108	1.29144	0.110526	-0.397276	-0.224645	-0.574342	0.212928	-0.173331	0.484003	-0.0332657	-0.64141	0.0592969
602	TCGA-EM-A22O-01A-21-A21M-20	TCGA-EM-A22O	THCA	+	Primary	4.98866	-1.20372	2.42774	0.999156	1.45966	-0.204388	-0.139691	-0.0348644	1.053	-0.74548	0.46924	-1.24638	1.28243	-0.625165	-0.290003	0.376559	0.42298
603	TCGA-EM-A22M-01A-21-A21N-20	TCGA-EM-A22M	THCA	+	Primary	5.10473	-0.626703	0.864361	0.977633	0.387347	-0.304977	0.412777	-0.0149073	-0.282418	0.391549	0.211437	0.17707	-0.0762368	0.553813	-0.0786716	0.582576	-0.222145
604	TCGA-IM-A3ED-01A-21-A21L-20	TCGA-IM-A3ED	THCA	+	Primary	4.22607	-0.61764	2.54966	1.70096	0.783933	0.655302	0.369858	-0.38356	0.885064	0.239285	0.358472	-0.73603	0.138746	-0.805573	-0.105746	-0.401329	0.855417
605	TCGA-J8-A3NZ-01A-21-A21M-20	TCGA-J8-A3NZ	THCA	+	Primary	7.91613	-1.23104	-1.52987	-0.840713	0.343368	-0.00379404	-0.109805	-0.0627945	0.437568	-0.292928	-1.35832	0.55359	-0.591668	0.436783	-0.477423	0.0204047	0.351121
606	TCGA-BJ-A18Z-01A-11-A21L-20	TCGA-BJ-A18Z	THCA	+	Primary	5.46473	-1.5494	1.24147	1.79317	0.00887336	0.203667	-1.10976	-0.321773	0.0514987	-1.04465	-0.040285	0.319379	0.110695	0.971924	-0.706289	1.28619	0.254894
607	TCGA-J8-A3O2-01A-21-A302-20	TCGA-J8-A3O2	THCA	+	Primary	4.35499	-0.946266	1.40317	3.04993	0.262544	1.31058	-0.906029	-0.335038	0.24038	-0.552943	0.839828	-0.372656	-0.0226411	-0.648278	0.995087	-0.124264	-0.414327
608	TCGA-ET-A25G-01A-21-A21N-20	TCGA-ET-A25G	THCA	+	Primary	6.73742	-1.5045	0.0677578	0.839406	-0.53135	1.53353	-1.05325	-0.619178	0.384291	-1.24754	-0.130892	0.178491	-0.115332	-0.048268	-0.448738	0.856406	0.067832
609	TCGA-DJ-A2PZ-01A-11-A21M-20	TCGA-DJ-A2PZ	THCA	+	Primary	4.39049	0.743293	1.2474	1.6976	-1.83166	0.278378	-1.0597	0.256921	-0.21593	1.52398	-0.393298	-0.382868	-0.816694	-0.837188	-0.0336533	-0.88948	-1.52395
610	TCGA-EL-A3ZQ-01A-21-A301-20	TCGA-EL-A3ZQ	THCA	+	Primary	5.62887	-0.62253	0.695829	0.503824	-0.396871	0.634315	-0.388638	-0.0838148	0.25949	-0.419764	0.343591	-0.509339	0.348265	-0.0794138	0.074784	-0.172672	0.00283382
611	TCGA-DJ-A3UN-01A-21-A301-20	TCGA-DJ-A3UN	THCA	+	Primary	3.63237	-1.31581	0.903457	2.04213	-1.15629	0.878873	-1.08495	-0.204563	0.475293	1.61738	-0.282617	0.403157	0.246995	0.572686	-0.435878	0.234295	0.305142
612	TCGA-DJ-A2Q4-01A-11-A21M-20	TCGA-DJ-A2Q4	THCA	+	Primary	3.89315	-0.0829389	2.05387	1.9636	-0.487255	-0.50457	-0.0979876	0.498798	0.682514	0.644598	0.0586531	-0.400856	-0.410434	-0.741996	-0.0850941	-1.07759	0.0171636
613	TCGA-E8-A417-01A-41-A302-20	TCGA-E8-A417	THCA	+	Primary	6.36768	-1.31431	0.504312	-0.342003	-0.537061	1.36981	0.158212	0.00845764	0.587313	-0.76098	-1.40928	0.895459	0.0466865	0.469306	-0.44565	0.63756	-0.0318199
614	TCGA-EM-A1CT-01A-21-A21M-20	TCGA-EM-A1CT	THCA	+	Primary	4.10927	-0.386233	2.18877	1.51251	1.80294	-1.16146	1.1872	0.631863	-0.183541	-1.11039	-0.155161	-0.441968	-0.0589674	-0.659227	0.878482	-0.716299	-0.651254
615	TCGA-EL-A3GX-01A-21-A21L-20	TCGA-EL-A3GX	THCA	+	Primary	7.76289	-2.24648	-0.721556	-0.417651	1.04314	0.61474	-2.69301	0.545352	1.79568	-1.47037	0.123071	-1.20455	0.283574	0.404827	-1.11372	0.11867	-0.304118
616	TCGA-E8-A413-01A-11-A301-20	TCGA-E8-A413	THCA	+	Primary	4.3643	-0.788634	1.01153	1.47588	0.51775	0.0139552	-0.0929769	0.155406	0.444232	-0.589885	0.467969	0.137268	0.659608	0.283681	-0.0785377	-0.0793623	0.830392
617	TCGA-BJ-A4O8-01A-21-A302-20	TCGA-BJ-A4O8	THCA	+	Primary	4.62855	-0.671129	2.34444	-0.509302	1.71015	-0.830068	0.93188	-0.382646	0.684219	-0.327715	0.717119	-0.741923	0.944749	-0.996156	0.583	0.191201	0.865557
618	TCGA-KS-A4I5-01A-21-A302-20	TCGA-KS-A4I5	THCA	+	Primary	4.54705	-0.892013	0.818509	2.86508	-0.598055	0.727526	-0.868794	0.805467	0.425603	-0.0164986	-0.775915	0.388277	-0.296466	-0.777249	0.898754	-0.713333	0.0592703
619	TCGA-EL-A3N3-01A-21-A21M-20	TCGA-EL-A3N3	THCA	+	Primary	5.93864	-0.917359	1.80377	-0.675356	1.17143	-0.0142738	0.688471	-0.635566	1.39167	-1.00662	0.42878	-1.13893	0.568855	-1.07881	-0.488419	-0.144414	0.609336
620	TCGA-BJ-A28X-01A-21-A302-20	TCGA-BJ-A28X	THCA	+	Primary	4.66942	-1.33376	1.11486	1.45825	1.10835	0.466466	0.399001	-0.225752	1.19357	-0.199696	0.274383	-1.04646	0.661723	-0.103768	-0.310812	-0.156846	0.756809
621	TCGA-KS-A4IB-01A-21-A302-20	TCGA-KS-A4IB	THCA	+	Primary	3.43693	0.38092	1.49087	1.74375	1.36542	2.06618	-0.41564	-0.790234	-0.52028	0.0833974	-0.673232	0.0341684	-0.907745	0.276644	0.526755	-0.195313	0.107265
622	TCGA-E8-A44K-01A-11-A302-20	TCGA-E8-A44K	THCA	+	Primary	4.79727	-0.850434	3.15663	1.39314	-0.200389	0.511231	-0.0397618	-0.23204	0.047209	-0.239181	-0.696058	0.185226	0.0352261	-0.132232	-0.178905	1.39492	-1.10402
623	TCGA-FE-A234-01A-21-A21M-20	TCGA-FE-A234	THCA	+	Primary	4.80267	-0.536408	1.13832	1.49295	-0.00853038	-0.875153	-0.382872	0.0144116	0.187191	-0.255211	1.47799	-0.417085	0.781399	-0.85478	0.0548417	0.801307	-0.217181
624	TCGA-E8-A433-01A-21-A301-20	TCGA-E8-A433	THCA	+	Primary	4.22037	-0.932801	2.62145	1.38345	1.15756	-0.29027	1.09905	-0.110918	-0.00687855	-0.219921	-0.979409	0.336761	-0.494296	0.559706	-0.469825	-0.670224	-0.44358
625	TCGA-EL-A3TA-01A-21-A301-20	TCGA-EL-A3TA	THCA	+	Primary	4.57591	-0.274097	1.87109	0.559437	0.478114	-0.750846	2.15035	0.181964	-0.819053	-0.917558	-0.414708	0.28056	0.0808256	-0.422925	0.711143	-0.787967	0.0244784
626	TCGA-BJ-A45H-01A-21-A302-20	TCGA-BJ-A45H	THCA	+	Primary	5.48655	-0.972268	-0.168842	1.37941	-1.38546	-0.1984	-0.820423	0.593494	0.892576	-1.03188	-0.138666	0.368363	0.732926	0.291315	0.02091	0.124889	0.493237
627	TCGA-DJ-A2Q5-01A-21-A21M-20	TCGA-DJ-A2Q5	THCA	+	Primary	3.8707	-0.954826	-0.0130697	3.65661	-0.404617	0.683063	-0.677182	0.442509	0.0506975	-0.358316	-0.353531	0.490677	-0.379143	-1.35324	0.925352	-0.840317	-0.029926
628	TCGA-FY-A3ON-01A-22-A301-20	TCGA-FY-A3ON	THCA	+	Primary	3.97472	-1.07796	1.97008	1.59606	-0.293707	-1.33987	0.265717	0.409847	1.18294	0.501939	0.146761	-0.336263	0.132066	-0.517277	0.279052	-0.518778	0.786457
629	TCGA-BJ-A3EZ-01A-21-A21L-20	TCGA-BJ-A3EZ	THCA	+	Primary	4.1428	-0.548254	1.63132	1.00242	1.08692	-0.0794128	1.56086	0.461954	1.06778	1.11754	0.17792	-0.563156	0.848397	-0.932628	0.451072	-0.630346	1.95518
630	TCGA-ET-A3BT-01A-21-A21N-20	TCGA-ET-A3BT	THCA	+	Primary	4.60666	-0.723096	2.00724	0.0453825	-0.471537	-0.259633	-0.45627	-0.0110938	0.839953	1.24185	-0.013396	-0.127932	0.256417	-0.532348	0.454604	-0.72358	0.082643
631	TCGA-EL-A3MW-01A-21-A21L-20	TCGA-EL-A3MW	THCA	+	Primary	4.20144	-0.502404	2.4508	0.495148	1.2743	-0.371142	1.74866	-0.297174	-0.252155	-0.524978	-0.571314	0.107999	-0.363633	0.636613	-0.0316456	-0.250274	0.198158
632	TCGA-FE-A237-01A-21-A21M-20	TCGA-FE-A237	THCA	+	Primary	2.32046	-0.781964	1.85043	3.53502	-0.373916	-0.0826877	-1.56334	0.261015	0.530496	-0.0968172	-0.0579879	1.65949	-1.38809	-0.592842	-0.287206	-0.0239819	0.466928
633	TCGA-BJ-A28R-01A-21-A21L-20	TCGA-BJ-A28R	THCA	+	Primary	4.67528	-0.514447	1.83381	0.217651	-0.379459	1.11771	0.762056	-1.06832	0.0610462	-0.10849	0.625097	-0.387786	-0.336695	-0.81599	0.25251	-0.750924	-0.232361
634	TCGA-DJ-A3VA-01A-21-A301-20	TCGA-DJ-A3VA	THCA	+	Primary	3.30169	-1.24379	2.25691	1.10825	2.53101	-0.760492	1.37904	0.00357303	0.0373668	-0.00285005	-0.992429	-0.275254	-0.355463	0.807032	-0.435925	-0.938083	-0.0695015
635	TCGA-EM-A3SU-01A-21-A302-20	TCGA-EM-A3SU	THCA	+	Primary	4.42405	-0.664364	1.47022	0.978591	1.28972	-0.154747	1.02637	-0.0979912	0.550349	0.00239024	0.292938	-0.681224	0.901606	-0.744502	0.271934	0.0439199	1.04981
636	TCGA-DJ-A3UO-01A-21-A301-20	TCGA-DJ-A3UO	THCA	+	Primary	3.91181	-0.619598	2.65574	1.60642	1.17771	-0.245972	0.199814	-0.354836	-0.419162	-0.448444	-0.350013	-0.0475221	-0.383513	-0.141257	0.551723	-0.370443	-0.123589
637	TCGA-DJ-A13O-01A-21-A21L-20	TCGA-DJ-A13O	THCA	+	Primary	5.35872	-0.906827	-0.324466	0.262367	-0.263875	0.108786	-0.804893	0.774163	0.713359	-0.55243	-0.43144	-0.363739	0.33384	0.410557	-0.0791125	-0.245389	0.496671
638	TCGA-EL-A3CM-01A-21-A21N-20	TCGA-EL-A3CM	THCA	+	Primary	4.77354	-0.734188	1.31066	1.13348	0.549545	-0.242147	-0.0522936	0.262789	0.525362	-1.05912	-0.100369	-0.433696	0.433843	-0.43354	0.403701	-0.417541	0.890995
639	TCGA-KS-A41F-01A-21-A301-20	TCGA-KS-A41F	THCA	+	Primary	4.0321	-0.0683643	3.07142	0.273486	1.68041	-0.805212	0.688608	-0.62235	-0.47241	0.556631	0.82062	-0.388604	-0.372542	-0.14267	0.276656	-0.0979121	-0.335212
640	TCGA-L6-A4EQ-01A-21-A302-20	TCGA-L6-A4EQ	THCA	+	Primary	7.70342	-1.80682	-1.8378	-1.31038	1.20019	-0.089778	-2.15505	1.73268	1.90557	-0.965874	0.187	-1.0528	0.365987	0.223508	-0.733082	0.332472	-0.694233
641	TCGA-DJ-A4UL-01A-21-A302-20	TCGA-DJ-A4UL	THCA	+	Primary	8.04627	-1.30834	-2.40595	-3.60136	1.04238	0.179323	0.136099	-0.390985	1.13792	-0.110754	-0.158549	-1.10811	-0.0793033	0.0732155	-0.17187	-0.796013	0.406687
642	TCGA-FY-A3BL-01A-21-A21N-20	TCGA-FY-A3BL	THCA	+	Primary	6.11487	-1.71773	-0.457267	2.49212	-0.726356	-0.0952729	-2.56293	0.3205	0.793105	-1.53464	0.609059	-0.867012	-0.250169	0.0170474	-0.521581	-0.0585461	-0.754409
643	TCGA-DJ-A4V2-01A-21-A302-20	TCGA-DJ-A4V2	THCA	+	Primary	4.51798	0.407889	-1.1226	-0.858933	-0.0100504	0.338459	-0.108781	-0.369741	-2.08713	0.120373	-0.590953	-0.871953	0.633147	-0.328134	-0.35092	-0.337357	-0.190184
644	TCGA-DJ-A3VB-01A-21-A301-20	TCGA-DJ-A3VB	THCA	+	Primary	4.13134	-1.63376	1.14318	2.4597	-0.965127	1.23582	-0.876107	-0.735751	0.191354	0.590199	0.109661	0.146793	0.116364	0.725326	-0.40084	0.343643	-0.0995729
645	TCGA-FE-A22Z-01A-21-A21M-20	TCGA-FE-A22Z	THCA	+	Primary	3.68444	-0.246942	3.1729	1.24829	0.432139	-0.991709	0.0659616	0.164465	-0.0746546	1.07294	0.155546	-0.566064	0.817742	-1.34163	0.252242	0.125092	0.0603133
646	TCGA-EL-A3T7-01A-21-A301-20	TCGA-EL-A3T7	THCA	+	Primary	4.85484	-0.527069	2.46021	0.87607	0.310676	-0.638114	1.46772	-0.432632	-0.575475	0.00256538	0.388334	-0.073749	-0.361959	-0.350315	0.102333	-0.305981	-0.728074
647	TCGA-EL-A3T8-01A-11-A301-20	TCGA-EL-A3T8	THCA	+	Primary	4.4902	-1.08796	0.599355	2.20605	-1.97607	0.950653	-0.381274	-0.503571	0.127429	-0.387497	-0.951053	1.08877	0.656851	0.266718	-0.0356905	0.45508	0.246834
648	TCGA-EL-A3CU-01A-21-A21N-20	TCGA-EL-A3CU	THCA	+	Primary	3.92545	-0.648958	2.48372	1.55825	0.915874	-1.08795	0.69793	0.193192	-0.588244	-0.0785893	-0.384599	0.539639	-0.0867788	0.709571	-0.388056	-0.0745762	-0.33639
649	TCGA-EM-A3SZ-01A-21-A301-20	TCGA-EM-A3SZ	THCA	+	Primary	4.43207	-1.51324	0.0837004	2.63633	-2.29166	0.34422	-0.532251	0.455449	0.380902	0.520703	0.438993	-0.233146	0.258624	0.188896	0.0795499	-0.369834	-0.265183
650	TCGA-DJ-A2Q6-01A-21-A21M-20	TCGA-DJ-A2Q6	THCA	+	Primary	5.02108	-0.44397	3.10268	0.848387	1.45737	-0.659031	1.06572	-0.247129	-0.511419	-0.837127	-0.0726513	0.255071	-0.631884	-0.493213	-0.172309	-0.0710845	-1.13614
651	TCGA-BJ-A290-01A-21-A21L-20	TCGA-BJ-A290	THCA	+	Primary	4.49178	-0.426191	1.38077	0.631845	-3.211	0.404037	1.46404	-0.388159	-0.852476	-0.226464	-0.887797	1.12521	0.343108	0.130967	0.142406	0.68187	0.236195
652	TCGA-DJ-A1QO-01A-21-A21M-20	TCGA-DJ-A1QO	THCA	+	Primary	4.27857	0.0229415	2.22381	2.03944	0.295458	-1.08205	0.462061	0.572654	0.0131709	-0.160716	-0.737006	0.955588	0.0544263	-0.01149	-0.839927	0.248479	-0.537907
653	TCGA-ET-A2N0-01A-21-A21M-20	TCGA-ET-A2N0	THCA	+	Primary	5.28176	-0.503591	0.838406	0.752055	-0.118774	-0.59918	-0.162679	0.875661	0.351725	-0.483725	-0.590358	0.47943	0.776365	-0.36199	-0.186446	0.226227	-0.536152
654	TCGA-DJ-A2PO-01A-11-A21L-20	TCGA-DJ-A2PO	THCA	+	Primary	4.47558	-0.465249	0.084891	3.10975	-0.831951	0.649251	-1.61225	-0.0667781	0.524849	1.06215	0.59119	-0.106038	-0.586437	-0.0818697	0.348003	0.035404	0.151303
655	TCGA-FY-A40L-01A-21-A301-20	TCGA-FY-A40L	THCA	+	Primary	7.1898	-1.03529	-1.56346	-1.28072	0.912569	0.656915	0.327167	-0.72477	0.388965	-0.643804	-1.21068	0.265226	-0.762987	0.953012	-0.128864	0.209482	0.25127
656	TCGA-ET-A3BX-01A-21-A21N-20	TCGA-ET-A3BX	THCA	+	Primary	4.65478	-0.846954	1.87908	0.822957	-0.364137	1.85686	-0.659575	-0.105908	1.40458	1.4984	-1.14524	0.81222	-0.852758	0.262769	-0.135342	0.488607	0.146545
657	TCGA-E8-A415-01A-21-A301-20	TCGA-E8-A415	THCA	+	Primary	5.64651	-0.774931	1.58565	-0.255743	0.513818	0.351732	0.698412	-0.221204	-0.143229	-0.707239	-0.420926	0.22656	-0.352509	0.485472	-0.71443	0.180087	-0.533262
658	TCGA-ET-A2MZ-01A-21-A21M-20	TCGA-ET-A2MZ	THCA	+	Primary	4.82599	-0.423908	1.30467	1.00583	0.0857015	-0.830119	-0.409492	0.435948	-0.681758	-0.692133	0.168424	-0.0637866	0.807948	0.0755875	0.297711	0.489314	-0.0763464
659	TCGA-FE-A23A-01A-21-A21M-20	TCGA-FE-A23A	THCA	+	Primary	6.76034	-1.68244	-1.35434	-0.707233	0.323273	0.477519	-0.56258	-0.0826898	0.620074	-0.912719	-0.251753	-0.829761	0.360232	0.196599	0.283886	-0.374517	-0.065528
660	TCGA-DJ-A3VJ-01A-21-A301-20	TCGA-DJ-A3VJ	THCA	+	Primary	4.3699	-1.10916	1.54294	2.5815	-0.965979	1.26319	-0.301735	-0.467355	0.530626	-0.433392	-0.806067	0.9883	-0.434858	-0.590171	-0.328844	0.463757	-0.334673
661	TCGA-DE-A4MA-01A-21-A302-20	TCGA-DE-A4MA	THCA	+	Primary	4.37817	-1.06332	1.67298	1.28299	1.07329	0.332774	0.529112	-0.478378	0.779519	-0.212118	0.214171	-1.09087	0.548978	-0.711058	-0.299191	0.0516498	0.730301
662	TCGA-DJ-A2QA-01A-21-A21M-20	TCGA-DJ-A2QA	THCA	+	Primary	3.24023	-0.284552	0.941579	2.4019	-0.627682	0.445294	-1.22896	0.401869	-0.74347	0.835768	-0.280754	-0.362872	0.108459	0.618223	-0.518687	-0.240335	-0.0784205
663	TCGA-EM-A3FJ-01A-21-A21L-20	TCGA-EM-A3FJ	THCA	+	Primary	5.35055	-0.89748	0.132607	0.408813	1.05267	-0.237679	0.362791	0.293232	-0.280022	-1.0411	-1.25247	0.0140431	-0.259811	0.833237	-0.472882	-0.304012	0.311388
664	TCGA-EL-A3GQ-01A-21-A21L-20	TCGA-EL-A3GQ	THCA	+	Primary	3.78194	-1.0574	2.28236	2.03459	0.162265	0.573795	-1.0498	0.0218304	0.529532	0.0934092	-1.52469	0.59002	-0.22381	0.584634	-0.0495279	-0.0234351	-0.00492721
665	TCGA-J8-A4HY-01A-21-A302-20	TCGA-J8-A4HY	THCA	+	Primary	4.92943	0.506955	2.65457	-4.82157	-2.15669	-0.463019	0.405251	0.113167	1.50273	1.76881	-0.144622	0.450496	0.128622	-2.16951	0.157519	-0.625542	-1.19293
666	TCGA-EL-A4K9-01A-21-A302-20	TCGA-EL-A4K9	THCA	+	Primary	3.96873	0.433321	1.76743	1.28187	-1.20912	0.354385	-1.29634	0.969198	0.510033	0.884257	-0.1089	-0.466329	-0.631261	-0.503526	0.449012	-1.04126	-0.82483
667	TCGA-DJ-A2QC-01A-21-A21M-20	TCGA-DJ-A2QC	THCA	+	Primary	4.66387	-0.574706	1.36493	2.07526	-2.06665	0.291894	-0.426339	-0.869522	-0.42349	0.322019	1.57854	-0.178514	0.313736	-0.307336	1.03783	0.664156	-0.824663
668	TCGA-DE-A4MB-01A-21-A302-20	TCGA-DE-A4MB	THCA	+	Primary	3.76789	0.694055	0.677438	0.544187	0.351698	0.777136	-0.828	0.110508	-0.992339	1.00286	-0.709316	-0.167858	0.257593	0.0820239	-0.0907766	-0.846641	-0.489431
669	TCGA-BJ-A0ZB-01A-21-A21L-20	TCGA-BJ-A0ZB	THCA	+	Primary	3.22536	-0.611492	0.118154	2.73487	-0.628992	0.793048	-1.14967	-0.0124416	-0.247201	1.15637	0.712957	0.249755	0.362863	0.592505	-0.483634	-0.243902	0.361458
670	TCGA-DJ-A3V9-01A-21-A301-20	TCGA-DJ-A3V9	THCA	+	Primary	4.94229	-0.23635	1.18677	0.0871828	0.213381	-0.958752	0.246226	0.0914825	-0.644039	-0.417656	-0.723493	0.0411267	0.103501	-0.343422	0.222428	-0.679388	-0.196513
671	TCGA-DJ-A13X-01A-21-A21L-20	TCGA-DJ-A13X	THCA	+	Primary	6.20821	-0.398718	-1.32953	0.391866	-0.00418987	0.0735406	-0.73252	0.578754	-0.00311918	-0.588627	-0.831895	-0.487305	-0.0500061	-0.31379	-0.200664	-0.53828	-0.163536
672	TCGA-J8-A3YF-01A-21-A301-20	TCGA-J8-A3YF	THCA	+	Primary	5.34859	-0.39198	2.66044	0.463716	1.08185	-0.381515	0.261517	-0.123017	1.23976	1.00087	0.88179	-0.451055	0.45904	-1.65364	0.0922223	0.565978	0.376906
673	TCGA-EL-A3ZG-01A-21-A301-20	TCGA-EL-A3ZG	THCA	+	Primary	5.55667	0.200494	2.10368	-2.48514	-3.43344	0.00431726	2.01199	-0.848561	-0.0173592	0.518161	0.747937	0.791067	-0.81734	-1.75809	-1.32209	-0.89537	0.0759046
674	TCGA-DJ-A1QI-01A-21-A21L-20	TCGA-DJ-A1QI	THCA	+	Primary	3.86403	-1.1465	2.54526	1.65614	1.36215	0.0944202	-0.226672	-0.456544	0.101218	-0.364776	-1.51369	0.407482	-0.503851	0.831921	-0.612962	-0.681676	0.244985
675	TCGA-EL-A3ZT-01A-21-A301-20	TCGA-EL-A3ZT	THCA	+	Primary	6.88511	-1.38594	1.36176	-1.07706	1.11764	-0.223139	-0.360664	-0.576658	1.65915	-1.10022	-0.37417	-0.796902	0.0917831	-0.898122	0.137134	-0.0428346	0.199197
676	TCGA-EL-A3GP-01A-21-A21L-20	TCGA-EL-A3GP	THCA	+	Primary	3.55836	-0.489794	2.89518	1.48156	1.34226	-0.891424	1.01947	-0.0166744	-0.269848	-0.102516	-0.372209	0.0505057	-0.40027	0.650536	-0.37623	-0.522286	-0.444797
677	TCGA-DJ-A3UK-01A-21-A301-20	TCGA-DJ-A3UK	THCA	+	Primary	5.95703	-0.860459	1.44336	-1.35648	-1.54576	0.305941	0.150318	-0.906852	-0.172883	-0.136166	0.51676	-0.213442	0.691142	-0.0880012	0.392905	0.495523	-0.263362
678	TCGA-ET-A39T-01A-21-A21N-20	TCGA-ET-A39T	THCA	+	Primary	3.38508	-1.1694	2.48486	3.3429	-0.68315	0.691912	-1.66105	-0.14725	0.329893	0.300153	0.0789049	1.3533	-0.387075	0.380543	-0.32897	1.08297	0.376326
679	TCGA-BJ-A4O9-01A-21-A302-20	TCGA-BJ-A4O9	THCA	+	Primary	3.69654	-0.52492	2.20295	1.22439	1.12554	0.55545	-0.312326	-0.0133968	-0.134471	1.30471	-0.470435	-0.0818487	-0.102873	0.430035	-0.370943	0.0961961	-0.392181
680	TCGA-FE-A232-01A-21-A21M-20	TCGA-FE-A232	THCA	+	Primary	5.94451	0.0410793	0.41036	-0.978234	-1.55309	1.13914	-0.906328	0.599895	0.86037	0.855365	-0.544054	-0.583108	-0.342652	-0.368529	0.625191	-0.638327	-1.37217
681	TCGA-DJ-A3VI-01A-21-A301-20	TCGA-DJ-A3VI	THCA	+	Primary	7.24766	-0.91459	-1.45843	-2.37423	-0.591476	0.340479	0.0821367	0.0657582	0.326255	0.030247	-0.997867	0.870821	0.28685	1.12007	-0.824904	0.737142	0.799313
682	TCGA-H2-A3RI-01A-21-A301-20	TCGA-H2-A3RI	THCA	+	Primary	3.60293	-0.194134	2.23188	2.23343	0.0645442	0.679024	-0.792651	-0.313807	-0.690682	0.0766324	-0.00841514	0.347954	-0.263613	0.438881	-0.503158	0.260456	-0.179008
683	TCGA-ET-A3DP-01A-21-A21N-20	TCGA-ET-A3DP	THCA	+	Primary	3.78801	-0.406925	0.244679	1.78324	-1.26286	-0.0837085	-0.234542	-0.147581	0.558906	0.742752	0.622246	0.124776	-0.239312	-0.479693	0.989747	-0.506843	0.332728
684	TCGA-DJ-A3V6-01A-21-A301-20	TCGA-DJ-A3V6	THCA	+	Primary	3.78178	-0.279945	3.50599	0.405245	1.6343	-1.50997	0.887005	-0.26867	-0.745012	-0.381128	0.350753	0.268097	-0.297483	1.23233	-0.298971	0.881326	-0.247792
685	TCGA-BJ-A0Z3-01A-21-A21L-20	TCGA-BJ-A0Z3	THCA	+	Primary	4.53072	-0.457172	2.24339	0.244596	1.50458	-1.04644	1.23402	0.295494	-0.201838	-0.0854676	-0.480101	0.249517	-0.313443	0.703022	-0.525516	-0.192574	-0.282295
686	TCGA-ET-A3DO-01A-21-A21L-20	TCGA-ET-A3DO	THCA	+	Primary	4.9589	-0.77746	1.47282	1.6503	-0.925172	1.46258	-0.909019	-0.320973	1.2058	0.590427	-1.32586	0.905463	-1.19468	0.178782	0.15755	0.425791	0.577314
687	TCGA-EM-A3O7-01A-21-A301-20	TCGA-EM-A3O7	THCA	+	Primary	5.37471	-0.824286	3.21249	0.856539	1.42572	-0.0898068	-0.211008	-0.097481	0.380578	-0.509546	-0.55309	0.301856	0.0902071	0.111052	-0.846607	1.36514	-0.926669
688	TCGA-EL-A3H5-01A-21-A21L-20	TCGA-EL-A3H5	THCA	+	Primary	3.82935	-0.43707	2.25103	0.37543	1.92319	-0.676569	1.84196	-0.0491047	-0.504857	-0.0683278	-0.3379	-0.168806	-0.408749	0.670808	0.00892778	-0.440045	-0.164096
689	TCGA-L6-A4EP-01A-21-A302-20	TCGA-L6-A4EP	THCA	+	Primary	3.76186	-0.371331	0.582527	2.16026	-1.47001	0.619711	0.780245	-0.211942	0.172608	-0.762998	-0.470542	0.782444	-0.136267	0.229461	0.0352598	0.559023	1.13256
690	TCGA-FE-A235-01A-21-A21M-20	TCGA-FE-A235	THCA	+	Primary	4.28373	0.122678	1.44236	1.2371	0.796696	-0.709958	0.511216	-0.147031	-0.541465	-0.39861	0.257281	0.0213225	-0.182352	0.0284547	-0.300041	0.305907	-0.58256
691	TCGA-DJ-A2PV-01A-21-A21M-20	TCGA-DJ-A2PV	THCA	+	Primary	3.88338	-0.580648	4.51764	-0.0785234	1.71739	-0.728929	1.13817	-0.413673	1.44964	0.238579	0.0892299	-0.57948	0.905144	-1.17017	0.321221	0.0520265	1.19252
692	TCGA-EL-A3H8-01A-21-A21L-20	TCGA-EL-A3H8	THCA	+	Primary	4.76832	-1.29174	0.851483	0.882837	-0.881371	0.108556	-0.480262	0.902604	1.4977	1.2795	-0.578323	-0.0212835	0.167723	-0.693897	0.291949	-0.776832	0.381807
693	TCGA-ET-A39J-01A-21-A21N-20	TCGA-ET-A39J	THCA	+	Primary	4.1782	-0.412583	3.37517	0.983175	0.849016	-0.485387	0.156001	-0.605844	0.499154	0.844912	0.977373	-0.834464	0.36814	-0.942795	0.386391	0.352082	0.351865
694	TCGA-EL-A3GR-01A-11-A21L-20	TCGA-EL-A3GR	THCA	+	Primary	2.91881	-0.113062	1.40263	2.24024	-1.20219	-0.493818	-0.481727	0.615737	0.267061	0.237184	0.37876	0.297128	0.768259	0.522935	0.834997	0.0775872	0.605896
695	TCGA-DJ-A3V2-01A-21-A301-20	TCGA-DJ-A3V2	THCA	+	Primary	6.50811	-0.867077	0.780646	-0.763546	0.672642	-0.485656	0.10179	0.183384	-0.228853	-1.0127	-0.262422	0.232449	-0.0605733	0.0389196	0.390796	0.384246	-0.0516466
696	TCGA-DJ-A2PW-01A-21-A21M-20	TCGA-DJ-A2PW	THCA	+	Primary	5.11904	-0.18245	1.6811	-0.859039	0.396329	0.228144	1.24956	-0.921471	-0.286982	-0.361443	0.254079	0.110077	0.205947	0.676983	-0.0515454	0.489877	0.0619206
697	TCGA-E3-A3DY-01A-21-A21N-20	TCGA-E3-A3DY	THCA	+	Primary	4.00902	0.738833	0.943809	2.33972	-0.767486	0.593203	-1.4833	-0.404406	-0.222557	0.252565	0.589476	-0.387957	-0.679564	-0.294882	0.260046	0.309467	-0.245014
698	TCGA-J8-A3YH-01A-21-A302-20	TCGA-J8-A3YH	THCA	+	Primary	6.88076	-1.83024	-0.421114	-0.442639	-1.86383	0.189435	-0.252819	0.171889	0.968401	-0.35378	0.00234644	-0.572375	0.814837	-0.272023	-0.214334	-0.16593	-0.157852
699	TCGA-FY-A3TY-01A-21-A301-20	TCGA-FY-A3TY	THCA	+	Primary	4.65462	-0.628385	2.71079	0.716187	1.06696	0.306289	0.525055	-0.639018	0.865374	-0.425315	0.703622	-0.625005	0.786891	-0.591079	0.506853	0.516294	1.01904
700	TCGA-E3-A3E3-01A-21-A21N-20	TCGA-E3-A3E3	THCA	+	Primary	5.23979	-0.304981	2.46668	0.0242277	0.376514	1.3922	-1.0892	-0.163759	1.85396	1.60569	0.199048	-0.364032	-0.473867	-0.629692	0.413311	0.374856	-0.637845
701	TCGA-L6-A4EU-01A-21-A302-20	TCGA-L6-A4EU	THCA	+	Primary	6.56264	-2.10853	-0.127995	0.938167	0.863221	1.66677	-1.95033	-0.253145	1.24261	-1.73393	0.213788	-1.23693	-0.0922362	0.673979	-0.83176	-0.199785	-0.375713
702	TCGA-DJ-A2PR-01A-21-A21M-20	TCGA-DJ-A2PR	THCA	+	Primary	4.95596	-1.08427	1.05566	0.207433	1.35047	-0.5831	0.897687	0.639825	0.10054	-0.463845	-0.509494	-0.0976302	0.491863	0.767752	-0.957863	0.03867	-0.2944
703	TCGA-FE-A236-01A-21-A21M-20	TCGA-FE-A236	THCA	+	Primary	4.28791	-0.025465	1.70844	1.05227	1.43163	0.461307	-0.338979	-0.470468	-0.688745	-0.449123	-0.558402	0.641368	-1.03385	0.434755	0.205845	-0.482289	0.749525
704	TCGA-BJ-A2NA-01A-21-A21L-20	TCGA-BJ-A2NA	THCA	+	Primary	7.58518	-1.06319	-2.14847	-2.2979	-1.34751	0.201143	0.747733	-0.00410283	0.520124	-0.96167	-0.652578	-0.742926	0.331052	-0.299814	0.27333	-0.492288	-0.0415775
705	TCGA-ET-A3BS-01A-21-A21N-20	TCGA-ET-A3BS	THCA	+	Primary	4.90091	-1.27973	0.905194	0.949477	0.15853	1.15577	-0.630931	0.051401	0.662862	0.788412	-0.485444	0.124077	0.21861	1.01519	-0.540284	0.403816	-0.00807549
706	TCGA-ET-A3DT-01A-21-A21N-20	TCGA-ET-A3DT	THCA	+	Primary	3.86993	-0.0997563	3.4693	0.852347	0.938718	-0.237155	0.286368	-0.249961	0.47006	0.0596439	0.416572	-0.057441	0.653249	-0.772894	0.861521	0.499416	0.772697
707	TCGA-ET-A3BW-01A-21-A21N-20	TCGA-ET-A3BW	THCA	+	Primary	3.02131	0.184865	1.73541	1.5248	0.894145	-1.18564	0.666495	1.02276	-0.207218	0.182935	-0.693331	0.602978	0.0718261	0.162624	-0.195999	-0.643459	-0.0495967
708	TCGA-DJ-A2PY-01A-21-A21M-20	TCGA-DJ-A2PY	THCA	+	Primary	6.07059	-0.939522	-0.42838	-0.756054	-1.72012	-0.363289	0.166398	0.271149	0.334819	-0.287993	-0.490888	-0.355787	0.708633	0.0446638	0.533366	-0.611411	-0.382827
709	TCGA-EM-A3FO-01A-21-A21L-20	TCGA-EM-A3FO	THCA	+	Primary	6.21355	-0.883862	0.542827	-1.01946	-1.60576	0.406929	-0.198309	-0.0844717	0.692886	-0.470035	-0.0691975	0.053299	0.579658	-0.471959	0.465648	0.344003	-0.709822
710	TCGA-FE-A230-01A-21-A21M-20	TCGA-FE-A230	THCA	+	Primary	2.65966	0.632399	1.47067	1.80704	-0.386085	0.546941	-1.83566	-0.0115101	0.159138	0.3906	0.280791	0.672867	-0.359117	1.42786	0.312732	-0.815399	0.458902
711	TCGA-ET-A3BP-01A-11-A21N-20	TCGA-ET-A3BP	THCA	+	Primary	5.90938	-1.14734	0.627483	0.860623	-0.0882146	0.227941	-0.551808	0.568234	0.258382	-0.361595	-1.30157	0.445494	0.285191	0.774439	-0.704577	0.425562	-0.325672
712	TCGA-ET-A3BU-01A-21-A21N-20	TCGA-ET-A3BU	THCA	+	Primary	6.38992	-1.09338	-0.790562	-1.89918	-0.724832	0.915357	0.926362	-0.885248	-0.451277	-0.52683	-1.18332	0.303378	0.402196	0.74802	-0.685433	0.074861	0.214316
713	TCGA-EM-A2CS-01A-21-A21M-20	TCGA-EM-A2CS	THCA	+	Primary	3.80265	-0.588791	2.74939	1.19814	1.29042	-0.0387407	0.346684	-0.309646	0.263464	0.501821	0.178139	-0.611793	0.239491	-0.760467	0.156264	-0.170585	0.748569
714	TCGA-E8-A418-01A-21-A301-20	TCGA-E8-A418	THCA	+	Primary	7.62417	-1.3698	-0.36004	-0.962421	-0.0311523	1.04123	-0.0780196	-0.825652	0.270137	-1.0101	-1.70912	0.953361	-0.219999	0.550646	-0.811527	0.5787	-0.0238163
715	TCGA-EL-A4JZ-01A-21-A302-20	TCGA-EL-A4JZ	THCA	+	Primary	4.13765	-0.634559	2.57897	1.87097	0.662477	-0.284603	-0.878519	-0.147242	0.057526	-0.331806	0.954551	0.49012	0.436617	0.443605	-0.970525	1.42055	-0.3361
716	TCGA-EL-A4KH-01A-41-A302-20	TCGA-EL-A4KH	THCA	+	Primary	6.54016	-1.0578	2.04763	-0.82145	0.567274	0.210512	-0.808106	-0.97852	1.36267	-1.02661	1.06509	-1.49526	0.30759	-0.855251	-0.178237	0.395913	-0.141813
717	TCGA-IM-A3EB-01A-21-A21L-20	TCGA-IM-A3EB	THCA	+	Primary	3.97177	-1.21385	2.97544	1.37864	-1.05698	0.723471	1.22225	-0.617038	0.167825	-1.32927	-1.50218	0.762069	-0.316599	0.17176	0.0127748	0.120977	-0.318789
718	TCGA-DJ-A2PU-01A-41-A21N-20	TCGA-DJ-A2PU	THCA	+	Primary	3.53484	-0.0287892	2.42205	1.98936	0.610192	0.119572	0.169342	0.00619393	0.771146	0.441778	0.19325	-0.477339	0.169984	-1.08941	0.190178	-0.463128	0.532046
719	TCGA-ET-A3BV-01A-21-A21N-20	TCGA-ET-A3BV	THCA	+	Primary	4.47624	-0.559963	1.8833	1.13727	-0.0826992	-0.714429	1.24492	0.428094	0.626405	-0.295944	-0.0963136	-0.049416	1.01153	-0.775074	0.00644047	0.202736	0.909862
720	TCGA-EL-A3GV-01A-21-A21L-20	TCGA-EL-A3GV	THCA	+	Primary	4.68641	-1.10693	1.26474	0.74629	1.57252	-0.228979	0.538776	-0.467575	-0.495666	-0.39394	-0.55639	-0.190394	-0.179508	0.76898	-0.275978	-0.428126	-0.288746
721	TCGA-DJ-A4UW-01A-21-A302-20	TCGA-DJ-A4UW	THCA	+	Primary	7.41209	-1.44139	-1.6273	-1.86257	-0.0904667	1.3102	0.721937	-0.489353	-0.0285284	-0.626221	-1.4249	0.0476339	0.268647	0.947576	0.162519	0.468548	0.59546
722	TCGA-E8-A436-01A-21-A302-20	TCGA-E8-A436	THCA	+	Primary	3.97557	-1.00992	2.68172	1.10342	1.5338	0.322878	1.01198	-0.457792	0.94511	-0.247477	0.069381	-0.536758	0.430582	-0.687875	0.187136	0.0510456	1.0255
723	TCGA-E8-A3X7-01A-21-A301-20	TCGA-E8-A3X7	THCA	+	Primary	3.54374	0.150089	0.736145	2.17003	-0.947101	0.286448	-1.44416	0.56445	-0.268974	1.43771	-0.642705	1.0475	0.417786	0.172918	-0.266946	-0.0674734	0.0094919
724	TCGA-ET-A39M-01A-21-A21N-20	TCGA-ET-A39M	THCA	+	Primary	6.03959	-1.54769	-0.665761	0.0305749	-0.781693	0.848885	-2.13195	0.85205	1.09321	0.919387	-0.851587	0.311051	-0.0848973	0.673899	-0.991606	0.0907649	-0.22817
725	TCGA-EL-A3CL-01A-21-A21N-20	TCGA-EL-A3CL	THCA	+	Primary	2.62862	-0.898312	1.35027	2.41599	0.882815	0.762714	-0.755609	-0.764171	-0.196224	0.160492	0.287523	-0.277016	-0.328562	0.83726	-0.00143416	-0.0981122	0.153477

## Sheet: G
* Threshold values for Giα are 0.1 and -0.1 (see Methods), i.e., a protein, i, is considered to particiapte in process α if Giα≥0.1 or Giα≤-0.1. Values exceeding threshold values are highlighted.
	Gi1	Gi2	Gi3	Gi4	Gi5	Gi6	Gi7	Gi8	Gi9	Gi10	Gi11	Gi12	Gi13	Gi14	Gi15	Gi16	Gi17
X1433EPSILON	0.0312302	-0.00918436	0.0436857	-0.00654393	0.0733672	-0.0253526	0.0466086	-0.00835858	0.0216919	-0.00396436	0.0150061	-0.0243769	0.0211233	-0.00824549	0.00173979	-0.0123052	0.00748475
X4EBP1	-0.0824996	0.0819743	0.0194565	-0.0522455	0.0796596	0.0156345	0.0627469	-0.021041	0.0399958	-0.072473	-0.0518841	0.0244013	0.0250939	0.0351206	-0.0865207	-0.0889722	-0.0344789
X4EBP1_pS65	-0.0454254	0.0327222	-0.0202305	-0.030936	0.0069999	-0.0321497	-0.014721	-0.0174811	0.029939	-0.0195256	-0.0271874	0.000983275	0.037184	-0.0141654	-0.0668139	-0.0333041	-0.035755
X4EBP1_pT37T46	-0.0817434	0.0129304	-0.0734718	0.0431835	-0.166468	-0.16875	-0.0769289	0.0293718	0.0473113	0.0127691	-0.0295935	0.11096	0.0498211	-0.0289477	-0.0844416	-0.0941091	-0.0337617
X53BP1	-0.0991708	-0.00712227	-0.150221	0.0844477	-0.0264426	0.114231	-0.0288448	0.0662701	0.00903368	-0.026253	0.0139149	0.0804342	-0.0404553	-0.00622403	0.024503	-0.064626	0.0103523
ACC_pS79	-0.111127	-0.0125498	-0.0222983	0.000253291	0.0577077	-0.0822002	0.0931312	0.0485299	0.0162213	-0.0324942	0.0336716	0.00342079	0.0415281	-0.00174368	0.0405547	0.0345657	-0.0906833
ACC1	-0.222192	-0.0334028	-0.0305484	-0.0613291	0.0156451	-0.0392349	0.00760408	0.0189486	-0.0115734	-0.0643102	0.0925164	-0.0229364	0.0789408	0.0697858	0.0540035	0.0805796	-0.126664
AKT	-0.0309966	0.154189	-0.108073	0.0719673	-0.0625658	0.0457707	-0.0468841	-0.00100244	0.093869	-0.0706504	-0.0574926	-0.0677002	0.0490774	0.0276378	0.113784	-0.0128217	0.0339056
AKT_pS473	-0.00807895	0.0203665	-0.0742422	0.00994191	-0.097155	-0.24722	0.163533	0.105419	0.0581565	-0.0130421	-0.0643025	-0.0241176	-0.185572	-0.0204948	-0.0805777	0.12643	-0.0473247
AKT_pT308	-0.01213	0.0304697	-0.0704163	-0.0175599	-0.0773755	-0.247694	0.0879458	0.0929549	0.0589196	0.00250454	-0.0730681	-0.00386192	-0.247941	-0.0227819	-0.0970155	0.128893	-0.0448929
AMPKALPHA	0.00100934	-0.00149596	-0.0148369	0.0498844	-0.0221663	-0.0139173	-0.0249462	0.00488235	-0.0272374	0.0091095	0.0860207	0.0130314	-0.0342993	-0.00932158	0.0178656	0.0106053	0.0277928
AMPKALPHA_pT172	0.0229117	-0.0102095	-0.0006764	0.089499	0.0432576	0.0986316	0.0397971	0.05164	-0.0488796	-0.023341	0.0283435	-0.0872727	0.00867785	0.0585085	0.103302	0.0684756	0.00232787
AR	-0.0299443	-0.112042	-0.0511602	-0.0604668	-0.00162583	0.0167951	0.0103681	0.0341968	-0.0141328	0.0265653	0.000631539	0.0503703	-0.0228652	-0.00323774	0.0279087	0.0361078	-0.0121557
ASNS	-0.0598403	-0.0404795	0.0915285	-0.0911549	0.0656319	-0.0122634	0.0259798	0.0851334	-0.0927319	-0.0128299	-0.0177672	0.0246124	-0.0403522	-0.0375088	0.0718111	-0.00966046	-0.112327
ATM	-0.00602773	0.100265	-0.017317	0.0950293	-0.00793812	0.00716655	-0.0185869	-0.0199079	-0.0820865	-0.0665945	-0.0793116	-0.0689075	0.0814616	0.0555802	0.133281	0.162019	-0.0743497
BAK	-0.0204576	0.018072	-0.0142157	-0.0666624	0.0348872	0.0846116	0.0319653	-0.0345828	0.0792754	0.0770214	-0.00886843	-0.076088	0.0185819	-0.058023	-0.104665	0.0469438	0.165548
BAX	-0.0151596	0.0504314	0.0477259	0.0339876	-0.0167743	-0.00580344	-0.0774813	-0.034007	-0.023272	-0.00354899	0.0389053	0.00097226	-0.0736154	-0.0244638	-0.0558943	-0.00201933	-0.00747624
BCL2	0.121235	0.0473685	-0.0640946	0.0971587	0.00910701	0.0681554	0.0721889	-0.162771	-0.0485271	0.0825484	0.0273782	0.0406207	-0.0201713	0.140522	0.0122581	-0.0710044	0.022773
BCLXL	0.0108502	0.0259712	0.0472236	0.0226798	-0.00524332	0.0123475	-0.00321026	-0.0490112	0.0261596	0.00161777	0.0304427	-0.0263736	-0.0434891	-0.0417186	-0.0628667	-0.0443754	0.0314811
BECLIN	0.0119345	0.0206231	0.0250888	-0.016826	-0.000772904	-0.0159305	0.0199352	-0.0128737	0.0102622	0.00908793	-0.0112064	-0.0373998	0.0353928	0.0176451	0.00597897	-0.0174837	0.0049608
BETACATENIN	0.0473797	-0.0816832	-0.0921479	0.293212	0.0377859	-0.0105356	0.0489762	-0.14745	0.0851304	0.0152261	0.0796443	-0.0159872	-0.113439	-0.0116477	0.102822	0.127941	-0.042228
BID	0.0198808	0.00727885	0.0258649	-0.0322047	-0.0472847	0.0290319	-0.0487197	0.00443379	0.0343524	0.070671	-0.00921888	-0.00209769	-0.0415415	-0.0214192	-0.0124688	0.0234284	-0.068909
BIM	-0.0519241	-0.0673224	-0.0561513	-0.0368569	0.0205931	0.0901039	0.00726476	-0.0225896	-0.0830153	0.0609132	-0.0492001	-0.0472023	-0.0638598	0.0418821	0.0411486	-0.00457026	0.0554498
CJUN_pS73	0.0153567	-0.021255	0.0120972	0.00123	0.00190214	-0.012015	0.0231065	0.0306401	0.0194458	0.0208672	-0.0255173	0.0286839	0.0391833	-0.011397	0.0244197	-0.0279345	-0.0078077
CKIT	0.084124	0.117844	-0.115471	-0.00266363	-0.0482997	-0.0804122	-0.00232004	-0.376535	0.135421	0.0660438	-0.163457	0.0187506	0.0253301	0.314338	0.224821	-0.236629	-0.0987602
CMET_pY1235	0.00481124	-0.000672687	-0.0016333	-0.0276739	0.00522607	0.0146585	-0.0177998	0.00169052	0.0293477	0.022359	0.0142639	-0.0164688	0.0254427	-0.00105437	-0.023852	0.0136172	-0.00641866
CMYC	-0.037296	0.0168253	0.033172	-0.103617	-0.0495236	0.00498742	-0.0414323	-0.0247507	0.0949413	0.0575149	-0.0232576	0.00854958	0.0146604	0.0350845	0.0453621	-0.0157835	-0.0782384
CRAF	0.000769538	0.00873907	-0.0352849	0.0130949	-0.0010258	0.0437254	-0.0241722	0.0152588	-0.00787855	0.0114774	-0.0118884	-0.0121158	0.0100156	-0.015071	0.022659	0.04636	-0.0227241
CRAF_pS338	0.0428713	-0.00981357	0.00532885	-0.0331435	0.00736691	-0.015325	0.00147479	0.0140176	0.0359515	0.0338538	0.000191668	-0.00288437	0.0191144	-0.0431507	0.0240859	0.0269962	0.0285467
CASPASE7CLEAVEDD198	-0.0445472	0.107037	0.081458	-0.0961877	0.0121616	0.0387562	-0.0729027	-0.0086053	-0.321857	0.0288091	-0.254342	-0.31733	-0.0524247	-0.0553657	-0.231311	0.140624	0.0901464
CAVEOLIN1	0.0509647	0.0166995	0.0463062	-0.002987	-0.332171	0.0798034	-0.0283218	-0.00431761	0.0719364	-0.0602001	0.2655	-0.292159	-0.00247883	0.116977	-0.0316236	0.00548461	-0.066478
CD31	0.0490224	-0.00359973	0.0484733	-0.0060219	0.0216224	-0.0178487	0.00679485	0.000198326	-0.0293856	0.0308761	0.00352429	-0.049107	0.0302111	-0.0162875	0.0358493	-0.0134151	-0.013035
CD49B	0.0223607	-0.0292461	0.0625426	-0.00287935	0.051006	-0.0275472	0.0259343	0.0521336	-0.0196137	-0.042898	0.0492983	0.0320475	-0.110538	0.0526975	0.00995239	0.000275606	0.0431954
CDK1	0.0310603	0.00235576	-0.0169778	-0.0484371	0.0142546	-0.0395012	-0.0316359	-0.0167044	0.0621652	-0.0136883	0.0264454	-0.0598623	0.0919811	-0.0256586	-0.0470502	-0.0340878	-0.073508
CHK1	0.0352538	0.0125095	0.0188614	-0.025471	0.0191143	-0.0128133	-0.0110944	0.00632789	0.00850656	0.000864901	-0.0193139	0.0215919	0.00747035	0.0134658	0.00669129	-0.0249427	-0.0575307
CHK1_pS345	0.00671006	0.0121861	-0.00757647	0.0294702	0.0179859	-0.000687895	0.0231076	-0.00247869	0.00171257	0.00579786	-0.00274004	-0.0174477	-0.00400335	-0.0500306	-0.00943387	-0.0209654	-0.00184596
CHK2	-0.0693366	-0.0049198	0.0294433	0.00681494	0.0528639	-0.00306173	-0.00352633	-0.0329504	-0.00996537	-0.0643025	0.0147611	0.0221818	-0.00195454	-0.0187646	-0.0227343	-0.0312314	-0.00866177
CHK2_pT68	0.0293526	-0.00644125	0.0409656	-0.0404777	0.0492647	-0.0180794	0.0164856	0.0105699	0.0377723	0.0400729	-0.0132859	0.00375291	0.0212371	-0.00487794	-0.0149013	0.00491983	-0.0241914
CIAP	-0.00416767	0.00976775	0.00618098	0.0147718	0.0308533	-0.00337238	0.0130564	0.00080485	0.000325369	-0.0304843	0.0421969	0.0101283	0.028845	0.0514526	0.0121505	0.026511	0.0173524
CLAUDIN7	0.202545	-0.288075	-0.275033	-0.0916711	0.0604019	0.0497436	-0.0540081	0.0181146	0.011752	-0.285738	-0.284828	0.0468164	-0.185192	0.0242386	0.0563569	-0.228225	0.198345
COLLAGENVI	0.0472261	0.0118307	0.000571554	-0.109371	-0.120734	-0.000883132	-0.0367792	-0.0429527	0.0558405	0.0764311	-0.00405306	-0.0164616	-0.000859606	0.126134	0.0678357	0.0406918	-0.0112009
CYCLINB1	-0.210935	-0.0116199	-0.0713719	-0.151889	0.100704	0.023192	-0.0361943	-0.0331131	0.0158968	-0.151773	-0.0488797	0.00902551	0.102625	-0.0882745	-0.0681449	-0.000651353	-0.0788207
CYCLIND1	0.0361602	0.00763112	0.00109723	-0.0290317	-0.0115083	0.00775284	-0.0158226	-0.026541	0.0259147	0.017779	-0.0174479	0.021394	-0.0572704	-0.00139843	-0.0477254	0.00458709	-0.0415885
CYCLINE1	-0.068371	-0.0188898	0.00224926	-0.0269698	0.0849027	-0.0560573	0.0117716	-0.0349232	-0.0299155	-0.0423896	0.00456971	0.0416998	-0.00677257	-0.0191538	-0.00667712	-0.0174724	-0.062906
DJ1	0.0162521	0.0178337	-0.00921067	0.0217527	-0.0153506	-0.0123948	-0.0306454	-0.0217452	-0.0193245	0.00928973	0.0923015	-0.000752665	-0.00608397	0.0301019	-0.0128281	-0.0176493	0.0620401
DVL3	-0.0329964	-0.0142832	-0.011441	0.0478904	0.0126	0.064905	0.0232119	0.0483654	0.0268154	-0.00293356	-0.041228	0.033692	-0.0459698	-0.00657332	0.0138425	-0.0396096	-0.0222358
ECADHERIN	0.0229805	-0.281552	-0.121118	0.255844	0.088677	-0.230494	0.0362775	-0.449072	0.079297	0.151528	-0.073538	-0.209145	-0.0958394	-0.0450699	0.0121748	0.282094	0.0128313
EEF2	-0.0762677	0.102948	0.0133926	0.0452546	-0.00960019	0.0369312	-0.0476038	-0.0973476	-0.00125642	-0.118215	0.0927796	-0.0293593	-0.0943046	-0.0664937	-0.0782696	-0.129677	-0.0582244
EEF2K	-0.0583684	0.028832	-0.0561845	0.0467285	0.0187036	0.0816497	0.062245	0.00562022	0.0469287	0.0125638	-0.0501776	-0.00748546	0.0174712	-0.0471278	-0.00792106	-0.0627439	-0.0156213
EGFR	0.00889219	-0.0304847	0.0250006	0.0360176	-0.0575983	0.0333246	-0.055134	0.00646051	0.0238951	0.029212	-0.0198325	0.0147115	-0.0229276	8.04801e-05	0.0226448	-0.0430066	-0.0373046
EGFR_pY1068	0.0515699	-0.0653193	0.0139265	-0.00820869	0.0462331	-0.0582361	0.0795104	0.0616873	0.0137012	0.0113725	-0.0395798	-0.00789386	0.0458802	-0.00477131	0.0598994	-0.0537711	0.0474792
EGFR_pY1173	0.0361121	-0.00216823	-0.0139192	-0.01809	-0.0298417	0.035469	-0.0445922	-0.00136023	0.0731119	0.0669211	0.0360485	-0.0153598	-0.0191006	-0.0909201	0.0367976	-0.00556915	-0.0164685
EIF4E	-0.0818654	0.00579332	-0.030886	-0.0610371	-0.0248037	0.0382095	0.00423903	-0.00664548	0.0127949	-0.0189545	-0.0818748	0.0077558	-0.00107249	0.0203138	-0.0238462	-0.138834	0.0343088
ERALPHA	-0.121893	-0.237417	-0.0328727	-0.0751528	-0.0256483	0.0262983	0.00107051	0.0720239	-0.0303311	0.0506225	-0.0166158	0.0257806	-0.0607041	-0.0346375	-0.00111764	0.0173188	0.057546
ERALPHA_pS118	-0.0469739	-0.0515166	-0.0384689	0.00347403	0.0307254	0.0308445	-0.00345871	-0.000411781	0.00676636	0.0234032	0.0400725	0.0240868	-0.0178813	-0.0234009	-0.02606	0.0213981	0.0196269
ERK2	0.020801	0.036043	-0.00321332	0.101946	-0.0335065	0.0106463	-0.0703857	-0.0337365	-0.00691234	-0.0506628	0.0612697	-0.0410355	-0.00955394	-0.0385801	0.0161627	-0.034954	-0.0499568
FIBRONECTIN	0.156792	-0.0256347	0.366151	0.198769	-0.0642389	0.0418904	-0.133283	-0.00447835	0.207405	-0.237594	-0.311613	0.283895	-0.114504	-0.147158	-0.100337	0.166932	-0.125546
FOXO3A	0.00683548	-0.0292039	0.0273648	-0.0145179	0.0324678	-0.00105047	0.0441199	0.0197623	-0.00835181	0.0277249	-0.0248045	0.0155683	-0.012113	0.0394723	-0.0208483	-0.00406089	-0.0297324
GAB2	-0.0593889	0.116732	-0.0588392	0.0435541	-0.0110644	0.10966	0.0435146	-0.0177658	0.141935	0.0026803	-0.12321	-0.0234686	0.0601069	0.0314633	0.0100193	-0.0672251	-0.0458223
GATA3	0.00771845	-0.032034	0.0239486	-0.011423	0.020399	0.0241013	0.0516756	-0.0338249	0.00512185	-0.0159887	0.00926326	-0.034796	-0.0398445	-0.0840114	-0.0326877	-0.0438237	0.0738399
GSK3ALPHABETA	-0.0320238	0.0157859	-0.00494376	0.0379366	0.00383761	-0.00766011	-0.00952862	-0.0177063	-0.0203941	-0.0531097	0.0434084	0.0371359	-0.0240016	0.0467636	0.0189988	0.0386288	-0.030553
GSK3ALPHABETA_pS21S9	-0.106415	0.0334117	-0.167121	0.051317	-0.146598	-0.161199	0.00747396	0.0969407	0.0181749	0.00302643	-0.0691279	0.0124606	-0.0572953	-0.0523551	-0.0192216	-0.0368875	0.0486291
HER2	-0.052162	-0.118898	-0.112839	0.0750695	-0.0584263	0.0851341	-0.0340146	0.0727206	0.0890714	0.0380486	0.0212308	0.0343412	-0.0842458	-0.0787398	0.0683358	-0.0494126	0.0500458
HER2_pY1248	0.0324236	-0.0606437	-0.0626143	-0.0382273	-0.0251672	-0.00268909	-0.0147151	0.0533633	0.0139374	0.0223924	-0.0247433	0.027797	-0.00605606	-0.0240953	0.0593464	0.0199427	0.0284297
HER3	-0.00446189	0.124746	0.0201038	0.0287136	0.0652947	0.0627817	0.0838719	-0.0118022	0.243809	0.00689473	-0.00437071	-0.115822	0.10618	-0.108363	-0.0344283	0.0485027	0.168875
HER3_pY1289	0.0258293	0.0059822	0.000260606	-0.0222713	0.00746809	0.0133019	-0.00833282	0.000384886	0.0114724	0.0189132	-0.00299787	0.00665091	-0.00830712	0.00759109	-0.00870906	0.0286984	-0.0286334
HSP70	0.0846222	0.0108909	0.118868	-0.0701703	-0.16619	0.0768561	-0.142353	0.031716	0.114455	0.265619	-0.112844	-0.0269902	-0.148442	-0.143112	0.124672	0.0828223	-0.300166
IGFBP2	-0.133428	-0.0553771	0.00293867	-0.107271	-0.0140014	0.0816001	0.0419412	0.246768	0.175234	-0.0681065	0.0166399	-0.0457269	-0.263794	0.0178189	0.0271663	0.0843719	-0.0110639
INPP4B	-0.0123869	-0.101656	0.019798	-0.0370552	0.0641508	-0.0101593	0.0613328	0.0258713	-0.00311805	-0.0441005	-0.03226	-0.00626205	0.0110869	-0.0180543	-0.00407333	-0.0374779	-0.00427208
IRS1	0.044677	-0.0227302	-0.0324462	-0.0450492	0.0392811	0.0379896	0.0101336	0.0269739	0.0359562	0.0230234	-0.016229	0.0247974	0.0153774	-0.0136055	0.0311634	-0.0119893	0.0495626
JNK_pT183Y185	0.0647359	-0.0354627	0.0204451	-0.00578826	0.00861748	-0.0392787	0.00716531	0.0421862	-0.000854654	0.0249098	-0.0163065	0.0384668	0.0226312	0.00365165	-0.00232805	-0.00538423	-0.0386856
JNK2	0.0429946	-0.0220092	-0.0445856	0.037994	0.0100798	0.0592791	0.0236345	0.0178808	-0.022402	-0.0351661	0.0292857	-0.0400059	-0.0415678	-0.00952915	-0.0309752	-0.058863	-0.0550308
KU80	-0.0701931	0.0164191	-0.0738988	0.0667939	-0.0135219	0.0851987	-0.0532253	-0.0215609	0.027609	-0.0575185	0.0101005	0.0450413	-0.00558116	0.0114433	0.0713473	0.0148815	-0.0437537
LCK	0.00786495	0.0490354	0.0476587	-0.03091	-0.0683064	0.0749444	-0.0390355	0.00186447	-0.168802	0.0417231	-0.146465	-0.190997	-0.0330621	-0.063809	-0.0722704	-0.0370308	0.00420857
LKB1	0.1026	-0.01342	-0.0467486	-0.0577419	0.028705	-0.00866634	-0.0296113	0.0150465	-0.0186495	-0.0348687	-0.00170624	0.0120579	-0.0574664	0.0323314	-0.0179296	0.0219895	-0.0557971
MAPK_pT202Y204	0.0423169	0.0115536	-0.0206346	-0.0546461	-0.124672	-0.170368	0.0805891	0.0566317	-0.00316414	0.0222385	-0.0174912	0.0706166	0.125482	-0.0623697	-0.0807224	-0.0129642	0.0772721
MEK1	-0.0227645	0.0379686	0.0103577	-0.0573964	0.000873886	0.0390667	0.123114	0.0164955	0.0151514	-0.0242917	-0.0963894	-0.0402609	-0.00218762	0.0226696	-0.0365809	-0.178685	-0.0445983
MEK1_pS217S221	0.040986	0.054886	0.0461984	-0.023166	-0.0415716	-0.0853594	0.00275704	0.0343606	0.033052	0.00366438	0.00906822	0.00871348	0.0406038	-0.0234721	-0.0775795	-0.0282916	0.0243536
MIG6	0.0439622	0.0130445	0.0155638	-0.0194685	0.0169937	0.0096747	-0.0378127	-0.00915947	0.0120022	-0.0171056	-0.00773213	0.0335672	-0.0475035	0.0127311	0.0416656	0.0118459	0.0307297
MRE11	0.0360335	-0.00897237	0.0275233	-0.0320955	0.0112963	0.00541884	-0.00273379	0.011705	0.0341295	0.0422946	-0.00701528	-0.013915	0.0230084	-0.0232223	0.0160594	0.0319093	0.00487659
MTOR	-0.0200525	0.0419881	-0.0596466	0.0883295	0.00664104	0.0225817	0.00446722	0.00151107	-0.00497503	-0.0268171	-0.013642	-0.0132883	0.00500245	0.0252202	0.0706535	0.0305356	-0.0432509
MTOR_pS2448	0.0109915	0.0320219	-0.018712	0.0350648	-0.0256751	-0.0628111	0.0449322	0.012518	-0.00546093	-0.00897659	-0.00266441	-0.0178405	0.00715166	-0.0078667	0.0263628	-0.00974872	-0.0151401
NCADHERIN	0.0795684	0.0229207	0.0372289	-0.00733268	-0.00753141	0.0342276	-0.0157515	0.0125957	0.025659	0.0796929	0.0238206	0.0203942	-0.0773572	-0.0155519	-0.0350641	0.0189575	-0.0948624
NFKBP65_pS536	-0.0417222	0.0344351	-0.0644448	0.0465498	-0.0544724	-0.00149397	0.0512576	0.0938339	0.0252817	0.0770965	-0.260315	-0.0861405	0.0158646	-0.080148	0.00468884	-0.110626	0.124409
NF2	-0.0273213	0.0502711	-0.00956906	0.0707059	-0.0194649	0.0332109	-0.0218098	-0.0684788	-0.0277844	-0.0486628	0.0758163	0.00371408	-0.0944341	-0.0641641	-0.0619911	0.002887	-0.0308603
NOTCH1	0.0131306	0.0180263	0.00779118	-0.0150755	0.0358318	0.0323406	0.054611	0.0447009	0.048159	0.0313233	-0.0442725	-0.012237	0.00861094	0.0206032	0.0288543	-0.00492613	-0.0463098
PCADHERIN	0.0185836	-0.0121575	0.00379301	-0.00829851	0.0238339	-0.00162464	-0.0109746	0.00499231	0.0149961	0.00251709	0.0485068	-0.0180015	0.0223243	-0.00370461	0.0382173	0.00982049	0.0361728
P27	0.0235218	-0.0173413	-0.0148438	-0.0312105	0.0260875	0.0297487	0.0528326	0.0124361	-0.057008	0.0167575	-0.0200168	-0.0258558	-0.0107341	0.0543072	-0.0736671	-0.00388055	0.0187475
P27_pT157	0.0250367	0.00804291	-0.0119973	-0.0243957	0.00878268	0.0102032	0.00579318	0.00600936	0.0231031	0.00959337	-0.00247066	-0.00558057	0.00938751	-0.0264	0.00224996	-0.00652666	0.00133329
P38MAPK	0.0444636	0.0244634	0.0333066	0.0736256	-0.00485991	-0.0119569	-0.040185	-0.0167316	-0.0806391	-0.01817	0.00541737	0.0112657	0.0320008	0.0378878	0.0101163	-0.00439081	-0.00696569
P38_pT180Y182	0.053536	-0.0155509	-0.0265361	0.122395	-0.142996	-0.106842	-0.0991569	0.0849394	-0.130669	0.0381923	0.0334565	0.059927	0.0198299	-0.0231607	-0.00742243	-0.0338977	0.0430657
P53	0.0208245	-0.0170012	0.0173824	-0.048644	0.053154	-0.0168873	0.0224346	0.0311143	0.0274231	0.010502	-0.0234551	-0.0338793	0.0366457	-0.0290973	0.055489	-0.0267141	-0.00240822
P70S6K1	-0.0503956	0.03066	-0.0123597	0.0274809	0.0135269	0.0236584	0.0333182	0.0162946	-0.0216424	-0.0198064	-0.00409426	-0.000826026	0.00130624	-0.010206	0.016964	-0.00993088	-0.00648991
P70S6K_pT389	0.0472956	-0.0119402	0.0756333	-0.0229937	0.0393509	-0.055788	0.104879	0.028239	-0.00772653	0.0215221	-0.0262931	0.00213058	0.0277457	-0.0325812	0.017625	-0.0305862	-0.0440597
P90RSK_pT359S363	0.0298903	-0.0168744	-0.0204396	-0.0147986	0.00541547	-0.0468424	0.00314895	0.0468572	-0.0303687	0.0378784	-0.0220714	0.0688173	-0.0117435	-0.00882179	0.0284113	-0.00226656	0.00240485
PAI1	-0.00175071	0.137089	0.166447	-0.152899	-0.0703155	-0.121647	-0.260528	-0.0480112	-0.0241262	-0.207421	-0.0559205	0.0324091	-0.127871	0.186868	0.36816	0.0558469	0.359734
PAXILLIN	0.0448303	0.100963	-0.0146269	0.155756	-0.00614802	0.0571118	0.031975	-0.0125004	0.0757207	-0.0698868	-0.0315806	0.0583959	-0.0443477	-0.0400268	-0.0129893	-0.0590579	-0.0267599
PCNA	-0.0506203	-0.00637568	-0.00958582	-0.0415861	0.0418131	-0.010309	-0.0255703	-0.0517028	0.00176154	-0.0599223	0.0406211	0.00441582	0.0330761	-0.0352419	-0.0278877	-0.0493663	0.0259995
PDK1_pS241	-0.0291248	0.0216468	-0.00672255	0.0481644	-0.00691953	-0.0206112	-0.0207112	0.00519686	-0.0608472	-0.0271277	0.0131764	-0.0240453	-0.00333355	0.0336919	0.0427978	0.021119	-0.0263896
PEA15	-0.0303754	0.0171221	0.0194958	-0.00233453	-0.0564438	0.0207041	-0.0632641	-0.0209026	-0.000662	-0.0169796	-0.00149889	-0.0139763	-0.013311	0.0104561	-0.0304747	0.0188307	0.00780659
PI3KP110ALPHA	0.00368978	0.0172066	0.0458926	0.0337803	0.050127	-0.00891664	0.0443351	0.044801	-0.00841752	-0.0368775	0.00175057	0.0162964	0.0444406	0.0546443	0.0341696	0.0152262	-0.0226114
PKCALPHA	0.0247111	0.0622537	-0.0128712	0.0192523	0.0108901	0.104119	0.186548	0.149713	-0.0162719	-0.0268967	0.0646708	-0.0652875	-0.115398	0.167774	0.0753836	-0.0615428	-0.169881
PKCALPHA_pS657	0.0188463	0.048055	0.0135677	0.0199476	0.0282599	0.0638406	0.178822	0.17538	-0.0620817	-0.0274091	0.0852337	-0.0241386	-0.108104	0.134858	0.134146	-0.0326488	-0.13086
PKCDELTA_pS664	0.051326	0.0208637	0.0210084	0.0556088	0.0374373	-0.0110075	0.0542656	0.032424	-0.0591022	0.0191789	-0.0166193	0.0190516	-0.0390321	0.00881816	0.0304231	0.00580454	-0.0285956
PR	0.00762011	-0.0217179	0.0148204	-0.0255747	0.0289107	0.00565978	0.0353411	0.00328257	0.00464307	-0.001109	-0.00135332	-8.97442e-05	-0.0092126	-0.00929498	-0.00278234	0.00136283	-0.013606
PRAS40_pT246	0.0166202	-0.00575717	-0.0802841	-0.0149499	-0.0235257	-0.0371037	0.0338968	0.02337	0.0426404	-0.0234894	-0.058788	0.00626374	-0.0328803	-0.0197801	-0.0304804	-0.0118719	0.0484493
PTEN	0.0360272	0.0358204	-0.0533878	0.094988	-0.00433693	0.0595051	-0.000999457	-0.0177165	-0.0934661	-0.0182708	0.00126076	0.00776933	0.0829089	-0.00718479	0.040939	-0.147484	0.0740634
RAD50	-0.00937319	0.0150746	0.0204088	0.0602709	-0.0387951	0.0651573	0.020372	-0.0772866	-0.0471747	-0.0333535	0.146644	0.0616801	-0.0954359	-0.0345642	-0.0919817	-0.0269228	-0.0265164
RAD51	0.0374833	0.00206979	0.0189999	-0.0482479	0.0176274	0.00654717	-0.00451443	-0.0370718	0.0547954	-0.0032777	0.00343202	-0.0216577	-0.0195142	-0.0642269	-0.0382475	-0.0235057	0.0285247
RB_pS807S811	-0.0729382	0.0515767	-0.0690669	0.0813743	-0.0395323	-0.100784	-0.0275899	0.0823895	0.0841699	-0.0786721	-0.0493358	0.0999125	-0.0193733	-0.0673719	-0.0280478	-0.0491498	0.000680002
S6	-0.0760025	-0.0175292	-0.0343777	0.0620697	0.0607856	0.00897954	-0.0131015	-0.00832825	-0.0598675	-0.0381805	0.0299486	0.0425583	0.0363402	-0.0630359	0.0403405	0.0932927	-0.000961553
S6_pS235S236	-0.0213813	0.0108511	-0.0555137	0.00612357	-0.084818	-0.141554	-0.00718144	0.022694	-0.159446	-0.0394062	-0.0857275	0.118919	0.147158	-0.144117	0.0791182	-0.0303318	-0.115049
S6_pS240S244	0.00793678	0.0423685	-0.0145436	0.0106267	-0.0437847	-0.145462	0.0470623	-0.0341672	-0.125597	-0.0675364	-0.121414	0.116584	0.0970696	-0.109803	0.0574671	-0.0197979	-0.148869
SHC_pY317	0.053867	-0.0491624	-0.00909934	0.0100164	0.0521047	-0.0469892	0.0450213	0.0552044	-0.0154615	-0.0175248	0.0131008	0.0191996	0.0798259	-0.0159623	0.0457667	-0.0135915	0.0349167
SMAD1	-0.0931242	-0.0494111	-0.0430072	-0.0416387	-0.0396354	0.0571774	-0.026301	0.0190321	-0.0100389	0.0131736	0.0234499	0.00582588	0.0192835	0.0180908	-0.00177821	0.0394185	0.0105229
SMAD3	-0.0267853	0.01556	-0.0475295	-0.0138477	-0.0321296	0.0781269	-0.0557977	-0.0248664	0.0353292	0.0237827	0.0417893	-0.0198758	-0.0234725	-0.0374763	-0.0682721	-0.00789373	-0.00411261
SMAD4	-0.0143927	-0.01322	0.0044553	-0.0195574	0.0171988	0.011879	-0.00012524	0.0163602	0.0226035	-0.00609154	0.0158624	0.0137072	0.0173389	-0.000594413	0.0266312	-0.0259516	0.0504051
SRC	-0.0316677	0.013255	-0.00177354	-0.0144915	0.0238607	0.0087332	-0.0107584	0.0114906	0.00120496	0.0194193	-0.0311221	-0.0346355	0.030429	0.0293142	0.0341137	0.082735	-0.00407516
SRC_pY416	0.0334582	0.0122214	-0.0517981	-0.0193044	-0.0199725	-0.0588113	0.00584867	0.0656357	-0.0522062	0.00491237	-0.0995807	-0.0149584	-0.000911653	0.0288829	-0.00414591	-0.043551	0.00959067
SRC_pY527	0.0147349	0.0254815	-0.079686	-0.0256148	-0.140937	-0.158946	0.0867868	0.0245624	0.0577726	0.0576575	-0.0279553	-0.0118474	0.0852908	0.0543241	0.0503226	0.015681	0.0423959
STAT3_pY705	0.0437685	-0.0309824	-0.00733942	-0.0227967	-0.0956643	-0.0232892	0.00125609	0.0526826	-0.0549232	-0.054689	-0.0220664	0.0105145	0.0244541	0.0382478	0.0335201	0.0545565	-0.0130018
STAT5ALPHA	-0.00738723	0.173963	-0.104502	0.165282	-0.0221352	0.199052	0.084688	0.0157108	0.0138619	0.0165798	-0.215142	-0.200896	0.0335004	-0.0852929	-0.00816104	0.00128221	0.0143426
STATHMIN	0.0319825	0.00231494	0.00700708	-0.0695767	0.0101488	0.0144434	-0.0317246	0.0136739	0.0272528	0.0379816	-0.0276159	0.00577931	0.0136859	0.00439311	-0.0111762	0.0338924	-0.019227
SYK	0.0264824	-0.0232553	-0.00232021	0.0886597	0.00382299	0.0385183	-0.0920755	0.0627726	-0.299774	0.0126147	-0.127858	-0.10734	-0.0978065	-0.109078	0.160227	0.0823887	0.0377512
TUBERIN	-0.0353717	0.0515449	-0.0821932	0.0565721	0.00702552	0.0635095	0.0344829	0.0152126	0.0215626	-0.0137288	-0.0961941	-0.0314831	-0.0110986	0.00322534	0.0679637	-0.0126279	-0.0235403
VEGFR2	-0.028692	-0.0483548	-0.00548237	0.0286591	-0.0800264	0.0231492	-0.0288728	0.0215669	-0.0119678	-0.0295739	0.0609367	-0.103108	0.0118278	-0.0350753	0.0725565	-0.0188273	0.0317954
XRCC1	0.00352735	-0.00601296	0.00915922	0.0181238	0.0641229	0.000573004	0.0239679	-0.0301557	-0.0119239	-0.0117965	0.0278286	0.0679724	-0.0191167	0.0761061	-0.0752923	0.00935137	-0.0244853
YAP	0.0464392	-0.0322812	0.0254987	0.0175296	-0.00748456	0.0207629	-0.0395152	-0.00429325	0.0588699	0.00588569	0.0383644	0.0421615	0.0230628	0.047984	-0.0162617	-0.0110654	0.0410816
YAP_pS127	-0.00829663	-0.0398155	-0.0178517	0.0911712	-0.146714	-0.0230651	-0.0376242	0.0294569	0.0642909	-0.00350918	0.0805503	0.0418944	0.0605278	0.00183347	-0.0284279	-0.0305976	0.0704553
YB1	0.0104409	0.0394938	-0.022424	0.00705306	-0.0414987	0.0650978	0.00677086	-0.0668895	0.0761047	0.00529354	-0.00205334	0.00738467	-0.00432719	-0.0652992	0.0124332	-0.0687104	0.0573094
YB1_pS102	0.0137916	0.0230405	-0.0140468	0.00659494	-0.0485503	-0.0476868	-0.01735	0.0100612	0.0162979	0.0152254	0.0182665	0.0429166	0.0168395	-0.0906787	0.0161182	-0.0195552	-0.0324313
X4EBP1_pT70	-0.0318215	0.0237947	-0.00380669	-0.011145	-0.000848257	-0.037607	-0.00984787	-0.0307976	0.0164312	0.0132462	-0.0388649	-0.00409371	0.0202612	-0.0207542	-0.0343291	-0.022058	-0.010522
ARAF_pS299	0.0173343	-0.0170592	0.0437648	-0.0192077	0.0443295	-0.0440408	0.0514402	0.0120523	0.00734096	0.00463802	0.00586557	-0.0353524	0.0476772	0.00627672	-0.0123522	-0.0433314	-0.000303396
ANNEXINVII	0.0245919	-0.0237578	0.0450737	0.00122251	0.0144988	-0.0198502	0.0154834	0.0051169	-0.0598226	0.00114787	-0.00218195	-0.0300386	0.0138021	0.0114612	0.00784508	-0.0440627	0.00867486
ARID1A	0.0235604	0.0120002	-0.02217	0.0102413	0.0234762	0.0363333	0.0072721	0.00561636	-0.00441267	-0.00982246	-0.0328616	0.051595	-0.0236472	0.0527649	0.0208344	0.0151063	-0.0354441
BRAF	-0.0515698	0.0224318	-0.110726	0.103328	0.0340884	0.0669711	0.03131	0.0355429	-0.000716525	-0.0115727	-0.0415628	-0.0261592	-0.0163756	-0.000195528	0.0957598	-0.00039305	-0.00721315
BAD_pS112	0.0236834	0.0211435	-0.0664537	0.0635368	-0.0290648	-0.0353538	0.00224697	0.0476974	-0.0245554	0.042951	-0.00302141	0.0327923	-0.00417298	-0.0124217	0.00322828	-0.0105848	0.0430536
BAP1C4	-0.0713538	0.0098587	-0.0598531	0.0370441	0.0665385	0.0591512	0.0625281	-0.0146691	0.0232471	-0.0247347	-0.0205389	0.0199166	0.0220928	-0.0275158	0.000813057	-0.0286057	0.0146585
CD20	0.067047	0.0100201	-0.0225796	-0.0497559	0.0237131	0.0527209	0.0331328	-0.0501931	-0.0104201	0.0208482	-0.0209224	-0.00587614	-0.0313378	0.000798801	-0.0857481	-0.00652323	0.013658
CYCLINE2	-0.000418581	-0.00130917	-0.00921683	-0.0107653	0.095901	0.0343845	0.0561612	-0.0417231	0.025948	-0.00898256	0.00785484	0.0018041	0.0047816	-0.0822455	-0.0189624	0.0265467	0.0612785
ETS1	0.0791957	0.0731843	-0.0139577	-0.0176586	-0.0702235	0.0242974	0.0121143	-0.152162	-0.0256177	0.0645422	0.0328122	-0.0344271	-0.196455	-0.0851471	-0.0220926	-0.149379	-0.0262696
EIF4G	-0.108846	-0.000458306	-0.0692878	0.0535407	0.00878002	0.120537	0.0292422	0.0300741	0.0502236	-0.0147856	-0.118801	0.0132487	0.0129074	-0.0265467	-0.00611317	-0.0372066	0.00195701
FASN	-0.270039	0.0222318	-0.0494091	-0.112707	0.00648558	-0.0695395	-0.0191142	-0.0525445	0.0820196	-0.0888359	-0.0144624	-0.0807813	0.163776	0.041994	0.0157374	0.13992	-0.166626
FOXO3A_pS318S321	0.0106734	-0.00579303	-0.00177381	0.00230833	-0.0163878	-0.0347602	0.00410064	0.0130444	0.00405298	0.0186754	-0.00326207	-0.0148071	0.000243636	-0.00642325	-0.0221142	-0.0160949	0.0160956
FOXM1	-0.0388288	0.00835734	0.0243934	-0.0405192	0.0943947	-0.00850658	0.082276	-0.0239624	0.0576834	-0.00645245	-0.0502435	0.0124257	0.0493448	-0.0636579	-0.0151783	-0.00587037	-0.062201
G6PD	0.0606155	0.00999395	0.0627683	0.00929132	0.0427109	-0.0442082	0.00508834	-0.030883	-0.0870437	-0.0261662	-0.00417058	-0.0448608	-0.0594882	-0.0293699	0.0929613	-0.0428523	-0.0156627
GAPDH	-0.197559	0.154255	0.0242923	0.0625567	-0.00601555	-0.138186	0.0343193	-0.111678	-0.12726	-0.171284	0.21661	-0.0131193	-0.304304	-0.0447363	-0.0645169	-0.155785	0.117283
GSK3_pS9	-0.05157	0.0537062	-0.108056	0.0890381	-0.103004	-0.206945	0.0402411	0.0969799	0.0512107	-0.0155187	-0.0294805	0.018684	-0.0459681	-0.0653096	-0.0528491	-0.000681381	0.0347613
HEREGULIN	0.0807092	-0.0223418	0.0137773	-0.0797333	0.0567862	-0.0282223	0.0347186	-0.000463528	0.00715075	-0.00460893	0.00607747	0.0284082	-0.0207385	0.0182117	-0.0466012	-0.017106	0.0199364
MYH11	0.0617801	-0.119008	0.0804629	-0.171447	-0.483058	0.187533	0.506321	-0.273554	-0.150155	-0.27516	0.00392994	0.106528	0.108725	-0.133432	0.0433346	0.161677	0.0701685
MYOSINIIA_pS1943	-0.0393495	-0.00790671	-0.0119195	0.0198243	-0.0523739	-0.00211347	-0.0348913	-0.00437723	-0.0751595	-0.068768	-0.027275	-0.00367746	-0.0467261	0.0253801	0.0488126	-0.0588908	-0.0732113
NRAS	0.0312797	-0.020722	0.0433711	-0.0413645	0.0490848	-0.0259405	0.0365112	0.0122223	0.0133425	0.0222254	-0.013069	-0.0141938	0.0344854	0.0112416	0.0126694	0.00455504	0.0189036
NDRG1_pT346	0.0146072	0.138708	0.0419528	0.0101423	-0.0637757	-0.235505	0.192458	0.144536	0.159411	-0.0973851	-0.0258725	-0.277325	-0.0927063	0.179792	-0.0437474	0.0269369	0.0924186
P21	-0.0303046	0.0207135	0.0359465	-0.0255653	-0.0515024	-0.0160889	-0.0317114	-0.00208794	0.0205841	0.00300435	-0.00735067	0.0130559	-0.0573803	-0.0474299	-0.00600494	-0.0287037	-0.0536766
P27_pT198	0.00581318	0.00358507	0.00618804	-0.0376104	0.00630656	0.0113595	-0.0104137	0.00156395	-0.00710264	0.0469825	-0.0447402	-0.00837052	-0.0153609	-0.0161767	-0.00627939	0.031754	0.00568605
P90RSK	0.0143332	-0.0469076	-0.0203489	0.0271515	0.0502077	-0.0280378	0.00604939	0.0216085	-0.108341	0.0282793	0.0338265	0.012397	0.00199039	-0.0183445	0.121056	-0.0240363	-0.0291619
PDCD4	0.0593607	-0.0406507	-0.151832	0.164023	-0.126981	-0.0385405	-0.0526242	0.0906921	-0.137457	0.133997	0.122363	0.110263	0.136091	-0.0478725	-0.0985026	-0.0229176	0.0579768
PDK1	0.0249046	0.00565313	0.049301	0.0134166	0.0380422	-0.0304599	0.0693474	-0.0102787	-0.0599803	-0.00402087	-0.0389962	0.0523493	-0.0463272	0.0669712	-0.022856	-0.0191429	-0.0468856
PEA15_pS116	0.0762686	0.0667431	-0.0161362	-0.0643223	-0.00751674	0.0359659	-0.0060957	-0.0900646	0.0336617	-0.0295198	0.0560693	-0.0923588	-0.132317	-0.120619	-0.206269	-0.151907	-0.0466274
PI3KP85	-0.0262403	0.0857208	0.008424	0.0519248	-0.0215125	0.00880549	-0.0362121	-0.0414971	-0.0686154	-0.0153645	-0.0567807	-0.0847758	0.0604188	0.0231277	-0.00461596	0.00745383	-0.0169129
PKCPANBETAII_pS660	0.0438458	0.0673889	-0.0828196	0.164251	-0.0389773	-0.0268771	-0.0084039	0.0959328	-0.135865	0.00352674	0.031155	0.00390104	0.00223683	-0.0612076	0.0383886	0.035851	-0.0272792
PRDX1	0.0272271	-0.00686971	0.0413145	0.0165126	0.0374765	-0.041679	-0.00200353	-0.0500961	-0.0805393	0.0667287	0.0211123	-0.0739799	0.0139066	-0.0319544	-0.00365627	-0.052818	0.0961091
RAB11	0.0446931	0.0104488	0.0499444	-0.00877291	-0.0802139	0.00929496	-0.0253078	-0.0378499	0.0486424	0.0550767	0.0299506	-0.0210739	-0.0373079	-0.0256697	0.0118199	-0.0456214	-0.0330283
RAB25	0.00154876	-0.210967	0.112638	0.0438228	0.115404	-0.083559	0.112956	0.0266657	-0.0400843	-0.0150192	0.0476595	-0.0393398	0.0075469	0.00346069	0.0104053	-0.0491413	0.0480578
RAPTOR	0.000729032	0.0309635	-0.0345053	0.0419164	-0.0067084	0.0255566	0.00132326	-0.0130149	0.0164085	-0.0144985	0.0369106	-0.00347959	0.0195614	0.00140388	0.0291611	0.0619044	-0.065292
RBM15	-0.101333	0.00873849	-0.0921081	0.105849	0.0376469	0.109108	-0.00632286	0.0243512	-0.0209121	-0.00222552	0.0397309	0.0277463	0.00284502	-0.0614833	-0.0605096	0.0635792	-0.030438
RICTOR	-0.0288663	0.00045846	-0.0513124	-0.000528142	-0.100193	0.103056	0.148466	-0.0203737	-0.0170253	-0.065787	-0.065075	0.0477555	0.0543966	0.0274218	0.0700975	0.0860933	-0.00632135
RICTOR_pT1135	0.0286245	0.00245386	-0.0594239	-0.0459642	-0.0362131	-0.00774706	-0.0276556	0.0222124	0.0555765	0.0183003	0.00758002	-0.0328559	0.0169209	-0.0301808	-0.0138561	0.0255069	0.00127744
SCD1	0.0444176	-0.00291242	0.0781899	-0.00582535	0.130984	-0.0849033	0.114828	-0.0342659	-0.00510506	-0.0226973	-0.0194266	0.0101156	0.00659791	0.0244084	-0.0328569	-0.0542418	-0.0112941
SF2	0.00714724	-0.0171857	0.0202766	0.012863	0.0637598	-0.0348262	0.041606	0.00160036	-0.0319007	0.013699	-0.0079068	0.0603076	-0.0290151	0.0808491	-0.0445697	0.0226942	-0.0339374
TAZ	0.0284974	0.02707	-0.00862464	-0.0536132	-0.032619	0.0335803	-0.0257795	0.0151758	0.0563768	-0.0198081	-0.0121482	0.0114573	-0.0225948	0.00872082	0.0422575	-0.0246326	-0.0177578
TIGAR	0.409331	-0.043413	-0.378096	-0.142545	0.11555	-0.0327901	-0.178073	0.0333442	0.0176	-0.403903	0.112586	-0.177561	0.11022	0.000248693	-0.166258	0.176965	-0.190412
TRANSGLUTAMINASE	-0.0118197	-0.0628137	-0.0232408	-0.0490998	0.000484615	0.0339403	-0.0374573	0.00392295	-0.0535154	-0.0655709	-0.00499585	-0.0350393	-0.0699886	-0.0608796	-0.0195466	-0.00844037	0.00871363
TFRC	-0.242695	0.0392698	0.00818791	-0.106064	0.0140915	-0.103896	-0.213338	-0.195622	-0.039165	-0.186166	-0.0226193	-0.00325272	-0.0680131	-0.0904778	0.0833321	0.0624119	-0.027856
TSC1	-0.0514605	0.00802173	-0.0175345	0.0331007	-0.0399653	0.060453	-0.00408672	0.025384	-0.0185572	-0.0344855	-0.0116889	-0.00346714	0.00865914	0.049716	0.0565097	0.042838	-0.0225578
TUBERIN_pT1462	0.0164164	0.0521056	-0.0629428	0.0307847	-0.000513565	-0.109239	0.0945694	0.0326962	0.0709169	0.0216289	-0.067807	-0.0387266	-0.0312832	-0.00124805	0.00166371	-0.00603996	0.0231466
EPPK1	-0.193143	-0.497594	0.202748	0.208767	-0.127485	-0.0449656	-0.0653966	0.00440167	0.0557432	-0.13175	-0.126936	-0.281733	0.0788924	0.209497	-0.105315	-0.237224	-0.154148
XBP1	-0.00187464	-0.00191324	0.0369979	-0.0143264	-0.030315	0.00123023	0.0305652	-0.0348406	0.0270703	0.0333274	0.039363	-0.0283685	0.013812	-0.0382878	0.00456971	-0.0344319	-0.00921634
ACETYLATUBULINLYS40	-0.073518	-0.0402298	0.0385058	0.0716984	0.090248	0.0937724	0.0747297	0.052131	0.204125	-0.0905165	0.0825054	-0.0268931	-0.0892762	-0.111941	0.170956	0.251427	0.199367
P62LCKLIGAND	-0.0343456	0.0343573	0.0141928	0.0525292	0.0998936	-0.0424166	0.0730434	-0.0631852	-0.0846339	-0.0413789	-0.117279	-0.00268935	0.0296364	-0.0720841	0.0458274	-0.0392599	-0.023093
X1433BETA	0.0428986	-0.0149984	0.0348983	-0.0184462	0.0331875	-0.0160797	0.0258515	0.00803088	-0.00511731	0.0219835	-0.0138137	0.0139071	-0.0156071	0.0185508	0.000232254	0.00676081	-0.0684613
X1433ZETA	-0.0669566	0.0220402	0.0131493	-0.00536688	-0.0445246	-0.00277693	-0.0782526	-0.0494961	-0.0247491	-0.0382121	0.0447659	0.00734411	0.0152979	0.0279152	-0.038328	-0.0369982	0.022025
ACVRL1	0.0454485	-0.00164242	0.0692493	-0.0205453	0.0414643	-0.0272478	0.0496386	0.020768	-0.0298745	0.0322425	-0.0272914	0.0112683	-0.0222635	0.0276641	0.0045427	-0.00435726	-0.0546995
DIRAS3	0.0466984	-0.0320826	-0.0050761	-0.0424656	0.0299236	-0.018426	0.0134633	0.0253072	0.0245153	0.00971894	0.0131033	-0.0106547	0.0192428	-0.0110486	0.0701978	0.00396852	0.0212216
ANNEXIN1	0.133738	9.69989e-05	0.239914	0.29084	-0.0750002	0.072917	-0.127108	0.172099	0.0541176	-0.214533	0.0173396	-0.0487834	0.166818	0.0475432	-0.0673682	-0.0322379	0.105301
PREX1	0.0267141	0.0787282	0.0836338	0.0418215	0.0636923	-0.0224345	0.0798011	0.0668039	-0.179972	-0.0263576	-0.075571	-0.0647008	-0.0766266	0.0672544	0.0484234	0.067534	-0.138498
ADAR1	-0.0205796	0.0204404	0.00283247	0.0253664	0.072468	0.00940234	0.0291034	-0.00147882	0.0593725	0.000399034	-0.0272744	-0.0427975	0.0725847	-0.0602702	0.0151734	-0.00463137	0.0785986
JAB1	-0.0175731	-0.015988	0.0563794	-0.00296574	0.062443	-0.0464293	0.0499871	0.00682514	0.0161493	-0.0016922	0.0651637	-0.0686634	0.0674221	-0.0425173	0.0526096	-0.0503112	0.0511891
CMET	0.0486259	0.0091784	-0.00359634	-0.0176451	-0.0177157	-0.00537087	-0.00680737	-0.0245013	0.0346458	0.0299405	0.0124836	0.00514744	-0.0118025	-0.0113957	0.0331006	0.0109259	0.0258693
CASPASE8	-0.0150904	0.0145695	0.0193439	-0.0484429	-0.0144205	-0.0044355	-0.0177531	-0.00574236	0.0248034	0.0102294	0.00286062	-0.0642592	-0.014031	-0.0409551	0.00340714	-0.00205971	0.0580649
ERCC1	0.0769703	0.00803739	-0.0462164	-0.0371648	0.040538	0.00571085	0.0161903	-0.0274153	0.000503553	-0.0527675	0.00817136	0.00141307	-0.034496	0.0185778	-0.0297504	-0.0104723	-0.0277641
MSH2	-0.0313648	-0.00374685	-0.00678805	0.0443135	0.0712372	0.00954329	0.0218412	0.0110735	0.00147384	-0.0144089	0.0294197	0.042339	0.0436238	0.012753	0.0242255	0.0448355	-0.00781477
MSH6	-0.0928561	0.013655	-0.0828784	0.017506	0.0409337	0.0914356	0.00664511	-0.0207165	0.0390047	-0.0500634	0.00114786	0.0626462	-0.00145768	-0.0694152	-0.0174099	-0.0343556	-0.0117607
PARPCLEAVED	0.0089383	-0.00694097	0.0305922	-0.0263673	0.0605659	-0.0141236	0.0440875	-0.00979281	0.0240988	0.0234209	-0.0051952	0.00425131	0.0320422	0.0129116	0.00387377	-0.0107923	0.0236126
RB	0.0544209	0.022657	0.00528946	-0.0387176	-0.0177933	-0.0131428	-0.0149096	-0.0366988	0.0482278	0.0205088	0.00260884	0.00938443	-0.0464889	0.000931741	0.0240336	-0.00636765	-0.0108326
SETD2	0.018989	-0.0114684	0.0263621	-0.0418833	-0.000873334	0.000329065	-0.0205918	-0.00724232	0.0341956	0.0305919	0.000957293	-0.00279772	0.0255385	-0.00950241	0.0202238	-0.00311405	0.0124739
SMAC	0.0417185	0.0201087	0.139054	0.0991363	0.152581	-0.0660469	0.13108	-0.0606576	-0.0283642	-0.0376649	0.0908569	0.0711937	-0.0271365	-0.0271845	-0.0850726	-0.054154	0.099701
SNAIL	0.0402049	0.00171177	0.0266845	-0.0470857	0.019374	-0.00705003	0.0228975	-0.0156524	0.031296	0.0095169	-0.0103547	0.0472309	-0.0491508	0.0315872	0.0133732	-0.00419381	-0.00352289
BRD4	-0.107086	0.0228144	-0.071082	0.056323	-0.00545549	0.159725	0.00241928	-0.037761	-0.0738789	0.0368991	-0.121534	0.225328	-0.0939164	0.435135	-0.337438	0.211253	0.0684442
CDK1_pY15	-0.000608215	0.00639184	0.00801393	0.0259022	0.00695502	-0.0498202	-0.000970439	-0.0453252	0.0340417	0.0499049	-0.0790178	0.117642	0.123233	0.0955798	-0.11422	0.0805389	0.120855
ARAF	-0.0318797	-0.0228984	-0.0235821	0.0018326	-0.011557	0.0184118	-0.0350793	0.0395347	-0.0629609	0.0248796	-0.0180927	0.00990177	0.054668	0.0712271	0.0106734	0.043388	0.027822
BRAF_pS445	-0.0240419	0.00704487	-0.0266092	0.0481246	-0.00118885	-0.0858549	-0.00251846	0.0155256	-0.0818094	-0.00184379	0.0695459	0.0202127	0.0302968	0.0256232	0.0767544	-0.00774873	-0.00831166
BCL2A1	-0.00562046	-0.00210785	0.0115309	-0.0577241	-0.0483728	0.000371921	-0.067937	-0.00548626	0.0304529	0.0417569	0.00290083	-0.0165238	0.0204441	0.020287	-0.00917606	0.0150216	-0.00764536
CABL	-0.0202267	-0.00173947	-0.00498186	-0.011271	-0.0274049	0.00598979	-0.049702	-0.0099937	0.00125973	0.0206808	0.0166228	0.026635	0.00409001	0.0573204	-0.0266024	0.0197454	-0.003586
CASPASE3	-0.0329228	-0.0160861	0.000151494	-0.0183429	0.0248613	0.0015873	-0.0314675	0.00408166	0.00647627	0.0174712	0.0128143	0.0140528	0.0481413	0.0393387	-0.00348853	0.0414442	0.0712613
CD26	-0.00664347	-0.0119787	0.00794596	-0.00405863	-0.0502666	0.00363268	-0.0411594	-0.0151953	0.020228	0.00611173	0.0348359	-0.0280575	0.0431896	0.0112332	-0.00741429	-0.0103888	0.0445054
CHK1_pS296	-0.00595504	-0.00391776	-0.00176105	-0.0409904	-0.0208775	0.00168995	-0.0479715	0.00268486	-0.00872215	0.0160087	-0.0157627	0.00229164	0.000296497	0.010741	0.0086598	0.0325149	-0.0221359
COG3	-0.0256177	-0.0122033	-0.0370984	0.0495855	0.0514126	0.00217723	0.0253248	0.0023376	-0.0159584	-0.0120038	0.0264009	-0.0131423	-0.0300357	-0.0309693	0.0576664	0.0228408	-0.0316402
DUSP4	0.0401488	0.255813	0.0777273	0.105092	0.107997	-0.0814727	0.0235207	-0.0089006	0.0421613	-0.153202	-0.0436519	-0.0389613	0.17126	0.0447992	-0.0366326	0.0456052	-0.0152409
ERCC5	-0.0564435	0.0224636	-0.0143481	-0.00595254	-0.0441471	-0.0195274	-0.0271799	-0.0406877	-0.0317028	0.0395435	-0.0651296	0.110928	-0.0463917	0.167806	-0.140654	0.0852973	0.0543519
IGF1R_pY1135Y1136	0.00439788	-0.00926694	0.00463753	-0.0362796	-0.0346604	-0.0067147	-0.0477516	0.0246185	0.0243042	0.0413081	0.0101144	-0.0107419	0.0601426	0.0414928	-0.000906431	0.0294791	0.0245499
IRF1	-0.0121843	0.0205472	-0.00386111	-0.0266908	-0.0444477	0.0096202	-0.0471532	-0.0324924	-0.0144183	0.0484496	-0.0298304	-0.0498084	0.00481757	0.0227565	-0.0820948	0.0173036	0.0274863
JAK2	-0.0314364	0.0144684	-0.0271998	0.0303117	0.00454869	0.0373032	-0.0050351	-0.0197826	-0.0557278	0.00857158	-0.0259528	-0.000765358	-0.00778972	0.0293593	-0.0496949	0.0553424	0.0269504
P16INK4A	-0.0831518	0.00745319	0.085855	-0.011162	0.0301956	-0.0486912	-0.0290397	-0.0758945	0.0683934	-0.0455728	-0.0207869	-0.00886379	0.0829893	-0.11011	-0.00567951	-0.0667828	-0.0499789
SHP2_pY542	-0.0289947	-0.0513442	-0.0338801	-0.00196266	-0.0662208	-0.0125771	-0.0357855	0.085555	0.0252424	0.0464963	0.0249287	-0.0262755	0.11161	0.0425405	-0.0240916	0.0387254	0.117658
PDL1	0.0114391	0.0087888	0.0542013	-0.0377337	-0.00552625	0.0108368	-0.0423368	0.0191367	-0.0222339	0.0977712	-0.0636741	-0.0977512	0.0710932	-0.0644935	-0.0184969	0.0605514	0.14642
