# Supplementary material for: Overcoming resistance to BRAFV600E inhibition in melanoma by deciphering and targeting personalized protein network alterations
Source: NPJ Precis Oncol. 2021 Jun 10;5:50. doi: 10.1038/s41698-021-00190-3 (PMC8192524; doi:10.1038/s41698-021-00190-3)
Supplement: Supplementary file 3 — Supplementary Data 2 [file 41698_2021_190_MOESM3_ESM.xlsx]

## Sheet: Unbalanced processes
Unbalanced process (α)	Proteins and phosphoproteins that participate in the unbalanced process * The fuctional connections between the proteins are presented in Figure S1 ** The degree of participation (G) is listed in parenthesis for each protein *** Note that (+/-) signs represent correlation or anti-correlation between proteins in the process, and not direction of change in expression level	Number of SKCM patients that harbor this process	Number of THCA patients that harbor this process	Total number of patients that harbor this process
1	pS(79)ACC1,ACC1 (-0.22), Bcl2 (0.12), Claudin7 (0.20), Cyclin B1 (-0.21), Era (-0.12), Fibronectin (0.16), pS(21)GSK3a,pS(9)GSK3b (-0.11), IGFBP2 (-0.13), LKB1 (0.10), EIF4G (-0.11), Fasn (-0.27), GAPDH (-0.20), RBM15 (-0.10), TIGAR (0.41), TFRC (-0.24), EPPK (-0.19), Annexin1 (0.13), BRD4 (-0.11)	46	372	418
2	Akt (0.15), AR (-0.11), ATM (0.10), cKit (0.12), cleaved caspase7 (0.11), Claudin7 (-0.29), E-cadherin (-0.28), EEF2 (0.10), ERa (-0.24), Gab2 (0.12), Her2 (-0.12), Her3 (0.12), INPP4B (-0.10), PAI1 (0.14), Paxillin (0.10), Stat5a (0.17), GAPDH (0.15), MYH11 (-0.12), pT(346)NDRG1 (0.14), RAB25 (-0.21), EPPK1 (-0.50), DUSP4 (0.26)	331	4	335
3	TP53BP1 (-0.15), Akt (-0.11), cKit (-0.12), Claudin7 (-0.28), E-cadherin (-0.12), Fibronectin (0.37), pS(21)GSK3a,pS(9)GSK3b (-0.17), Her2 (-0.11), HSP70 (0.12), PAI1 (0.17), Stat5a (-0.10), BRAF (-0.11, pS(9)GSK3b (-0.11), PCDC4 (-0.15), RAB25 (0.11), TIGAR (-0.38), EPPK1 (0.20), Annexin1 (0.24), SMAC (0.14)	27	138	165
4	b-catenin (0.29), cMyc (-0.10), CollagenVI (-0.11), cyclin B1 (-0.15), E-cadherin (0.26), ERK2 (0.10), Fibronectin (0.20), IGFBP2 (-0.11), pT(180)Y(182)p38 (0.12), PAI1 (-0.15), Paxillin (0.16), Stat5a (0.17), BRAF (0.10), Fasn (-0.11), MYH11 (-0.17), PCDC4 (0.16), pS(660)PKCb (0.16), RBM15 (0.11), TIGAR (-0.14), TFRC (-0.11), EPPK1 (0.21), Annexin1 (0.29), DUSP4 (0.11)	39	78	117
5	EIF4EBP1 (-0.17), Caveolin1 (-0.33), CollagenVI (-0.12), cyclin B1 (0.10), pS(21)GSK3a (-0.15), HSP70 (-0.17), pT(202)Y(204)MAPK (-0.12), pT(180)Y(182)p38 (-0.14), pY(527)Src (-0.14), pS(127)Yap (-0.15), pS(9)GSK3b (-0.10), MYH11 (-0.48), PCDC4 (-0.13), RAB25 (0.12), Rictor (-0.10), SCD1 (0.13), TIGAR (0.12), EPPK1 (-0.13), SMAC (0.15), DUSP4 (0.11)	38	32	70
6	EIF4EBP1 (0.17), TP53BP1 (-0.11), pS(473)Akt,pT(308)Akt (0.25), E-cadherin (0.23), Gab2 (-0.11), pS(21)GSK3a (0.16), pT(202)Y(204)MAPK (0.17), pT(180)Y(182)p38 (0.11), PAI1 (0.12), PKCa (-0.10), pS(807/811)Rb (0.10), pS(235/236)S6,pS(240/244)S6 (0.14), pY(527)Src (0.16), Stat5a (-0.20), EIF4G (-0.12), GAPDH (0.14), pS(9)GSK3b (0.21), MYH11 (-0.19), pT(346)NDRG1 (0.24), RBM15 (-0.11), Rictor (-0.1…	63	10	73
7	pS(473)Akt (-0.16), Fibronectin (0.13), HSP70 (0.14), Mek1 (-0.12), pT(389)S6K (-0.10), PAI1 (0.26), PKCa,pS(657)PKCa (-0.19), MYH11 (-0.51), pT(346)NDRG1 (-0.19), RAB25 (-0.11), Rictor (-0.15), SCD1 (-0.11), TIGAR (0.18), TFRC (0.21), Annexin1 (0.13), SMAC (-0.13)	17	21	38
8	pS(473)Akt (-0.11),Bcl2 (0.16),b-catenin (0.15),cKit (0.38),E-cadherin (0.45),IGFBP2 (-0.25),PKCa,pS(657)PKCa (-0.15),ETS1 (0.15),GAPDH (0.11),MYH11 (0.27),pT(346)NDRG1 (-0.14),TFRC (0.20),Annexin1 (-0.17)	36	1	37
9	cKit (-0.14),cleaved caspase7 (0.32),Fibronectin (-0.21),Gab2 (-0.14),Her3 (-0.24),HSP70 (-0.11),IGFBP2 (-0.18),Lck (0.17),pT(180)Y(182)p38 (0.13),pS(235/236)S6,pS(240/244)S6 (0.16),Syk (0.30),GAPDH (0.13),MYH11 (0.15),pT(346)NDRG1 (-0.16),p90RSK (0.11),PCDC4 (0.14),pS(660)PKCb (0.14),Acetyl-a-Tubulin (Lys40) (-0.20),PREX1 (0.18)	16	4	20
10	Claudin7 (0.29), cyclin B1 (0.15), E-cadherin (-0.15), EEF2 (0.12), Fibronectin (0.24), HSP70 (-0.27), PAI1 (0.21), GAPDH (0.17), MYH11 (0.28), PCDC4 (-0.13), TIGAR (0.40), TFRC (0.187), EPPK1 (0.13), Annexin1 (0.21), DUSP4 (0.15)	7	4	11
11	cKit (-0.16), cleaved caspase7 (-0.25), Caveolin1 (0.27), Claudin7 (-0.28), Fibronectin (-0.31), Gab2 (-0.12), HSP70 (-0.11), Lck (-0.15), pS(536)NFkB (-0.26), RAD50 (0.15), pS(240/244)S6 (-0.12), STAT5a (-0.22, Syk (-0.13), EIF4G (-0.12), GAPDH (0.22), PCDC4 (0.12), TIGAR (0.11), EPPK1 (-0.13), ZIP (-0.12), BRD4 (-0.12)	3	7	10
12	EIF4EBP1 (0.11), cleaved caspase7 (-0.32), Caveolin1 (-0.29), E-cadherin (-0.21), Fibronectin (0.28), Her3 (-0.16), Lck (-0.19), pS(235/236)S6,pS(240/244)S6 (0.12), STAT5a (-0.20), Syk (-0.11), VEGFR2 (-0.10), MYH11 (0.11), pT(346)NDRG1 (-0.28), PCDC4 (0.11), TIGAR (-0.18), EPPK1 (-0.28), BRD4 (0.23), pY(15)CDK1 (0.12), ERCC5 (0.11)	6	1	7
13	pS(473)Akt,pT(308)Akt (-0.19), b-catenin (-0.11), Integrin a2 (-0.11), Claudin7 (-0.19), cyclin B1 (0.10), Fibronectin (-0.11), Her3 (0.11), HSP70 (-0.15), IGFBP2 (-0.26), pT(202)Y(204)MAPK (0.13), PAI1 (-0.13), PKCa,pS(657)PKCa (-0.12), pS(235/236)S6 (0.15), ETS1 (-0.20), FASN (0.16), GAPDH (-0.30), MYH11 (0.11), PCDC4 (0.14), pS(116)PEA15 (-0.13), TIGAR (0.11), Annexin1 (0.17), pY(15)CDK1 (0.12…	4	1	5
14	Bcl2 (0.14), cKit (0.31), Caveolin1 (0.12), CollagenVI (0.13), Fibronectin (-0.15), Her3 (-0.11), HSP70 (-0.14), PAI1 (0.19), PKCa,pS(657)PKCa (0.17), pS(235/236)S6,pS(240/244)S6 (-0.14), Syk (-0.11), MYH11 (-0.13), pT(346)NDRG1 (0.18), pS(116)PEA15 (-0.12), EPPK1 (0.21), Acetyl-a-Tubulin (Lys40) (-0.11), BRD4 (0.44), ERCC5 (0.17), p16INK4a (-0.11)	1	2	3
15	Akt (0.11), pT(172)AMPKa (0.10), ATM (0.13), Bak (-0.10), b-catenin (0.10), cKit (0.22), cleaved caspase7 (-0.23), Fibronectin (-0.10), HSP70 (0.12), PAI1 (0.37), pS(657)PKCa (0.13), Syk (0.16), p90RSK (0.12), pS(116)PEA15 (-0.21), TIGAR (-0.17), EPPK1 (-0.11), Acetyl-a-tubulin (Lys40) (0.17), BRD4 (-0.34), pY(15)CDK1 (-0.11), ERCC5 (-0.14)	3	1	4
16	pS(473)Akt,pT(308)Akt (0.13), ATM (0.16), b-catenin (0.13), cKit (-0.24), cleaved caspase7 (0.14), Claudin7 (-0.23), E-cadherin (0.28), EEF2 (-0.13), eIF4e (-0.14), Fibronectin (0.17), Mek1 (-0.18), pS(536)NFkB (-0.11), PTEN (-0.15), ETS1 (-0.15), FASN (0.14), GAPDH (-0.16), MYH11 (0.16), pS(116)PEA15 (-0.15), TIGAR (0.18), EPPK1 (-0.24), Acetyl-a-tubulin (Lys40) (0.25), BRD4 (0.21)	3	0	3
17	ACC1 (-0.13), ASNS (-0.11), BAK (0.17), Claudin7 (0.20), Fibronectin (-0.13), Her3 (0.17), HSP70 (-0.30), pS(536)NFkB (0.12), PAI1 (0.36), PKCa,pS(657)PKCa (-0.17), pS(235/236)S6,pS(240/244)S6 (-0.12), FASN (-0.17), GAPDH (0.12), TIGAR (-0.19), EPPK1 (-0.15), Acetyl-a-tubulin (Lys40) (0.20), Annexin1 (0.11), PREX1 (-0.14), pY(15)CDK1 (0.12), pY(542)SHP2 (0.12), PDL1 (0.15)	3	0	3
