# Supplementary material for: Overcoming resistance to BRAFV600E inhibition in melanoma by deciphering and targeting personalized protein network alterations
Source: NPJ Precis Oncol. 2021 Jun 10;5:50. doi: 10.1038/s41698-021-00190-3 (PMC8192524; doi:10.1038/s41698-021-00190-3)
Supplement: Supplementary file 7 — Supplementary Data 6 [file 41698_2021_190_MOESM7_ESM.xlsx]

## Sheet: SKCM selected genomic mutations
Patient index	Sample ID	Case ID	Cancer_Type	Sample_Type	Patient-specific barcode	BRAFV600E	NRASQ61L	NRASQ61R	NRASQ61K	KITL576P	KITK642E
1	TCGA-BF-A5EO-01A-21-A443-20	TCGA-BF-A5EO	SKCM	Primary	[ 1. 1. 1. -1. 0. -1. -1. 0. 0. 0. 0. 0. 0. 0. 0. 0. 1.]	-	-	Q61R	Q61K	-	-
2	TCGA-EB-A5UM-01A-21-A443-20	TCGA-EB-A5UM	SKCM	Primary	[ 1. 0. 0. 0. 0. 0. 0. 0. 0. 0. 0. 0. 0. 0. 0. 0. 0.]	-	-	-	-	-	-
3	TCGA-ER-A2NB-01A-21-A20N-20	TCGA-ER-A2NB	SKCM	Primary	[ 0. 0. 1. 0. 0. 0. 0. 0. 0. 0. 0. 0. 0. 0. 0. 0. 0.]	-	-	Q61R	-	-	-
4	TCGA-EB-A4OY-01A-21-A443-20	TCGA-EB-A4OY	SKCM	Primary	[ 1. 1. 1. -1. -1. 0. 0. 0. 0. 0. 0. 0. 0. 0. 0. 0. 0.]	-	-	-	-	-	-
5	TCGA-EB-A551-01A-11-A443-20	TCGA-EB-A551	SKCM	Primary	[ 0. 1. 0. 0. 0. 0. 0. 0. 0. 0. 0. 0. 0. 0. 0. 0. 0.]	-	-	-	Q61K	-	-
6	TCGA-WE-A8K4-01A-21-A443-20	TCGA-WE-A8K4	SKCM	Primary	[ 1. 0. 0. 0. -1. 0. 0. 0. 0. 0. 0. 0. 0. 0. 0. 0. 0.]	-	-	-	-	-	-
7	TCGA-EB-A44O-01A-21-A443-20	TCGA-EB-A44O	SKCM	Primary	[ 0. 1. 0. 0. 0. 0. 0. 0. 0. 0. 0. 0. 0. 0. 0. 0. 0.]	-	-	-	Q61K	-	-
8	TCGA-EB-A4XL-01A-21-A443-20	TCGA-EB-A4XL	SKCM	Primary	[ 0. 1. 0. 0. -1. 0. 1. 0. 0. 0. 0. 0. 0. 0. 0. 0. 0.]	-	-	-	Q61K	-	-
9	TCGA-EB-A5VU-01A-11-A443-20	TCGA-EB-A5VU	SKCM	Primary	[ 0. 1. 0. 0. 0. 0. 0. 0. 0. 0. 0. 0. 0. 0. 0. 0. 0.]	-	-	Q61R	-	-	-
10	TCGA-EB-A3Y7-01A-21-A241-20	TCGA-EB-A3Y7	SKCM	Primary	[ 0. 1. 0. 0. 0. 0. 0. 0. 0. 0. 0. 0. 0. 0. 0. 0. 0.]	-	-	-	-	-	-
11	TCGA-EB-A41A-01A-21-A444-20	TCGA-EB-A41A	SKCM	Primary	[ 0. 1. 0. 0. 0. 0. 0. 0. 0. 0. 0. 0. 0. 0. 0. 0. 0.]	-	-	-	-	-	-
12	TCGA-D9-A3Z4-01A-21-A241-20	TCGA-D9-A3Z4	SKCM	Primary	[ 0. 1. 0. 0. 0. 0. 0. 0. 0. 0. 0. 0. 0. 0. 0. 0. 0.]	-	-	Q61R	-	-	-
13	TCGA-XV-A9VZ-01A-21-A444-20	TCGA-XV-A9VZ	SKCM	Primary	[ 0. 1. 0. 0. 0. 0. 0. 0. 0. 0. 0. 0. 0. 0. 0. 0. 0.]	-	-	-	-	-	-
14	TCGA-D9-A1X3-01A-21-A20M-20	TCGA-D9-A1X3	SKCM	Primary	[ 0. 1. 0. 0. 0. 0. 0. 0. 0. 0. 0. 0. 0. 0. 0. 0. 0.]	-	-	-	-	-	-
15	TCGA-HR-A2OG-01A-11-A20N-20	TCGA-HR-A2OG	SKCM	Primary	[ 0. 1. 0. 0. 0. 0. 0. 0. 0. 0. 0. 0. 0. 0. 0. 0. 0.]	-	-	Q61R	-	-	-
16	TCGA-BF-AAP1-01A-21-A443-20	TCGA-BF-AAP1	SKCM	Primary	[ 0. 1. 0. 0. 0. 0. 0. 0. 0. 0. 0. 0. 0. 0. 0. 0. 0.]	-	-	-	-	-	-
17	TCGA-FR-A726-01A-21-A444-20	TCGA-FR-A726	SKCM	Primary	[ 1. 1. 0. 0. 0. 0. 0. 0. 0. 0. 0. 0. 0. 0. 0. 0. 0.]	-	-	-	-	-	-
18	TCGA-BF-AAOU-01A-21-A443-20	TCGA-BF-AAOU	SKCM	Primary	[ 0. 1. 0. 0. 0. 0. 0. 0. 0. 0. 0. 0. 0. 0. 0. 0. 0.]	-	-	-	-	-	-
19	TCGA-EB-A85J-01A-21-A443-20	TCGA-EB-A85J	SKCM	Primary	[ 0. 1. 0. 0. 1. 1. 0. 0. 0. 0. 0. 0. 0. 0. 0. 0. 0.]	-	-	-	Q61K	-	-
20	TCGA-ER-A2NF-01A-21-A20N-20	TCGA-ER-A2NF	SKCM	Primary	[ 0. 1. 0. 0. 0. -1. 0. 0. 0. 0. 0. 0. 0. 0. 0. 0. 0.]	-	-	-	-	-	-
21	TCGA-BF-A1PZ-01A-21-A20M-20	TCGA-BF-A1PZ	SKCM	Primary	[ 0. 1. 0. 0. 0. -1. 0. 0. 0. 0. 0. 0. 0. 0. 0. 0. 0.]	-	-	Q61R	-	-	-
22	TCGA-EB-A41B-01A-21-A444-20	TCGA-EB-A41B	SKCM	Primary	[ 0. 0. 0. 0. 0. 0. 0. 0. 1. 0. 0. 0. 0. 1. 0. 0. 0.]	-	-	-	-	-	-
23	TCGA-BF-AAOX-01A-21-A443-20	TCGA-BF-AAOX	SKCM	Primary	[ 0. 1. 0. 0. 0. 1. 0. 0. 0. 0. 0. 0. 0. 0. 0. 0. 0.]	-	Q61L	-	-	-	-
24	TCGA-BF-A5ES-01A-21-A443-20	TCGA-BF-A5ES	SKCM	Primary	[ 0. 0. 0. 0. -1. 0. 0. 0. 0. 0. 0. 0. 0. 0. 0. 0. 0.]	-	-	-	-	L576P	-
25	TCGA-EB-A5SF-01A-21-A444-20	TCGA-EB-A5SF	SKCM	Primary	[ 0. 1. 0. 0. 0. 1. 0. -1. 0. 0. 0. 0. 0. 0. 0. 0. 0.]	-	-	-	-	-	-
26	TCGA-BF-AAP8-01A-21-A443-20	TCGA-BF-AAP8	SKCM	Primary	[ 0. 1. 0. 0. 0. 0. 0. 0. 0. 0. 0. 0. 0. 0. 0. 0. 0.]	-	-	-	-	-	-
27	TCGA-XV-AAZY-01A-21-A444-20	TCGA-XV-AAZY	SKCM	Primary	[ 0. 1. 0. 0. 0. 0. 0. 0. -1. 0. 0. 0. 0. 0. 0. 0. 0.]	-	-	Q61R	-	-	-
28	TCGA-GN-A26C-01A-21-A20N-20	TCGA-GN-A26C	SKCM	Primary	[ 0. 1. 0. 0. 0. 0. 0. 0. 0. 0. 0. 0. 0. 0. 0. 0. 0.]	-	-	-	-	-	-
29	TCGA-BF-A5EP-01A-21-A443-20	TCGA-BF-A5EP	SKCM	Primary	[ 1. 0. 0. 0. -1. 0. 0. 0. 0. 0. 0. 0. 0. 0. 0. 0. 0.]	-	-	-	-	-	-
30	TCGA-EB-A82B-01A-21-A443-20	TCGA-EB-A82B	SKCM	Primary	[ 0. 1. 0. 0. 0. 0. 0. 0. 0. 0. 0. 0. 0. 0. 0. 0. 0.]	-	-	-	-	-	-
31	TCGA-BF-A1PX-01A-41-A20M-20	TCGA-BF-A1PX	SKCM	Primary	[ 0. 1. 0. 0. 0. -1. -1. 0. 0. 0. 0. 0. 0. 0. 0. 0. 0.]	-	-	-	-	-	-
32	TCGA-ER-A196-01A-21-A20N-20	TCGA-ER-A196	SKCM	Primary	[ 0. 1. 0. 0. 0. 0. 0. 0. 0. 0. 0. 0. 0. 0. 0. 0. 0.]	-	-	-	-	-	-
33	TCGA-ER-A19T-01A-21-A215-20	TCGA-ER-A19T	SKCM	Primary	[ 1. 1. 0. 0. 0. 0. 0. 0. 0. 0. 0. 0. 0. 0. 0. 0. 0.]	-	-	-	-	-	-
34	TCGA-D9-A4Z3-01A-21-A443-20	TCGA-D9-A4Z3	SKCM	Primary	[ 0. 1. 0. 0. 0. 0. 0. 0. 0. 0. 0. 0. 0. 0. 0. 0. 0.]	-	-	Q61R	-	-	-
35	TCGA-EB-A42Y-01A-21-A443-20	TCGA-EB-A42Y	SKCM	Primary	[ 0. 1. 0. 0. 0. 0. 0. 0. 0. 0. 0. 0. 0. 0. 0. 0. 0.]	-	-	-	-	-	K642E
36	TCGA-EB-A57M-01A-41-A444-20	TCGA-EB-A57M	SKCM	Primary	[ 0. 1. 0. -1. 0. 0. 0. 0. 0. 0. 0. 0. 0. 0. 0. 0. 0.]	-	-	-	-	-	K642E
37	TCGA-EE-A29N-06A-21-A20M-20	TCGA-EE-A29N	SKCM	Primary	[ 0. 1. 0. 0. 0. 0. 0. 0. 0. 0. 0. 0. 0. 0. 0. 0. 0.]	-	-	-	-	-	-
38	TCGA-D3-A51K-06A-21-A443-20	TCGA-D3-A51K	SKCM	Primary	[ 1. 0. 0. 0. -1. 0. 0. 0. 0. 0. 0. -1. 0. 0. 0. 0. 0.]	-	-	-	-	L576P	-
39	TCGA-FS-A1Z0-06A-21-A20N-20	TCGA-FS-A1Z0	SKCM	Primary	[ 0. 0. 0. 0. -1. 0. 0. 0. 0. 0. 0. 0. 0. 0. 0. 0. 0.]	-	-	Q61R	-	-	-
40	TCGA-GN-A261-06A-21-A20N-20	TCGA-GN-A261	SKCM	Primary	[ 0. 1. 0. -1. 0. 0. 0. 0. 0. 0. 0. 0. 0. 0. 0. 0. 0.]	-	-	-	-	-	-
41	TCGA-EE-A29L-06A-21-A20M-20	TCGA-EE-A29L	SKCM	Primary	[ 0. 1. 0. 0. 0. 0. 0. 0. 0. 0. 0. 0. 0. 0. 0. 0. 0.]	-	Q61L	-	-	-	-
42	TCGA-FS-A1Z3-06A-21-A20N-20	TCGA-FS-A1Z3	SKCM	Primary	[ 0. 1. 0. 0. 0. 0. 0. 0. 0. 0. 0. 0. 0. 0. 0. 0. 0.]	-	-	-	-	-	-
43	TCGA-DA-A1IB-06A-21-A20M-20	TCGA-DA-A1IB	SKCM	Primary	[ 0. 1. 0. 0. 0. -1. 0. 0. 0. 0. 0. 0. 0. 0. 0. 0. 0.]	-	-	-	-	-	-
44	TCGA-W3-AA1O-06A-21-A444-20	TCGA-W3-AA1O	SKCM	Primary	[ 0. 1. 0. 0. 0. 0. 0. 0. 0. 0. 0. 0. 0. 0. 0. 0. 0.]	-	-	-	-	-	-
45	TCGA-D9-A6EA-06A-21-A444-20	TCGA-D9-A6EA	SKCM	Primary	[ 0. 0. 0. 0. 0. 0. 0. 0. 0. 0. 0. -1. 0. 0. 0. 0. 0.]	-	-	Q61R	-	-	-
46	TCGA-EE-A2GU-06A-21-A20M-20	TCGA-EE-A2GU	SKCM	Primary	[ 0. 1. 0. 0. 0. 0. 0. 0. 0. 0. 0. 0. 0. 0. 0. 0. 0.]	-	-	-	Q61K	-	-
47	TCGA-ER-A195-06A-21-A20N-20	TCGA-ER-A195	SKCM	Primary	[ 0. 1. 0. 0. -1. 0. 0. 0. 0. 0. 0. 0. -1. 0. 0. 0. 0.]	-	-	-	Q61K	-	-
48	TCGA-RP-A694-06A-21-A444-20	TCGA-RP-A694	SKCM	Primary	[ 0. 1. 0. 0. 0. 0. 0. 0. 0. 0. 0. 0. 0. 0. 0. 0. 0.]	-	-	-	Q61K	-	-
49	TCGA-ER-A1A1-06A-21-A20N-20	TCGA-ER-A1A1	SKCM	Primary	[ 0. 1. 0. 0. 0. 0. 0. 0. 0. 0. 0. 0. 0. 0. 0. 0. 0.]	-	-	-	-	-	-
50	TCGA-D3-A2JC-06A-21-A20M-20	TCGA-D3-A2JC	SKCM	Primary	[ 0. 1. 0. 0. 0. 0. 0. 0. 0. 0. 0. 0. 0. 0. 0. 0. 0.]	-	-	-	-	-	-
51	TCGA-D3-A3MV-06A-21-A241-20	TCGA-D3-A3MV	SKCM	Primary	[ 0. 1. 0. 0. 0. 0. 0. 0. 0. 0. 0. 0. 0. 0. 0. 0. 0.]	-	-	Q61R	-	-	-
52	TCGA-GN-A268-06A-21-A20N-20	TCGA-GN-A268	SKCM	Primary	[ 0. 1. 0. 0. 0. 0. 0. 0. 0. 0. 0. 0. 0. 0. 0. 0. 0.]	-	-	-	Q61K	-	-
53	TCGA-D3-A1QA-06A-21-A20M-20	TCGA-D3-A1QA	SKCM	Primary	[ 0. 1. 0. 0. 0. 0. 0. 0. 0. 0. 0. 0. 0. 0. 0. 0. 0.]	-	-	-	-	-	-
54	TCGA-FR-A8YC-06A-21-A444-20	TCGA-FR-A8YC	SKCM	Primary	[ 1. 1. 0. 0. -1. 0. 0. 0. 1. 0. 0. 0. 0. 0. 0. 0. 0.]	-	-	-	-	-	-
55	TCGA-EE-A29V-06A-21-A20M-20	TCGA-EE-A29V	SKCM	Primary	[ 0. 1. 0. 0. 0. 0. 0. 0. 0. 0. 0. 0. 0. 0. 0. 0. 0.]	-	-	-	-	-	-
56	TCGA-DA-A1IA-06A-21-A20M-20	TCGA-DA-A1IA	SKCM	Primary	[ 1. 0. 1. -1. -1. 0. 0. 0. 0. 0. 0. 0. 0. 0. 0. 0. 0.]	-	-	-	-	-	-
57	TCGA-D9-A4Z6-06A-21-A443-20	TCGA-D9-A4Z6	SKCM	Primary	[ 0. 1. 1. 0. 0. -1. 0. 0. 0. 0. 0. 0. 0. 0. 0. 0. 0.]	-	-	-	-	-	-
58	TCGA-FS-A1Z4-06A-21-A20N-20	TCGA-FS-A1Z4	SKCM	Primary	[ 0. 1. 0. 0. 0. 0. 0. 0. 0. 0. 0. 0. 0. 0. 0. 0. 0.]	-	-	-	-	-	-
59	TCGA-ER-A19F-06A-21-A20N-20	TCGA-ER-A19F	SKCM	Primary	[ 0. 1. 0. 0. 0. 0. 0. 0. 0. 0. 0. 0. 0. 0. 0. 0. 0.]	-	-	-	-	-	-
60	TCGA-D9-A3Z1-06A-21-A241-20	TCGA-D9-A3Z1	SKCM	Primary	[ 0. 1. 0. 1. 0. 0. 0. -1. 0. 0. 0. 0. 0. 0. 0. 0. 0.]	-	-	Q61R	-	-	-
61	TCGA-ER-A19L-06A-21-A20N-20	TCGA-ER-A19L	SKCM	Primary	[ 0. 1. 0. 0. 0. -1. 0. 0. 0. 0. 0. 0. 0. 0. 0. 0. 0.]	-	-	-	-	-	-
62	TCGA-EE-A3JH-06A-21-A241-20	TCGA-EE-A3JH	SKCM	Primary	[ 1. 0. 1. -1. 0. 0. 0. 0. 1. 1. 0. 0. 0. 0. 0. 0. 0.]	-	-	-	-	-	-
63	TCGA-GN-A267-06A-11-A20N-20	TCGA-GN-A267	SKCM	Primary	[ 1. 1. 0. -1. -1. 0. 0. 0. 0. 0. 0. 0. 0. 0. 0. 0. 0.]	-	-	-	Q61K	-	-
64	TCGA-EE-A2GK-06A-21-A20M-20	TCGA-EE-A2GK	SKCM	Primary	[ 0. 1. 0. 0. 0. 0. 0. -1. 0. 0. 0. 0. 0. 0. 0. 0. 0.]	-	-	-	-	-	-
65	TCGA-EE-A2MN-06A-21-A20N-20	TCGA-EE-A2MN	SKCM	Primary	[ 0. 0. 0. 0. 0. 0. 0. 0. 0. 0. 0. 0. 0. 0. 0. 0. 0.]	-	-	-	Q61K	-	-
66	TCGA-ER-A42H-01A-21-A443-20	TCGA-ER-A42H	SKCM	Metastatic	[ 0. 1. 0. 0. 0. 0. 0. 0. 0. 0. 0. 0. 0. 0. 0. 0. 0.]	-	-	-	-	-	K642E
67	TCGA-EB-A3XC-01A-21-A241-20	TCGA-EB-A3XC	SKCM	Metastatic	[ 0. 1. 0. 0. 0. 0. 0. -1. 0. 0. 0. 0. 0. 0. 0. 0. 0.]	-	-	-	-	-	-
68	TCGA-BF-AAP4-01A-21-A443-20	TCGA-BF-AAP4	SKCM	Metastatic	[ 0. 1. 0. 0. 0. 0. 0. 0. 0. 0. 0. 0. 0. 0. 0. 0. 0.]	-	-	-	-	-	-
69	TCGA-EB-A24D-01A-21-A20M-20	TCGA-EB-A24D	SKCM	Metastatic	[ 0. 1. 0. 0. 0. 0. 1. 0. 0. 0. 0. 0. 0. 0. 0. 0. 0.]	-	-	-	-	-	-
70	TCGA-ER-A194-01A-31-A20N-20	TCGA-ER-A194	SKCM	Metastatic	[ 0. 1. 0. 0. 0. 0. 0. 1. 0. 0. 0. 0. 0. 0. 0. 0. 0.]	-	-	-	-	-	-
71	TCGA-EB-A1NK-01A-21-A20M-20	TCGA-EB-A1NK	SKCM	Metastatic	[ 1. 1. 0. 0. 0. 0. 0. 0. 0. 0. 0. 0. 0. 0. 0. 0. 0.]	-	-	Q61R	-	-	-
72	TCGA-D9-A4Z5-01A-21-A443-20	TCGA-D9-A4Z5	SKCM	Metastatic	[ 0. 1. 0. 0. 0. -1. 0. 0. 0. 0. 0. 0. 0. 0. 1. 0. 0.]	-	-	-	-	-	-
73	TCGA-EB-A4OZ-01A-21-A443-20	TCGA-EB-A4OZ	SKCM	Metastatic	[ 0. 1. 0. 0. 0. 0. 0. 0. 0. 0. 0. 0. 0. 0. 0. 0. 0.]	-	-	-	-	-	-
74	TCGA-EB-A82C-01A-21-A443-20	TCGA-EB-A82C	SKCM	Metastatic	[ 0. 1. 0. -1. 0. 0. 0. 0. 0. 0. 0. 0. 0. 0. 0. 0. 0.]	-	-	-	-	-	-
75	TCGA-DA-A960-01A-21-A444-20	TCGA-DA-A960	SKCM	Metastatic	[ 0. 1. 0. 0. 0. 0. 0. 0. 0. 0. 0. 0. 0. 0. 0. 0. 0.]	-	Q61L	-	-	-	-
76	TCGA-FR-A3R1-01A-21-A241-20	TCGA-FR-A3R1	SKCM	Metastatic	[ 0. 1. 0. 0. 0. 1. 0. 0. 0. 0. 0. 1. 0. 0. 0. 0. 0.]	-	-	-	-	-	-
77	TCGA-GN-A8LN-01A-21-A443-20	TCGA-GN-A8LN	SKCM	Metastatic	[ 0. 1. 0. 0. 0. 0. 0. 0. 0. 0. 0. 0. 0. 0. 0. 0. 0.]	-	-	Q61R	-	-	-
78	TCGA-XV-A9W2-01A-21-A444-20	TCGA-XV-A9W2	SKCM	Metastatic	[ 0. 1. 0. 0. 0. 0. 0. 0. 0. 0. 0. 0. 0. 0. 0. 0. 0.]	-	-	-	-	-	-
79	TCGA-EB-A97M-01A-21-A443-20	TCGA-EB-A97M	SKCM	Metastatic	[ 0. 1. -1. 1. 0. 0. 0. -1. 0. 0. 0. 0. 0. 0. 0. 0. 0.]	-	-	-	-	-	-
80	TCGA-EB-A4IQ-01A-21-A443-20	TCGA-EB-A4IQ	SKCM	Metastatic	[ 0. 1. 0. 0. 0. 0. 0. 0. 0. 0. 0. 0. 0. 0. 0. 0. 0.]	-	-	-	-	-	-
81	TCGA-DA-A95X-06A-21-A443-20	TCGA-DA-A95X	SKCM	Metastatic	[ 0. 1. 0. 0. 0. 0. 0. 0. 0. 0. 0. 0. 0. 0. 0. 0. 0.]	-	Q61L	-	-	-	-
82	TCGA-EE-A29B-06A-31-A20M-20	TCGA-EE-A29B	SKCM	Metastatic	[ 1. 0. 0. 0. 0. 0. 0. 0. 0. 0. 0. 0. 0. 0. 0. 0. 0.]	-	-	-	-	-	-
83	TCGA-D3-A8GC-06A-21-A443-20	TCGA-D3-A8GC	SKCM	Metastatic	[ 0. 1. 0. 0. 0. 0. 0. 0. 0. 0. 0. 0. 0. 0. 0. 0. 0.]	-	-	-	-	-	-
84	TCGA-FS-A4FC-06A-21-A443-20	TCGA-FS-A4FC	SKCM	Metastatic	[ 0. 1. 0. 0. 0. 1. 0. 0. 0. 0. 0. 0. 0. 0. 0. 0. 0.]	-	-	-	-	-	-
85	TCGA-WE-A8K1-06A-11-A443-20	TCGA-WE-A8K1	SKCM	Metastatic	[ 0. 1. 0. 0. 0. 0. 0. 0. 0. 0. 0. 0. 0. 0. 0. 0. 0.]	-	-	Q61R	-	-	-
86	TCGA-D3-A8GP-06A-21-A443-20	TCGA-D3-A8GP	SKCM	Metastatic	[ 1. 1. 0. 0. -1. 1. 0. 0. -1. 0. 0. 0. 0. 0. 0. 0. 0.]	-	-	-	-	-	-
87	TCGA-ER-A19D-06A-21-A20N-20	TCGA-ER-A19D	SKCM	Metastatic	[ 0. 1. 0. 0. 0. 1. 0. 1. 0. 0. 0. 0. 0. 0. 0. 0. 0.]	-	-	-	Q61K	-	-
88	TCGA-DA-A3F2-06A-21-A241-20	TCGA-DA-A3F2	SKCM	Metastatic	[ 0. 1. 0. 0. 0. 0. 0. 0. 0. 0. 0. 0. 0. 0. 0. 0. 0.]	-	-	-	-	-	-
89	TCGA-FR-A3YO-06A-21-A241-20	TCGA-FR-A3YO	SKCM	Metastatic	[ 0. 1. 0. 0. 0. 0. 0. 0. 0. 0. 0. 0. 0. 0. 0. 0. 0.]	-	-	-	-	-	-
90	TCGA-EE-A3J7-06A-21-A241-20	TCGA-EE-A3J7	SKCM	Metastatic	[ 0. 1. 0. 0. 0. 0. 0. 1. 0. 0. 0. 0. 0. 0. 0. 0. 0.]	-	-	Q61R	-	-	-
91	TCGA-GF-A3OT-06A-11-A241-20	TCGA-GF-A3OT	SKCM	Metastatic	[ 0. 1. 0. 0. 0. 0. 0. 0. 0. 0. 0. 0. 0. 0. 0. 0. 0.]	-	-	-	Q61K	-	-
92	TCGA-WE-A8JZ-06A-21-A443-20	TCGA-WE-A8JZ	SKCM	Metastatic	[ 0. 1. 0. 0. 0. 0. 0. 0. 0. 0. 0. 0. 0. 0. 0. 0. 0.]	-	-	Q61R	Q61K	-	-
93	TCGA-D3-A51T-06A-21-A443-20	TCGA-D3-A51T	SKCM	Metastatic	[ 0. 1. 0. 0. 0. 0. 0. 0. 0. 0. 0. 0. 0. 0. 0. 0. 0.]	-	-	-	-	-	-
94	TCGA-YD-A89C-06A-21-A443-20	TCGA-YD-A89C	SKCM	Metastatic	[ 0. 1. 0. 0. 0. 1. 0. 0. 0. 0. 0. 0. 0. 0. 0. 0. 0.]	-	-	Q61R	-	-	-
95	TCGA-DA-A3F3-06A-21-A241-20	TCGA-DA-A3F3	SKCM	Metastatic	[ 0. 1. 0. 0. 0. 0. 0. 0. 0. 0. 0. 0. 0. 0. 0. 0. 0.]	-	-	Q61R	Q61K	-	-
96	TCGA-EB-A44Q-06A-21-A443-20	TCGA-EB-A44Q	SKCM	Metastatic	[ 0. 1. 0. 0. 0. 0. 0. 0. 0. 0. 0. 0. 0. 0. 0. 0. 0.]	-	Q61L	-	-	-	-
97	TCGA-EB-A44R-06A-51-A443-20	TCGA-EB-A44R	SKCM	Metastatic	[ 0. 1. 0. 0. 0. 0. 0. 0. 0. 0. 0. 0. 0. 0. 0. 0. 0.]	-	-	-	-	-	-
98	TCGA-EE-A2MJ-06A-21-A20N-20	TCGA-EE-A2MJ	SKCM	Metastatic	[ 0. 1. 0. 0. 0. 0. 0. 0. 0. 0. 0. 0. 0. 0. 0. 0. 0.]	-	-	-	-	-	-
99	TCGA-EE-A180-06A-21-A241-20	TCGA-EE-A180	SKCM	Metastatic	[ 0. 1. 0. 0. 0. 0. 0. 0. 0. 0. 0. 0. 0. 0. 0. 0. 0.]	-	-	-	-	-	-
100	TCGA-EB-A6L9-06A-21-A444-20	TCGA-EB-A6L9	SKCM	Metastatic	[ 0. 1. 0. 0. 0. 0. 0. 0. 0. 0. 0. 0. 0. 0. 0. 0. 0.]	-	-	-	-	-	-
101	TCGA-EE-A2GP-06A-21-A20M-20	TCGA-EE-A2GP	SKCM	Metastatic	[ 0. 1. 0. 0. 1. 0. 0. 0. 0. 0. 0. 0. 0. 0. 0. 0. 0.]	-	-	Q61R	-	-	-
102	TCGA-EE-A2GC-06A-21-A20M-20	TCGA-EE-A2GC	SKCM	Metastatic	[ 1. 1. 0. -1. 0. 0. 0. 0. 0. 0. 0. 0. 0. 0. 0. 0. 0.]	-	-	-	-	-	-
103	TCGA-DA-A1HV-06A-41-A20M-20	TCGA-DA-A1HV	SKCM	Metastatic	[ 0. 1. 1. -1. 0. 0. -1. 0. 0. 0. 0. 0. 0. 0. 0. 0. 0.]	-	-	-	Q61K	-	-
104	TCGA-ER-A19A-06A-11-A20N-20	TCGA-ER-A19A	SKCM	Metastatic	[ 0. 1. 0. 0. 0. 0. 0. 0. 0. 0. 0. 0. 0. 0. 0. 0. 0.]	-	-	-	-	-	-
105	TCGA-EB-A5SG-06A-21-A444-20	TCGA-EB-A5SG	SKCM	Metastatic	[ 0. 1. -1. 0. 0. 0. 0. 0. 0. 0. 0. 0. 0. 0. 0. 0. 0.]	-	-	Q61R	-	-	-
106	TCGA-EE-A185-06A-21-A20M-20	TCGA-EE-A185	SKCM	Metastatic	[ 0. 1. 0. 0. 0. 1. 0. 0. 0. 0. 0. 0. 0. 0. 0. 0. 0.]	-	-	-	Q61K	-	-
107	TCGA-EE-A3AA-06A-21-A20N-20	TCGA-EE-A3AA	SKCM	Metastatic	[ 0. 1. 0. 0. 0. 0. 0. 0. 0. 0. 0. 0. 0. 0. 0. 0. 0.]	-	-	-	-	-	-
108	TCGA-FS-A1ZK-06A-21-A20N-20	TCGA-FS-A1ZK	SKCM	Metastatic	[ 0. 1. 0. 0. 0. 0. 0. 0. 0. 0. 0. 0. 0. 0. 0. 0. 0.]	-	-	-	-	-	-
109	TCGA-D3-A51E-06A-21-A443-20	TCGA-D3-A51E	SKCM	Metastatic	[ 1. 1. 0. 0. 0. 0. 1. 0. 0. 0. 0. 0. 0. 0. 0. 0. 0.]	-	-	Q61R	-	-	-
110	TCGA-EB-A5VV-06A-21-A443-20	TCGA-EB-A5VV	SKCM	Metastatic	[ 0. 1. 0. 0. 0. 0. 0. 0. 0. 0. 0. 0. 0. 0. 0. 0. 0.]	-	-	-	-	-	-
111	TCGA-D3-A1Q8-06A-21-A20M-20	TCGA-D3-A1Q8	SKCM	Metastatic	[ 0. 1. 0. 0. 0. 0. 0. -1. 0. 0. 0. 0. 0. 0. 0. 0. 0.]	-	-	-	Q61K	-	-
112	TCGA-D3-A2JO-06A-21-A20M-20	TCGA-D3-A2JO	SKCM	Metastatic	[ 1. 1. 0. -1. 0. 0. 0. 0. 0. 0. 0. 0. 0. 0. 0. 0. 0.]	-	-	-	Q61K	-	-
113	TCGA-EE-A3AC-06A-21-A20N-20	TCGA-EE-A3AC	SKCM	Metastatic	[ 0. 1. 0. 0. 0. 0. 0. 0. 0. 0. 0. 0. 0. 0. 0. 0. 0.]	-	-	-	Q61K	-	-
114	TCGA-GN-A8LL-06A-31-A443-20	TCGA-GN-A8LL	SKCM	Metastatic	[ 0. 1. 0. 0. 0. 0. 0. 0. 0. 0. 0. 0. 0. 0. 0. 0. 0.]	-	-	-	-	-	-
115	TCGA-EE-A2MR-06A-21-A20N-20	TCGA-EE-A2MR	SKCM	Metastatic	[ 0. 1. 0. 0. 0. 1. 0. 0. 0. 0. 0. 0. 0. 0. 0. 0. 0.]	-	-	-	-	-	-
116	TCGA-DA-A1IC-06A-21-A20M-20	TCGA-DA-A1IC	SKCM	Metastatic	[ 0. 1. 0. 0. 0. 0. 0. 0. 0. 0. 0. 0. 0. 0. 0. -1. 0.]	-	-	-	-	-	-
117	TCGA-FS-A1ZA-06A-21-A20N-20	TCGA-FS-A1ZA	SKCM	Metastatic	[ 0. 1. 0. 0. 0. 0. 0. 0. 0. 0. 0. 0. 0. 0. 0. 0. 0.]	-	-	-	-	-	-
118	TCGA-FS-A1ZG-06A-21-A20N-20	TCGA-FS-A1ZG	SKCM	Metastatic	[ 0. 1. 0. 0. 0. 1. 0. 0. 0. 0. 0. 0. 0. 0. 0. 0. 0.]	-	-	-	-	-	-
119	TCGA-EB-A5KH-06A-21-A443-20	TCGA-EB-A5KH	SKCM	Metastatic	[ 0. 1. 0. 0. 0. 0. 0. 1. 0. 0. -1. 0. 0. 0. 0. 0. 0.]	-	-	-	-	-	K642E
120	TCGA-EE-A184-06A-21-A20M-20	TCGA-EE-A184	SKCM	Metastatic	[ 0. 1. 0. 0. 0. 0. 0. 0. 0. 0. 0. 0. 0. 0. 0. 0. 0.]	-	-	-	-	-	-
121	TCGA-FW-A3I3-06A-21-A241-20	TCGA-FW-A3I3	SKCM	Metastatic	[ 0. 1. 0. 0. 0. 0. 0. 0. 0. 0. 0. 0. 0. 0. 0. 0. 0.]	-	-	-	-	-	-
122	TCGA-EE-A2A2-06A-21-A20M-20	TCGA-EE-A2A2	SKCM	Metastatic	[ 0. 1. 0. 0. 0. 0. 0. 0. 0. 0. 0. 0. 0. 0. 0. 0. 0.]	-	Q61L	-	-	-	-
123	TCGA-FS-A1ZT-06A-21-A20N-20	TCGA-FS-A1ZT	SKCM	Metastatic	[ 1. 0. 0. 0. 0. 0. 0. 0. 0. 0. 0. 0. 0. 0. 0. 0. 0.]	-	-	Q61R	-	-	-
124	TCGA-ER-A3ET-06A-21-A241-20	TCGA-ER-A3ET	SKCM	Metastatic	[ 0. 1. 0. 0. 1. 1. 0. -1. 0. 0. 0. 0. 0. 0. 0. 0. 0.]	-	-	-	-	-	-
125	TCGA-EE-A2MI-06A-21-A20N-20	TCGA-EE-A2MI	SKCM	Metastatic	[ 0. 1. 0. 0. 0. 0. 0. 1. 0. 0. 0. 0. 0. 0. 0. 0. 0.]	-	-	-	-	-	-
126	TCGA-EE-A3JA-06A-21-A241-20	TCGA-EE-A3JA	SKCM	Metastatic	[ 0. 1. 0. 0. 1. 1. 0. -1. 0. 0. 0. 0. 0. 0. 0. 0. 0.]	-	-	Q61R	-	-	-
127	TCGA-EE-A2ML-06A-21-A20N-20	TCGA-EE-A2ML	SKCM	Metastatic	[ 1. 1. 1. -1. 0. 0. 0. 0. 0. 0. 0. 0. 0. 0. 0. 0. 0.]	-	-	Q61R	-	-	-
128	TCGA-EE-A2MD-06A-21-A20N-20	TCGA-EE-A2MD	SKCM	Metastatic	[ 0. 1. 0. 0. 0. 0. 0. 0. 0. 0. 0. 0. 0. 0. 0. 0. 0.]	-	-	Q61R	-	-	-
129	TCGA-EE-A2MS-06A-21-A20N-20	TCGA-EE-A2MS	SKCM	Metastatic	[ 0. 1. 0. 0. 0. 0. 0. -1. 0. 0. 0. 0. 0. 0. 0. 0. 0.]	-	-	-	-	-	-
130	TCGA-D3-A8GM-06A-21-A443-20	TCGA-D3-A8GM	SKCM	Metastatic	[ 0. 1. 0. 0. 0. 0. 0. 0. 0. 0. 0. 0. 0. 0. 0. 0. 0.]	-	-	-	-	-	-
131	TCGA-RP-A6K9-06A-51-A444-20	TCGA-RP-A6K9	SKCM	Metastatic	[ 1. 1. 0. -1. -1. 0. 0. 0. 0. 0. 0. 0. 0. 0. 0. 0. 0.]	-	-	-	-	-	-
132	TCGA-D3-A2J8-06A-21-A20M-20	TCGA-D3-A2J8	SKCM	Metastatic	[ 0. 1. 0. 0. 0. 1. 0. -1. 0. 0. 0. 0. 0. 0. 0. 0. 0.]	-	Q61L	-	-	-	-
133	TCGA-WE-A8ZY-06A-21-A444-20	TCGA-WE-A8ZY	SKCM	Metastatic	[ 0. 1. 0. 0. 0. 1. 0. 0. -1. 0. 0. 0. 0. 0. 0. 0. 0.]	-	-	Q61R	-	-	-
134	TCGA-ER-A197-06A-41-A20N-20	TCGA-ER-A197	SKCM	Metastatic	[ 0. 1. 0. 0. 0. 0. 0. 0. 0. 0. 0. 0. 0. 0. 0. 0. 0.]	-	-	-	-	-	-
135	TCGA-ER-A19N-06A-21-A20N-20	TCGA-ER-A19N	SKCM	Metastatic	[ 1. 1. 0. 0. 0. 0. 0. 1. 0. 0. 0. 0. 0. 0. 0. 0. 0.]	-	-	-	-	-	-
136	TCGA-EE-A2MT-06A-21-A20N-20	TCGA-EE-A2MT	SKCM	Metastatic	[ 0. 1. 0. 0. 0. 0. 0. 0. 0. 0. 0. 0. 0. 0. 0. 0. 0.]	-	-	-	-	-	-
137	TCGA-ER-A193-06A-21-A20N-20	TCGA-ER-A193	SKCM	Metastatic	[ 0. 1. 0. 0. 0. 0. 0. 0. 0. 0. 0. 0. 0. 0. 0. 0. 0.]	-	-	-	-	-	-
138	TCGA-FS-A1YW-06A-21-A20N-20	TCGA-FS-A1YW	SKCM	Metastatic	[ 0. 0. 0. 0. -1. 1. 1. 0. 0. 0. 0. 0. 0. 0. 0. 0. 0.]	-	-	-	Q61K	-	-
139	TCGA-WE-AAA3-06A-21-A444-20	TCGA-WE-AAA3	SKCM	Metastatic	[ 0. 1. 0. 0. 0. 0. 0. 0. 0. 0. 0. 0. 0. 0. 0. 0. 0.]	-	-	Q61R	-	-	-
140	TCGA-EE-A17X-06A-21-A20M-20	TCGA-EE-A17X	SKCM	Metastatic	[ 0. 1. 0. 0. 0. 0. 0. 0. 0. 0. 0. 0. 0. 0. 0. 0. 0.]	-	-	-	Q61K	-	-
141	TCGA-FR-A69P-06A-11-A444-20	TCGA-FR-A69P	SKCM	Metastatic	[ 0. 1. 0. 0. 0. 0. 0. 0. 0. 0. 0. 0. 0. 0. 0. 0. 0.]	-	-	Q61R	-	-	-
142	TCGA-DA-A95Y-06A-21-A444-20	TCGA-DA-A95Y	SKCM	Metastatic	[ 0. 1. 0. 0. 0. 0. 0. 0. 0. 0. 0. 0. 0. 0. 0. 0. 0.]	-	-	-	-	-	-
143	TCGA-WE-AA9Y-06A-21-A444-20	TCGA-WE-AA9Y	SKCM	Metastatic	[ 0. 1. 0. 0. 0. 0. 0. 0. 0. 0. 0. 0. 0. 0. 0. 0. 0.]	-	-	-	-	-	-
144	TCGA-EE-A182-06A-21-A20M-20	TCGA-EE-A182	SKCM	Metastatic	[ 0. 1. 0. 0. 1. 0. 0. 0. 0. 0. 0. 0. 0. 0. 0. 0. 0.]	-	-	-	-	-	-
145	TCGA-D3-A1Q1-06A-11-A20M-20	TCGA-D3-A1Q1	SKCM	Metastatic	[ 1. 1. 1. -1. 0. 0. 0. 0. 0. 0. 0. 0. 0. 0. 0. 0. 1.]	-	-	-	-	-	-
146	TCGA-YG-AA3P-06A-21-A444-20	TCGA-YG-AA3P	SKCM	Metastatic	[ 0. 1. 0. 0. 0. 0. 0. 0. 0. 0. 0. 0. 0. 0. 0. 0. 0.]	-	-	-	-	-	K642E
147	TCGA-EE-A3AE-06A-21-A20N-20	TCGA-EE-A3AE	SKCM	Metastatic	[ 0. 1. -1. 0. 0. 0. 0. 0. 0. 0. 0. 0. 0. 0. 0. 0. 0.]	-	-	-	-	-	-
148	TCGA-RP-A695-06A-21-A444-20	TCGA-RP-A695	SKCM	Metastatic	[ 1. 1. 0. 0. 0. 0. 0. -1. 0. 0. 0. 0. 0. 0. 0. 0. 0.]	-	-	Q61R	-	-	-
149	TCGA-EE-A2MM-06A-21-A20N-20	TCGA-EE-A2MM	SKCM	Metastatic	[ 0. 1. 0. 0. 0. 0. 0. 0. 0. 0. 0. 0. 0. 0. 0. 0. 0.]	-	-	-	-	-	-
150	TCGA-EE-A2GI-06A-21-A20M-20	TCGA-EE-A2GI	SKCM	Metastatic	[ 0. 1. 0. 0. 0. 0. 0. 0. 0. 0. 0. 0. 0. 0. 0. 0. 0.]	-	-	-	-	-	-
151	TCGA-ER-A2NH-06A-21-A20N-20	TCGA-ER-A2NH	SKCM	Metastatic	[ 0. 1. 0. 0. 0. 0. 0. 0. 0. 0. 0. 0. 0. 0. 0. 0. 0.]	-	-	Q61R	-	-	-
152	TCGA-D3-A8GR-06A-21-A443-20	TCGA-D3-A8GR	SKCM	Metastatic	[ 0. 1. 0. 0. 0. 0. 0. 0. 0. 0. 0. 0. 0. 0. 0. 0. 0.]	-	-	-	Q61K	-	-
153	TCGA-D3-A2J6-06A-21-A20M-20	TCGA-D3-A2J6	SKCM	Metastatic	[ 0. 1. 0. 0. 0. 1. 0. 0. 0. 0. 0. 0. 0. 0. 0. 0. 0.]	-	-	-	-	-	-
154	TCGA-GN-A26D-06A-21-A20N-20	TCGA-GN-A26D	SKCM	Metastatic	[ 0. 1. 0. 0. 0. 0. 0. 0. 0. 0. 0. 0. 0. 0. 0. 0. 0.]	-	-	-	-	-	-
155	TCGA-EE-A181-06A-21-A20M-20	TCGA-EE-A181	SKCM	Metastatic	[ 0. 1. 0. 0. 0. 0. 0. -1. 0. 0. 0. 0. 0. 0. 0. 0. 0.]	-	-	-	-	-	-
156	TCGA-3N-A9WC-06A-21-A444-20	TCGA-3N-A9WC	SKCM	Metastatic	[ 0. 1. 0. 0. 0. -1. 0. 0. 0. 0. 0. 0. 0. 0. 0. 0. 0.]	-	Q61L	-	-	-	-
157	TCGA-3N-A9WD-06A-21-A444-20	TCGA-3N-A9WD	SKCM	Metastatic	[ 0. 1. 0. 0. 0. 0. 0. 0. 0. 1. 0. 0. 0. 0. 0. 0. 0.]	-	Q61L	-	-	-	-
158	TCGA-ER-A199-06A-21-A20N-20	TCGA-ER-A199	SKCM	Metastatic	[ 0. 1. 0. 0. -1. 0. 1. 0. 0. 0. 0. 0. 0. 0. 0. 0. 0.]	-	-	Q61R	-	-	-
159	TCGA-EE-A2MC-06A-21-A20M-20	TCGA-EE-A2MC	SKCM	Metastatic	[ 1. 1. 0. 0. -1. 0. 0. 0. 0. 0. 0. 0. 0. 0. 0. 0. 0.]	-	-	Q61R	-	-	-
160	TCGA-D9-A1JW-06A-21-A20M-20	TCGA-D9-A1JW	SKCM	Metastatic	[ 0. 1. 0. 0. 0. 0. 0. 0. 0. 0. 0. 0. 0. 0. 0. 0. 0.]	-	-	-	-	-	-
161	TCGA-GN-A266-06A-21-A20N-20	TCGA-GN-A266	SKCM	Metastatic	[ 0. 1. 0. 0. 0. 0. 0. 1. 0. 0. 0. 0. 0. 0. 0. 0. 0.]	-	-	-	-	-	-
162	TCGA-EB-A5SH-06A-21-A444-20	TCGA-EB-A5SH	SKCM	Metastatic	[ 0. 1. 0. 0. 0. 0. 0. 0. 0. 0. 0. 0. 0. 0. 0. 0. 0.]	-	-	-	-	-	-
163	TCGA-GN-A264-06A-21-A20N-20	TCGA-GN-A264	SKCM	Metastatic	[ 0. 1. 0. 0. 0. 0. 0. 0. 0. 0. 0. 0. 0. 0. 0. 0. 0.]	-	-	-	-	-	-
164	TCGA-Z2-AA3S-06A-21-A444-20	TCGA-Z2-AA3S	SKCM	Metastatic	[ 0. 1. 0. 0. 0. 0. 0. 0. 0. 0. 0. 0. 0. 0. 0. 0. 0.]	-	-	-	-	-	-
165	TCGA-RP-A693-06A-21-A444-20	TCGA-RP-A693	SKCM	Metastatic	[ 0. 1. 0. 0. 1. 0. 0. 0. 0. 0. 0. 0. 0. 0. 0. 0. 0.]	-	-	-	-	-	-
166	TCGA-EE-A2A0-06A-21-A20M-20	TCGA-EE-A2A0	SKCM	Metastatic	[ 0. 1. 0. 0. 0. -1. 0. 0. 0. 0. 0. 0. 0. 0. 0. 0. 0.]	-	-	-	-	-	-
167	TCGA-ER-A2NE-06A-11-A20N-20	TCGA-ER-A2NE	SKCM	Metastatic	[ 1. 1. 0. 0. -1. 0. 0. 0. 0. 0. 0. 0. 0. 0. 0. 0. 0.]	-	-	-	Q61K	-	-
168	TCGA-GN-A4U9-06A-22-A444-20	TCGA-GN-A4U9	SKCM	Metastatic	[ 0. 1. 0. 0. 0. 0. 0. 0. 0. 0. 0. 0. 0. 0. 0. 0. 0.]	-	-	Q61R	-	-	-
169	TCGA-GN-A8LK-06A-21-A443-20	TCGA-GN-A8LK	SKCM	Metastatic	[ 0. 1. 0. 0. 0. 0. 0. 0. 0. 0. 0. 0. 0. 0. 0. 0. 0.]	-	-	-	-	-	-
170	TCGA-YG-AA3O-06A-21-A444-20	TCGA-YG-AA3O	SKCM	Metastatic	[ 0. 1. 0. 0. 0. 0. 0. 0. 0. 0. 0. 0. 0. 0. 0. 0. 0.]	-	-	-	-	-	-
171	TCGA-EE-A29R-06A-21-A20M-20	TCGA-EE-A29R	SKCM	Metastatic	[ 0. 1. 0. 0. 0. 0. 0. 0. 0. 0. 0. 0. 0. 0. 0. 0. 0.]	-	-	Q61R	-	-	-
172	TCGA-FS-A1ZU-06A-21-A20N-20	TCGA-FS-A1ZU	SKCM	Metastatic	[ 0. 1. 0. 0. 0. 0. 0. 0. 0. 0. 0. 0. 0. 0. 0. 0. 0.]	-	-	-	-	-	-
173	TCGA-D3-A51H-06A-21-A443-20	TCGA-D3-A51H	SKCM	Metastatic	[ 0. 1. 0. 0. 0. 0. 0. 0. 0. 0. 0. 0. 0. 0. 0. 0. 0.]	-	-	-	-	-	-
174	TCGA-FR-A8YD-06A-21-A444-20	TCGA-FR-A8YD	SKCM	Metastatic	[ 0. 1. 0. 0. 0. 1. 0. 0. 0. 1. 0. 0. 0. 0. 0. 0. 0.]	-	-	-	-	-	-
175	TCGA-D3-A8GE-06A-21-A443-20	TCGA-D3-A8GE	SKCM	Metastatic	[ 0. 1. 0. 1. -1. 0. 0. -1. 0. 0. 0. 0. 0. 0. 0. 0. 0.]	-	-	-	-	-	-
176	TCGA-DA-A95V-06A-21-A444-20	TCGA-DA-A95V	SKCM	Metastatic	[ 0. 1. 0. 0. 0. 0. 0. 0. 0. 0. 0. 0. 0. 0. 0. 0. 0.]	-	-	-	-	-	-
177	TCGA-FS-A1ZJ-06A-21-A20N-20	TCGA-FS-A1ZJ	SKCM	Metastatic	[ 0. 1. 0. 0. 0. 0. 0. 1. 0. 0. 0. 0. -1. 0. 0. 0. 0.]	-	-	-	-	-	-
178	TCGA-EB-A5UL-06A-21-A443-20	TCGA-EB-A5UL	SKCM	Metastatic	[ 0. 1. 0. 0. 0. 0. 0. 0. -1. 0. 0. 0. 0. 0. 0. 0. 0.]	-	-	-	Q61K	-	-
179	TCGA-FS-A1ZZ-06A-21-A20N-20	TCGA-FS-A1ZZ	SKCM	Metastatic	[ 0. 1. 0. 0. 0. 0. 0. 0. 0. 0. 0. 0. 0. 0. 0. 0. 0.]	-	-	-	-	-	-
180	TCGA-FR-A3YN-06A-21-A241-20	TCGA-FR-A3YN	SKCM	Metastatic	[ 0. 1. 0. 0. 0. 0. 0. 0. 0. 0. 0. 0. 0. 0. 0. 0. 0.]	-	-	Q61R	-	-	-
181	TCGA-EE-A2MU-06A-11-A20N-20	TCGA-EE-A2MU	SKCM	Metastatic	[ 0. 1. 0. 0. 0. 0. 0. 0. 0. 0. 0. 0. 0. 0. 0. 0. 0.]	-	-	-	-	-	-
182	TCGA-FS-A1ZP-06A-21-A20N-20	TCGA-FS-A1ZP	SKCM	Metastatic	[ 0. 1. 0. 0. 0. 0. 0. 0. 0. 0. 0. 0. 0. 0. 0. 0. 0.]	-	Q61L	-	-	-	-
183	TCGA-FR-A7U9-06A-21-A444-20	TCGA-FR-A7U9	SKCM	Metastatic	[ 0. 1. 0. 0. 0. 0. 0. 0. 0. 0. 0. 0. 0. 0. 0. 0. 0.]	-	-	-	-	-	-
184	TCGA-EE-A20C-06A-21-A20M-20	TCGA-EE-A20C	SKCM	Metastatic	[ 0. 1. 0. 0. 0. 0. 0. 0. 0. 0. 0. 0. 0. 0. 0. 0. 0.]	-	-	Q61R	-	-	-
185	TCGA-DA-A95Z-06A-21-A444-20	TCGA-DA-A95Z	SKCM	Metastatic	[ 0. 1. 0. 0. 0. 0. 0. 0. 0. 0. 0. 0. 0. 0. 0. 0. 0.]	-	-	-	-	-	-
186	TCGA-FS-A4F9-06A-21-A443-20	TCGA-FS-A4F9	SKCM	Metastatic	[ 0. 1. 0. 0. 0. 0. 0. 0. 0. 0. 0. 0. 0. 0. 0. 0. 0.]	-	-	-	Q61K	-	-
187	TCGA-EE-A29S-06A-21-A20M-20	TCGA-EE-A29S	SKCM	Metastatic	[ 0. 1. 0. 0. 0. 0. 0. 0. 0. 0. 0. 0. 0. 0. 0. 0. 0.]	-	Q61L	-	-	-	-
188	TCGA-ER-A19W-06A-31-A241-20	TCGA-ER-A19W	SKCM	Metastatic	[ 0. 1. 0. 0. 0. 0. 0. 0. 0. 0. 0. 0. 0. 0. 0. 0. 0.]	-	-	-	Q61K	-	-
189	TCGA-D9-A149-06A-21-A20M-20	TCGA-D9-A149	SKCM	Metastatic	[ 0. 1. 0. 0. 0. 0. 0. 0. 0. 0. 0. 0. 0. 0. 0. 0. 0.]	-	-	-	-	-	-
190	TCGA-D9-A6EC-06A-21-A444-20	TCGA-D9-A6EC	SKCM	Metastatic	[ 0. 1. 1. -1. 0. 0. -1. 0. 0. -1. 0. 0. 0. 0. 0. 0. 0.]	-	-	-	-	-	-
191	TCGA-FS-A1ZQ-06A-21-A20N-20	TCGA-FS-A1ZQ	SKCM	Metastatic	[ 0. 1. 0. 0. 0. 0. 0. 0. 0. 0. 0. 0. 0. 0. 0. 0. 0.]	-	-	Q61R	-	-	-
192	TCGA-WE-A8ZO-06A-21-A444-20	TCGA-WE-A8ZO	SKCM	Metastatic	[ 0. 1. 0. 0. 0. 0. 0. 0. 0. 0. 0. 0. 0. 0. 0. 0. 0.]	-	-	Q61R	-	-	-
193	TCGA-EE-A2GL-06A-21-A20M-20	TCGA-EE-A2GL	SKCM	Metastatic	[ 0. 1. 0. 0. 0. 0. 0. -1. 0. 0. 0. 0. 0. 0. 0. 0. 0.]	-	-	-	Q61K	-	-
194	TCGA-D3-A8GK-06A-21-A443-20	TCGA-D3-A8GK	SKCM	Metastatic	[ 0. 1. 0. 0. 0. 0. 0. 0. 0. 0. 0. 0. 0. 0. 0. 0. 0.]	-	-	Q61R	-	-	-
195	TCGA-D3-A3ML-06A-21-A241-20	TCGA-D3-A3ML	SKCM	Metastatic	[ 0. 1. 0. 0. 0. -1. 0. 0. 0. 0. 0. 0. 0. 0. 0. 0. 0.]	-	Q61L	-	-	-	-
196	TCGA-EE-A3JD-06A-21-A241-20	TCGA-EE-A3JD	SKCM	Metastatic	[ 0. 1. 0. 0. 0. 0. 0. 0. 0. 0. 0. 0. 0. 0. 0. 0. 0.]	-	-	-	-	-	-
197	TCGA-D3-A1QB-06A-21-A20M-20	TCGA-D3-A1QB	SKCM	Metastatic	[ 0. 1. 0. 0. 0. 0. 0. 0. 0. 0. 0. 0. 0. 0. 0. 0. 0.]	-	Q61L	-	-	-	-
198	TCGA-EE-A29G-06A-21-A20M-20	TCGA-EE-A29G	SKCM	Metastatic	[ 0. 1. 0. 0. 0. 0. 0. 0. 0. 0. 0. 0. 0. 0. 0. 0. 0.]	-	-	-	Q61K	-	-
199	TCGA-ER-A3ES-06A-21-A241-20	TCGA-ER-A3ES	SKCM	Metastatic	[ 0. 1. 0. 0. 0. 0. 0. 0. 0. 0. 0. 0. 0. 0. 0. 0. 0.]	-	-	-	-	-	-
200	TCGA-EE-A2GR-06A-21-A20M-20	TCGA-EE-A2GR	SKCM	Metastatic	[ 1. 0. 1. -1. -1. 0. 0. 0. 0. 0. 0. 0. 0. 0. 0. 0. 0.]	-	-	-	-	-	-
201	TCGA-EB-A299-01A-11-A20M-20	TCGA-EB-A299	SKCM	Primary	[ 1. 1. 1. -1. 0. 0. 0. 0. 0. 0. 0. 0. 0. 0. 0. 0. 0.]	+	-	-	-	-	-
202	TCGA-EB-A4IS-01A-11-A443-20	TCGA-EB-A4IS	SKCM	Primary	[ 0. 1. 0. 0. 0. 0. 0. 0. 0. 0. 0. 0. 0. 0. 0. 0. 0.]	+	-	-	-	-	-
203	TCGA-GF-A2C7-01A-21-A20N-20	TCGA-GF-A2C7	SKCM	Primary	[ 0. 1. 0. 1. 0. 0. 0. 0. 0. 0. 0. 0. 0. 0. 0. 0. 0.]	+	-	-	-	-	-
204	TCGA-EB-A431-01A-21-A443-20	TCGA-EB-A431	SKCM	Primary	[ 1. 1. 1. -1. 0. -1. 0. 0. 0. 0. 0. 0. 0. 0. 0. 0. 0.]	+	-	-	-	-	-
205	TCGA-XV-AAZV-01A-21-A444-20	TCGA-XV-AAZV	SKCM	Primary	[ 0. 1. 0. 0. 0. 0. 0. 0. 0. 0. 0. 0. 0. 0. 0. 0. 0.]	+	-	-	-	-	-
206	TCGA-BF-A3DL-01A-21-A241-20	TCGA-BF-A3DL	SKCM	Primary	[ 0. 0. 0. 0. 0. 0. 0. 0. 0. 0. 1. 0. 0. 0. 0. 0. 0.]	+	-	-	-	-	-
207	TCGA-EB-A550-01A-51-A444-20	TCGA-EB-A550	SKCM	Primary	[ 0. 1. 0. 0. 0. 0. 0. 1. 0. 0. 0. 0. 0. 0. 0. 0. 0.]	+	-	-	-	-	-
208	TCGA-EB-A85I-01A-21-A443-20	TCGA-EB-A85I	SKCM	Primary	[ 1. 0. 0. 0. 0. 1. 0. 0. 0. 1. 0. 0. 0. 0. 0. 0. 0.]	+	-	-	-	-	-
209	TCGA-BF-A3DJ-01A-21-A241-20	TCGA-BF-A3DJ	SKCM	Primary	[ 0. 1. 0. 0. 0. 1. 0. -1. 0. 0. 0. 0. 0. 0. 0. 0. 0.]	+	-	-	-	-	-
210	TCGA-EB-A553-01A-21-A443-20	TCGA-EB-A553	SKCM	Primary	[ 0. 1. 0. 0. 0. 1. 0. 0. 0. 0. 0. 0. 0. 0. 0. 0. 0.]	+	-	-	-	-	-
211	TCGA-BF-A3DN-01A-21-A241-20	TCGA-BF-A3DN	SKCM	Primary	[ 1. 1. 1. 0. -1. -1. 0. 0. 0. 0. 0. 0. 0. 0. 0. 0. 0.]	+	-	-	-	-	-
212	TCGA-BF-AAP7-01A-21-A443-20	TCGA-BF-AAP7	SKCM	Primary	[ 0. 1. 0. 0. 0. 0. 0. 0. 0. 0. 0. 0. 0. 0. 0. 0. 0.]	+	-	-	-	-	-
213	TCGA-XV-A9W5-01A-21-A444-20	TCGA-XV-A9W5	SKCM	Primary	[ 1. 1. 0. 0. 0. 0. 0. 0. 0. 0. 0. 0. 0. 0. 0. 0. 0.]	+	-	-	-	-	-
214	TCGA-EB-A6QZ-01A-21-A444-20	TCGA-EB-A6QZ	SKCM	Primary	[ 0. 1. 0. 0. 0. 0. 0. 0. 0. 0. 0. 0. 0. 0. 0. 0. 0.]	+	-	-	-	-	-
215	TCGA-EB-A3Y6-01A-11-A241-20	TCGA-EB-A3Y6	SKCM	Primary	[ 0. 1. 0. 0. 0. -1. 0. 0. 0. 0. 0. 0. 0. 0. 0. 0. 0.]	+	-	-	-	-	-
216	TCGA-D3-A2JN-06A-21-A20M-20	TCGA-D3-A2JN	SKCM	Primary	[ 0. 0. 0. 0. -1. 0. 0. 0. 0. 0. 0. -1. 0. 0. 0. 0. 0.]	+	-	-	-	-	-
217	TCGA-EE-A2M6-06A-21-A20M-20	TCGA-EE-A2M6	SKCM	Primary	[ 0. 1. 0. 0. 0. 0. 0. 0. 0. 0. 0. 0. 0. 0. 0. 0. 0.]	+	-	-	-	-	-
218	TCGA-D9-A148-06A-21-A20M-20	TCGA-D9-A148	SKCM	Primary	[ 0. 1. 0. 0. 0. 0. 0. 0. 0. 0. 0. 0. 0. 0. 0. 0. 0.]	+	-	-	-	-	-
219	TCGA-QB-A6FS-06A-21-A444-20	TCGA-QB-A6FS	SKCM	Primary	[ 1. 1. 1. -1. 0. 0. -1. 0. 0. 0. 0. 0. 0. 0. 0. 0. 0.]	+	-	-	-	-	-
220	TCGA-FS-A1ZD-06A-21-A20N-20	TCGA-FS-A1ZD	SKCM	Primary	[ 0. 1. 0. 0. 0. 0. 0. 0. 0. 0. 0. 0. 0. 0. 0. 0. 0.]	+	-	-	-	-	-
221	TCGA-GF-A6C8-06A-21-A444-20	TCGA-GF-A6C8	SKCM	Primary	[ 0. 1. 0. 0. 0. -1. 0. 0. 0. 0. 0. 0. 0. 0. 0. 0. 0.]	+	-	-	-	-	-
222	TCGA-ER-A19J-06A-21-A20N-20	TCGA-ER-A19J	SKCM	Primary	[ 1. 0. 1. 0. -1. 0. 0. 0. 0. 0. 0. 0. 0. 0. 0. 0. 0.]	+	-	-	-	-	-
223	TCGA-DA-A1I5-06A-21-A20M-20	TCGA-DA-A1I5	SKCM	Primary	[ 1. 0. 1. -1. 0. 0. -1. 0. 0. 0. 0. 0. 0. 0. 1. 0. 0.]	+	-	-	-	-	-
224	TCGA-D3-A8GS-06A-21-A443-20	TCGA-D3-A8GS	SKCM	Primary	[ 1. 1. 0. 0. 0. 0. 0. 0. 0. 0. 0. 0. 0. 0. 0. 0. 0.]	+	-	-	-	-	-
225	TCGA-FS-A1ZC-06A-21-A20N-20	TCGA-FS-A1ZC	SKCM	Primary	[ 0. 1. 0. 0. 0. 0. 0. 0. 0. 0. 0. 0. 0. 0. 0. 0. 0.]	+	-	-	-	-	-
226	TCGA-D3-A51N-06A-21-A443-20	TCGA-D3-A51N	SKCM	Primary	[ 0. 1. 0. 0. 0. 0. 0. 0. 0. 0. 0. 0. 0. 0. 0. 0. 0.]	+	-	-	-	-	-
227	TCGA-D3-A2JP-06A-21-A20M-20	TCGA-D3-A2JP	SKCM	Primary	[ 0. 1. 0. 0. 0. 0. 0. 0. 0. 0. 0. 0. 0. 0. 0. 0. 0.]	+	-	-	-	-	-
228	TCGA-WE-A8ZQ-06A-51-A444-20	TCGA-WE-A8ZQ	SKCM	Primary	[ 0. 1. 0. 0. 0. 0. 0. 0. 0. 0. 0. 0. 0. 0. 0. 0. 0.]	+	-	-	-	-	-
229	TCGA-GN-A4U7-06A-31-A443-20	TCGA-GN-A4U7	SKCM	Primary	[ 0. 1. 0. 1. 0. 0. 0. 0. 0. 0. 0. 0. 0. 0. 0. 0. 0.]	+	-	-	-	-	-
230	TCGA-EE-A3AD-06A-21-A20N-20	TCGA-EE-A3AD	SKCM	Primary	[ 0. 1. 0. 0. 0. 0. 0. 0. 0. 0. 0. 0. 0. 0. 0. 0. 0.]	+	-	-	-	-	-
231	TCGA-FR-A44A-06A-21-A443-20	TCGA-FR-A44A	SKCM	Primary	[ 0. 1. 0. 1. 0. 0. 0. 0. 0. 0. 0. 0. 0. 0. 0. 0. 0.]	+	-	-	-	-	-
232	TCGA-XV-AB01-01A-21-A444-20	TCGA-XV-AB01	SKCM	Metastatic	[ 0. 1. 0. 0. 0. 0. 0. 0. 0. 0. 0. 0. 0. 0. 0. 0. 0.]	+	-	-	-	-	-
233	TCGA-D9-A4Z2-01A-21-A443-20	TCGA-D9-A4Z2	SKCM	Metastatic	[ 0. 1. 0. 0. 0. 0. 0. 0. 0. 0. 0. 0. 0. 0. 0. 0. 0.]	+	-	-	-	-	-
234	TCGA-EB-A3XD-01A-11-A241-20	TCGA-EB-A3XD	SKCM	Metastatic	[ 1. 1. 0. 0. -1. 0. 0. 0. 0. 0. 0. 0. 0. 0. 0. 0. 0.]	+	-	-	-	-	-
235	TCGA-EB-A5FP-01A-21-A443-20	TCGA-EB-A5FP	SKCM	Metastatic	[ 0. 1. 0. 0. 0. 0. 0. 0. 0. 0. 0. 0. 0. 0. 0. 0. 0.]	+	-	-	-	-	-
236	TCGA-EB-A5SE-01A-21-A444-20	TCGA-EB-A5SE	SKCM	Metastatic	[ 0. 1. 0. 0. 0. 0. 0. 0. 0. 0. 0. 0. 0. 0. 0. 0. 0.]	+	-	-	-	-	-
237	TCGA-EB-A3XE-01A-21-A241-20	TCGA-EB-A3XE	SKCM	Metastatic	[ 0. 1. 0. 0. 0. 0. 0. 0. 0. 0. 0. 0. 0. 0. 0. 0. 0.]	+	-	-	-	-	-
238	TCGA-D3-A1Q5-06A-21-A20M-20	TCGA-D3-A1Q5	SKCM	Metastatic	[ 0. 1. 0. 0. 0. 0. 0. 0. 0. 0. 0. 0. 0. 0. 0. 0. 0.]	+	-	-	-	-	-
239	TCGA-EE-A29T-06A-21-A20M-20	TCGA-EE-A29T	SKCM	Metastatic	[ 0. 1. 0. 0. 0. -1. 0. 0. 1. 0. 0. 0. 0. 0. 0. 0. 0.]	+	-	-	-	-	-
240	TCGA-D3-A3MO-06A-21-A241-20	TCGA-D3-A3MO	SKCM	Metastatic	[ 0. 1. 0. 0. 0. 0. 0. 0. 1. 0. 0. 0. 0. 0. 0. 0. 0.]	+	-	-	-	-	-
241	TCGA-EE-A20F-06A-41-A20M-20	TCGA-EE-A20F	SKCM	Metastatic	[ 0. 1. 0. 0. 0. 1. 0. 0. 0. 0. 0. 0. 0. 0. 0. 0. 0.]	+	-	-	-	-	-
242	TCGA-D3-A2JD-06A-21-A20M-20	TCGA-D3-A2JD	SKCM	Metastatic	[ 0. 1. 0. 0. 0. 0. 0. 0. 0. 0. 0. 0. 0. 0. 0. 0. 0.]	+	-	-	-	-	-
243	TCGA-EE-A2MP-06A-21-A20N-20	TCGA-EE-A2MP	SKCM	Metastatic	[ 0. 1. 0. 0. 0. 0. 0. 0. 1. 0. 0. 0. 0. 0. 0. 0. 0.]	+	-	-	-	-	-
244	TCGA-D3-A1Q4-06A-21-A20M-20	TCGA-D3-A1Q4	SKCM	Metastatic	[ 0. 1. 0. 0. 0. 0. 0. 0. 0. 0. 0. 0. 0. 0. 0. 0. 0.]	+	-	-	-	-	-
245	TCGA-EE-A29P-06A-21-A20M-20	TCGA-EE-A29P	SKCM	Metastatic	[ 0. 1. 0. 0. 0. 0. 0. 1. 0. 0. 0. 0. 0. 0. 0. 0. 0.]	+	-	-	-	-	-
246	TCGA-ER-A19S-06A-21-A215-20	TCGA-ER-A19S	SKCM	Metastatic	[ 0. 1. 0. 0. 0. 0. 0. 0. 0. 0. 0. 0. 0. 0. 0. 0. 0.]	+	-	-	-	-	-
247	TCGA-D3-A1Q7-06A-21-A20M-20	TCGA-D3-A1Q7	SKCM	Metastatic	[ 0. 1. 0. 0. 0. 0. 0. 0. 0. 0. 0. 0. 0. 0. 0. 0. 0.]	+	-	-	-	-	-
248	TCGA-GN-A4U8-06A-22-A444-20	TCGA-GN-A4U8	SKCM	Metastatic	[ 0. 1. 0. 0. 0. 0. 0. 0. 0. 0. 0. 0. 0. 0. 0. 0. 0.]	+	-	-	-	-	-
249	TCGA-D3-A1Q9-06A-21-A20M-20	TCGA-D3-A1Q9	SKCM	Metastatic	[ 0. 1. 0. 0. 0. 0. 0. 0. 0. 0. 0. 0. 0. 0. 0. 0. 0.]	+	-	-	-	-	-
250	TCGA-EE-A2M5-06A-21-A20M-20	TCGA-EE-A2M5	SKCM	Metastatic	[ 0. 1. 0. 0. 0. 0. 0. 0. 0. 0. 0. 0. 0. 0. 0. 0. 0.]	+	-	-	-	-	-
251	TCGA-DA-A1I2-06A-31-A20M-20	TCGA-DA-A1I2	SKCM	Metastatic	[ 0. 1. 1. 0. 0. 0. -1. 0. -1. 0. 0. 0. 0. 0. 0. 0. 0.]	+	-	-	-	-	-
252	TCGA-EE-A2A6-06A-21-A20M-20	TCGA-EE-A2A6	SKCM	Metastatic	[ 0. 1. 0. 0. 0. 0. 0. 0. 0. 0. 0. 0. 0. 0. 0. 0. 0.]	+	-	-	-	-	-
253	TCGA-ER-A198-06A-21-A20N-20	TCGA-ER-A198	SKCM	Metastatic	[ 0. 1. 0. 0. 0. 1. 0. 0. 0. 0. 0. 0. 0. 0. 0. -1. 0.]	+	-	-	-	-	-
254	TCGA-D3-A8GN-06A-21-A443-20	TCGA-D3-A8GN	SKCM	Metastatic	[ 1. 1. 0. 0. -1. 1. 0. 0. 0. 0. 0. 0. 0. 0. 0. 0. 0.]	+	-	-	-	-	-
255	TCGA-LH-A9QB-06A-21-A444-20	TCGA-LH-A9QB	SKCM	Metastatic	[ 1. 1. 1. -1. 0. 0. 0. 0. 1. 0. 0. 0. 0. 0. 0. 0. 1.]	+	-	-	-	-	-
256	TCGA-D3-A3C3-06A-21-A20M-20	TCGA-D3-A3C3	SKCM	Metastatic	[ 0. 1. 0. -1. 0. 1. 0. 0. 0. 0. 0. 0. 0. 0. 0. 0. 0.]	+	-	-	-	-	-
257	TCGA-DA-A95W-06A-21-A444-20	TCGA-DA-A95W	SKCM	Metastatic	[ 0. 1. 0. 0. 0. 0. 0. 0. 0. 0. 0. 0. 0. 0. 0. 0. 0.]	+	-	-	-	-	-
258	TCGA-GN-A265-06A-11-A20N-20	TCGA-GN-A265	SKCM	Metastatic	[ 0. 1. 0. 0. 0. 0. 0. 0. 0. 0. 0. 0. 0. 0. 0. 0. 0.]	+	-	-	-	-	-
259	TCGA-EE-A29E-06A-21-A20M-20	TCGA-EE-A29E	SKCM	Metastatic	[ 0. 1. 0. 0. 0. 0. 0. 0. 0. 0. 0. 0. 0. 0. 0. 0. 0.]	+	-	-	-	-	-
260	TCGA-D3-A8GV-06A-21-A443-20	TCGA-D3-A8GV	SKCM	Metastatic	[ 0. 1. 0. 0. 0. 1. 0. 0. 0. 0. 0. 0. 0. 0. 0. 0. 0.]	+	-	-	-	-	-
261	TCGA-BF-AAP0-06A-21-A443-20	TCGA-BF-AAP0	SKCM	Metastatic	[ 0. 1. 0. 0. 0. 0. 0. 0. 0. 0. 0. 0. 0. 0. 0. 0. 0.]	+	-	-	-	-	-
262	TCGA-D9-A1JX-06A-21-A20M-20	TCGA-D9-A1JX	SKCM	Metastatic	[ 0. 1. 0. 0. 0. 0. 0. 0. 0. 0. 0. 0. 0. 0. 0. 0. 0.]	+	-	-	-	-	-
263	TCGA-YD-A9TB-06A-21-A443-20	TCGA-YD-A9TB	SKCM	Metastatic	[ 0. 1. 0. 0. 0. -1. 0. 0. 0. 0. 0. 0. 0. 0. 0. 0. 0.]	+	-	-	-	-	-
264	TCGA-EE-A3J3-06A-21-A241-20	TCGA-EE-A3J3	SKCM	Metastatic	[ 0. 1. 0. 0. 0. 0. 0. 0. 0. 0. 0. 0. 1. 0. 0. 0. 0.]	+	-	-	-	-	-
265	TCGA-DA-A1I4-06A-21-A20M-20	TCGA-DA-A1I4	SKCM	Metastatic	[ 0. 1. 0. 0. 0. 0. 0. 0. 0. 0. 0. 0. 0. 0. 0. 0. 0.]	+	-	-	-	-	-
266	TCGA-EE-A3AG-06A-21-A20N-20	TCGA-EE-A3AG	SKCM	Metastatic	[ 0. 1. 0. 1. 0. 0. 0. 0. 0. 0. 0. 0. 0. 0. 0. 0. 0.]	+	-	-	-	-	-
267	TCGA-DA-A3F5-06A-21-A241-20	TCGA-DA-A3F5	SKCM	Metastatic	[ 0. 1. 0. 0. 0. 0. 0. 0. 0. 0. 0. 0. 0. 0. 0. 0. 0.]	+	-	-	-	-	-
268	TCGA-ER-A19M-06A-51-A241-20	TCGA-ER-A19M	SKCM	Metastatic	[ 0. 1. 0. 0. -1. 0. 0. 0. 0. 0. 0. 0. 0. 0. 0. 0. 0.]	+	-	-	-	-	-
269	TCGA-DA-A1I8-06A-21-A20M-20	TCGA-DA-A1I8	SKCM	Metastatic	[ 1. 1. 0. -1. 0. 0. -1. 0. 0. 0. 0. 0. 0. 0. 0. 0. 0.]	+	-	-	-	-	-
270	TCGA-EE-A2GS-06A-21-A20M-20	TCGA-EE-A2GS	SKCM	Metastatic	[ 0. 1. 0. 0. 0. 0. 0. 0. 0. 0. 0. 0. 0. 0. 0. 0. 0.]	+	-	-	-	-	-
271	TCGA-EE-A2GH-06A-21-A20M-20	TCGA-EE-A2GH	SKCM	Metastatic	[ 0. 1. 0. 0. 0. 0. 0. 0. 0. 0. 0. 0. 0. 0. 0. 0. 0.]	+	-	-	-	-	-
272	TCGA-D3-A3MR-06A-21-A241-20	TCGA-D3-A3MR	SKCM	Metastatic	[ 0. 1. 0. 0. 0. 0. 0. 0. 0. 0. 0. 0. 0. 0. 0. 0. 0.]	+	-	-	-	-	-
273	TCGA-ER-A19O-06A-21-A20N-20	TCGA-ER-A19O	SKCM	Metastatic	[ 0. 1. 0. 0. 0. 0. 1. 0. 0. 0. 0. 0. 0. 0. 0. 0. 0.]	+	-	-	-	-	-
274	TCGA-D3-A5GN-06A-21-A444-20	TCGA-D3-A5GN	SKCM	Metastatic	[ 0. 1. 0. 0. 0. 0. 0. 0. 0. 0. 0. 0. 0. 0. 0. 0. 0.]	+	-	-	-	-	-
275	TCGA-WE-A8ZR-06A-21-A444-20	TCGA-WE-A8ZR	SKCM	Metastatic	[ 0. 1. 0. 0. 0. 0. 0. 0. 0. 0. 0. 0. 0. 0. 0. 0. 0.]	+	-	-	-	-	-
276	TCGA-D9-A6E9-06A-21-A444-20	TCGA-D9-A6E9	SKCM	Metastatic	[ 0. 1. 0. 0. 0. 0. 0. 0. 0. 0. 0. 0. 0. 0. 0. 0. 0.]	+	-	-	-	-	-
277	TCGA-WE-AAA4-06A-21-A444-20	TCGA-WE-AAA4	SKCM	Metastatic	[ 0. 1. 0. 0. 0. 0. 0. 0. 0. 0. 0. 0. 0. 0. 0. 0. 0.]	+	-	-	-	-	-
278	TCGA-ER-A19C-06A-21-A20N-20	TCGA-ER-A19C	SKCM	Metastatic	[ 0. 1. 0. 0. 0. 0. 0. 1. 0. 0. 0. 0. 0. 0. 0. 0. 0.]	+	-	-	-	-	-
279	TCGA-HR-A5NC-01A-21-A444-20	TCGA-HR-A5NC	SKCM	Metastatic	[ 0. 1. 0. 0. 0. -1. 0. 0. 0. 0. 0. 0. 0. 0. 0. 0. 0.]	+	-	-	-	-	-
280	TCGA-BF-A5EQ-01A-41-A443-20	TCGA-BF-A5EQ	SKCM	Metastatic	[ 0. 1. 0. 0. 0. 0. 0. 0. 0. 0. 0. 0. 0. 0. 0. 0. 0.]	+	-	-	-	-	-
281	TCGA-EB-A3HV-01A-21-A241-20	TCGA-EB-A3HV	SKCM	Metastatic	[ 0. 1. 0. 0. 0. 0. 0. 0. 0. 0. 0. 0. 0. 0. 0. 0. 0.]	+	-	-	-	-	-
282	TCGA-FR-A728-01A-21-A444-20	TCGA-FR-A728	SKCM	Metastatic	[ 1. 1. 1. -1. 0. 0. -1. -1. 0. 0. 0. 0. 0. 0. 0. 0. 0.]	+	-	-	-	-	-
283	TCGA-FS-A1ZN-01A-21-A20N-20	TCGA-FS-A1ZN	SKCM	Metastatic	[ 0. 1. 0. 0. 0. 0. 0. 0. 0. 0. 0. 0. 0. 0. 0. 0. 0.]	+	-	-	-	-	-
284	TCGA-BF-A5ER-01A-21-A443-20	TCGA-BF-A5ER	SKCM	Metastatic	[ 0. 1. 0. 0. 0. 0. 0. 0. 0. 0. 0. 0. 0. 0. 0. 0. 0.]	+	-	-	-	-	-
285	TCGA-GN-A263-01A-21-A20N-20	TCGA-GN-A263	SKCM	Metastatic	[ 0. 1. 0. 0. 0. 1. 0. 0. 0. 0. 0. 0. 0. 0. 0. 0. 0.]	+	-	-	-	-	-
286	TCGA-EB-A6QY-01A-21-A444-20	TCGA-EB-A6QY	SKCM	Metastatic	[ 0. 1. 0. 0. 0. 0. 0. 0. 0. 0. 0. 0. 0. 0. 0. 0. 0.]	+	-	-	-	-	-
287	TCGA-EB-A44P-01A-21-A443-20	TCGA-EB-A44P	SKCM	Metastatic	[ 0. 1. 0. 0. 0. 0. 0. 0. -1. 0. -1. 0. 0. 0. 0. 0. 0.]	+	-	-	-	-	-
288	TCGA-EB-A44N-01A-21-A443-20	TCGA-EB-A44N	SKCM	Metastatic	[ 0. 1. 0. 0. -1. 1. 0. 0. 0. 0. 0. 0. 0. 0. 0. 0. 0.]	+	-	-	-	-	-
289	TCGA-HR-A2OH-01A-21-A20N-20	TCGA-HR-A2OH	SKCM	Metastatic	[ 0. 1. 0. 0. 0. 0. 0. 0. 0. 0. 0. 0. 0. 0. 0. 0. 0.]	+	-	-	-	-	-
290	TCGA-GN-A269-01A-21-A20N-20	TCGA-GN-A269	SKCM	Metastatic	[ 0. 1. 0. 0. 0. 1. 0. 1. 0. 0. 0. 0. 0. 0. 0. 0. 0.]	+	-	-	-	-	-
291	TCGA-EB-A3XF-01A-41-A241-20	TCGA-EB-A3XF	SKCM	Metastatic	[ 0. 1. 0. 0. 0. 0. 0. 0. 0. 0. 0. 0. 0. 0. 0. 0. 0.]	+	-	-	-	-	-
292	TCGA-EB-A3XB-01A-21-A241-20	TCGA-EB-A3XB	SKCM	Metastatic	[ 0. 1. 0. -1. 0. 0. -1. 0. 0. 0. 0. 0. 0. 0. 0. 0. 0.]	+	-	-	-	-	-
293	TCGA-EB-A24C-01A-21-A20M-20	TCGA-EB-A24C	SKCM	Metastatic	[ 0. 1. 0. 0. 0. 1. 0. 0. 0. 0. 0. 0. 0. 0. 0. 0. 0.]	+	-	-	-	-	-
294	TCGA-XV-AAZW-01A-21-A444-20	TCGA-XV-AAZW	SKCM	Metastatic	[ 0. 1. 0. 0. 0. 1. 0. 0. 0. -1. 0. 0. 0. 0. 0. 0. 0.]	+	-	-	-	-	-
295	TCGA-EB-A6R0-01A-21-A444-20	TCGA-EB-A6R0	SKCM	Metastatic	[ 0. 1. 0. 0. 0. 1. 0. 0. 0. 0. 0. 0. 0. 0. 0. 0. 0.]	+	-	-	-	-	-
296	TCGA-ER-A19K-01A-41-A20N-20	TCGA-ER-A19K	SKCM	Metastatic	[ 0. 1. 1. -1. 0. -1. 0. 0. 0. 0. 0. 0. 0. 0. 0. 0. 0.]	+	-	-	-	-	-
297	TCGA-BF-AAP6-01A-21-A443-20	TCGA-BF-AAP6	SKCM	Metastatic	[ 0. 1. 1. -1. 0. 0. -1. 0. 0. 0. 0. 0. 0. 0. 0. 0. 0.]	+	-	-	-	-	-
298	TCGA-BF-A3DM-01A-21-A241-20	TCGA-BF-A3DM	SKCM	Metastatic	[ 0. 1. 0. 0. 0. 0. 0. 0. 0. 0. 0. 0. 0. 0. 0. 0. 0.]	+	-	-	-	-	-
299	TCGA-IH-A3EA-01A-21-A241-20	TCGA-IH-A3EA	SKCM	Metastatic	[ 0. 1. 0. 0. 0. 0. 0. 0. 0. 0. 0. 0. 0. 0. 0. 0. 0.]	+	-	-	-	-	-
300	TCGA-EB-A42Z-01A-21-A443-20	TCGA-EB-A42Z	SKCM	Metastatic	[ 0. 1. 0. 0. 0. 0. 0. 0. 0. 0. 0. 0. 0. 0. 0. 0. 0.]	+	-	-	-	-	-
301	TCGA-EB-A430-01A-21-A443-20	TCGA-EB-A430	SKCM	Metastatic	[ 0. 1. 0. 0. 0. 0. 0. 0. -1. 0. 0. 0. 0. 0. 0. 0. 0.]	+	-	-	-	-	-
302	TCGA-BF-A1PU-01A-21-A20M-20	TCGA-BF-A1PU	SKCM	Metastatic	[ 0. 1. 0. 0. 0. 0. 0. 0. 0. 0. 0. 0. 0. 0. 0. 0. 0.]	+	-	-	-	-	-
303	TCGA-D3-A51F-06A-21-A444-20	TCGA-D3-A51F	SKCM	Metastatic	[ 0. 1. 0. 0. 0. 0. 0. 0. 0. 0. 0. 0. 0. 0. 0. 0. 0.]	+	-	-	-	-	-
304	TCGA-GF-A4EO-06A-21-A443-20	TCGA-GF-A4EO	SKCM	Metastatic	[ 0. 1. 0. 0. 0. 0. 0. 0. 0. 0. 0. 0. 0. 0. 0. 0. 0.]	+	-	-	-	-	-
305	TCGA-OD-A75X-06A-21-A443-20	TCGA-OD-A75X	SKCM	Metastatic	[ 0. 1. 0. 0. 0. 0. 0. 0. 0. 0. 0. 0. 0. 0. 0. 0. 0.]	+	-	-	-	-	-
306	TCGA-FW-A3TV-06A-21-A241-20	TCGA-FW-A3TV	SKCM	Metastatic	[ 1. 1. 0. 0. -1. 0. 0. 0. 0. 0. 0. 0. 0. 0. 0. 0. 0.]	+	-	-	-	-	-
307	TCGA-ER-A2ND-06A-21-A20N-20	TCGA-ER-A2ND	SKCM	Metastatic	[ 0. 1. 0. 0. 0. 0. 0. 0. 0. 0. 0. 0. 0. 0. 0. 0. 0.]	+	-	-	-	-	-
308	TCGA-W3-AA1Q-06A-21-A444-20	TCGA-W3-AA1Q	SKCM	Metastatic	[ 0. 1. 0. -1. 0. 0. 0. 0. 0. 0. 0. 0. 0. 0. 0. 0. 0.]	+	-	-	-	-	-
309	TCGA-ER-A42L-06A-21-A444-20	TCGA-ER-A42L	SKCM	Metastatic	[ 1. 0. 1. -1. -1. 0. 0. 0. 0. 1. 0. 0. 0. 0. 0. 0. 0.]	+	-	-	-	-	-
310	TCGA-ER-A19Q-06A-21-A215-20	TCGA-ER-A19Q	SKCM	Metastatic	[ 0. 1. 0. 0. 0. 0. 0. 0. 0. 0. 0. 0. 0. 0. 0. 0. 0.]	+	-	-	-	-	-
311	TCGA-D3-A3CB-06A-21-A20M-20	TCGA-D3-A3CB	SKCM	Metastatic	[ 0. 1. 0. 0. 1. 0. 0. 0. 0. 0. 0. 0. 0. 0. 0. 0. 0.]	+	-	-	-	-	-
312	TCGA-D3-A1Q6-06A-21-A20M-20	TCGA-D3-A1Q6	SKCM	Metastatic	[ 0. 1. 0. 0. 0. 0. 0. 0. 0. 0. 0. 0. 0. 0. 0. 0. 0.]	+	-	-	-	-	-
313	TCGA-ER-A3PL-06A-21-A241-20	TCGA-ER-A3PL	SKCM	Metastatic	[ 0. 1. 0. 0. 0. 0. 0. 0. 0. 0. 0. 0. 0. 0. 0. 0. 0.]	+	-	-	-	-	-
314	TCGA-DA-A1HY-06A-21-A20M-20	TCGA-DA-A1HY	SKCM	Metastatic	[ 0. 1. 0. 0. 0. 0. 0. 0. 0. 0. 0. 0. 0. 0. 0. 0. 0.]	+	-	-	-	-	-
315	TCGA-DA-A1I0-06A-21-A241-20	TCGA-DA-A1I0	SKCM	Metastatic	[ 0. 1. 0. 0. 0. 0. 0. -1. 0. 0. 0. 0. 0. 0. 0. 0. 0.]	+	-	-	-	-	-
316	TCGA-ER-A19H-06A-21-A20N-20	TCGA-ER-A19H	SKCM	Metastatic	[ 0. 1. 0. 0. 0. 1. 0. 1. 0. 0. 0. 0. 0. 0. 0. 0. 0.]	+	-	-	-	-	-
317	TCGA-ER-A2NG-06A-21-A20N-20	TCGA-ER-A2NG	SKCM	Metastatic	[ 0. 1. 0. 0. 0. 0. 0. 1. 0. 0. 0. 0. 0. 0. 0. 0. 0.]	+	-	-	-	-	-
318	TCGA-WE-A8K6-06A-21-A443-20	TCGA-WE-A8K6	SKCM	Metastatic	[ 0. 1. 0. 0. 0. 1. 0. 0. 0. 0. 0. 0. 0. 0. 0. 0. 0.]	+	-	-	-	-	-
319	TCGA-D3-A3C1-06A-21-A20M-20	TCGA-D3-A3C1	SKCM	Metastatic	[ 0. 1. 0. 0. 0. 0. 0. -1. 0. 0. 0. 0. 0. 0. 0. 0. 0.]	+	-	-	-	-	-
320	TCGA-ER-A42K-06A-21-A444-20	TCGA-ER-A42K	SKCM	Metastatic	[ 0. 1. 0. 0. -1. 1. 0. 0. 0. 0. 0. 0. 0. 0. 0. 0. 0.]	+	-	-	-	-	-
321	TCGA-EE-A2GT-06A-21-A20M-20	TCGA-EE-A2GT	SKCM	Metastatic	[ 0. 1. 0. 0. 0. 0. 0. 0. 0. 0. 0. 0. 0. 0. 0. 0. 0.]	+	-	-	-	-	-
322	TCGA-D3-A2JE-06A-21-A443-20	TCGA-D3-A2JE	SKCM	Metastatic	[ 0. 1. 0. 0. 1. 1. 0. 0. 0. 0. 0. 0. 0. 0. 0. 0. 0.]	+	-	-	-	-	-
323	TCGA-EE-A3AB-06A-21-A20N-20	TCGA-EE-A3AB	SKCM	Metastatic	[ 0. 1. 0. 0. 0. 1. 0. 0. 0. 0. 0. 0. 0. 0. 0. 0. 0.]	+	-	-	-	-	-
324	TCGA-D3-A8GB-06A-21-A443-20	TCGA-D3-A8GB	SKCM	Metastatic	[ 0. 1. 0. 0. 0. 0. 0. 0. 0. 0. 0. 0. 0. 0. 0. 0. 0.]	+	-	-	-	-	-
325	TCGA-FS-A1ZM-06A-21-A20N-20	TCGA-FS-A1ZM	SKCM	Metastatic	[ 0. 1. 0. 0. 0. 0. 0. 0. 0. 0. 0. 0. 0. 0. 0. 0. 0.]	+	-	-	-	-	-
326	TCGA-D3-A8GD-06A-21-A443-20	TCGA-D3-A8GD	SKCM	Metastatic	[ 0. 1. 0. 0. 0. 0. 0. 1. 0. 0. 0. 0. 0. 0. 0. 0. 0.]	+	-	-	-	-	-
327	TCGA-ER-A19B-06A-21-A20N-20	TCGA-ER-A19B	SKCM	Metastatic	[ 0. 1. 0. 0. 0. 0. 0. 0. 0. 0. 0. 0. 0. 0. 0. 0. 0.]	+	-	-	-	-	-
328	TCGA-EE-A2M8-06A-21-A20M-20	TCGA-EE-A2M8	SKCM	Metastatic	[ 0. 1. 0. 1. 0. 0. 0. 0. 0. 0. 0. 0. 0. 0. 0. 0. 0.]	+	-	-	-	-	-
329	TCGA-EE-A29M-06A-21-A20M-20	TCGA-EE-A29M	SKCM	Metastatic	[ 0. 1. 0. 0. 0. 0. 0. 0. 0. 0. 0. 0. 0. 0. 0. 0. 0.]	+	-	-	-	-	-
330	TCGA-D3-A3CE-06A-21-A20M-20	TCGA-D3-A3CE	SKCM	Metastatic	[ 0. 1. 0. 0. 0. 0. 0. 0. 0. 0. 0. 0. 0. 0. 0. 0. 0.]	+	-	-	-	-	-
331	TCGA-ER-A19E-06A-21-A20N-20	TCGA-ER-A19E	SKCM	Metastatic	[ 0. 1. 0. 0. 0. 0. 0. 0. 1. 0. 0. 0. -1. 0. 0. 0. 0.]	+	-	-	-	-	-
332	TCGA-EE-A29C-06A-31-A20M-20	TCGA-EE-A29C	SKCM	Metastatic	[ 0. 1. 0. 0. 0. -1. 0. 1. 0. 0. 0. 0. 0. 0. 0. 0. 0.]	+	-	-	-	-	-
333	TCGA-FW-A5DY-06A-21-A443-20	TCGA-FW-A5DY	SKCM	Metastatic	[ 0. 1. 0. 0. 0. 0. 0. 1. 0. 0. 0. 0. 0. 0. 0. 0. 0.]	+	-	-	-	-	-
334	TCGA-WE-A8K5-06A-21-A443-20	TCGA-WE-A8K5	SKCM	Metastatic	[ 0. 1. 0. 0. 0. 0. 0. 0. 0. 0. 0. 0. 0. 0. 0. 0. 0.]	+	-	-	-	-	-
335	TCGA-EE-A29H-06A-21-A20M-20	TCGA-EE-A29H	SKCM	Metastatic	[ 0. 1. 0. 0. 0. 0. 0. 0. 0. 0. 0. 0. 0. 0. 0. 1. 0.]	+	-	-	-	-	-
336	TCGA-FS-A1ZH-06A-21-A20N-20	TCGA-FS-A1ZH	SKCM	Metastatic	[ 0. 1. 0. 0. 0. -1. 0. 0. 0. 0. 0. 0. 0. 0. 1. 0. 0.]	+	-	-	-	-	-
337	TCGA-GN-A26A-06A-21-A20N-20	TCGA-GN-A26A	SKCM	Metastatic	[ 0. 1. 0. 0. 0. 1. 0. 0. 0. 0. 0. 0. 0. 0. 0. 0. 0.]	+	-	-	-	-	-
338	TCGA-FR-A729-06A-21-A444-20	TCGA-FR-A729	SKCM	Metastatic	[ 1. 1. 0. -1. 0. 1. 0. 0. 0. 0. 0. 0. 0. 0. 0. 0. 0.]	+	-	-	-	-	-
339	TCGA-GN-A262-06A-21-A20N-20	TCGA-GN-A262	SKCM	Metastatic	[ 0. 1. 0. 0. 0. 0. 0. 0. 0. 0. 0. 0. 0. 0. 0. 0. 0.]	+	-	-	-	-	-
340	TCGA-WE-A8ZT-06A-21-A444-20	TCGA-WE-A8ZT	SKCM	Metastatic	[ 0. 1. 0. 0. 0. 0. 0. 0. 0. 0. 0. 0. 0. 0. 0. 0. 0.]	+	-	-	-	-	-
341	TCGA-FR-A8YE-06A-21-A444-20	TCGA-FR-A8YE	SKCM	Metastatic	[ 0. 1. 0. 0. 0. 0. 0. 0. 0. 0. 0. 0. 0. 0. 0. 0. 0.]	+	-	-	-	-	-
342	TCGA-EE-A2MK-06A-21-A20N-20	TCGA-EE-A2MK	SKCM	Metastatic	[ 0. 1. 0. 0. 0. 1. 0. 0. 0. 0. 0. 0. 0. 0. 0. 0. 0.]	+	-	-	-	-	-
343	TCGA-EE-A29W-06A-21-A20M-20	TCGA-EE-A29W	SKCM	Metastatic	[ 0. 1. 0. 0. 0. 0. 0. 0. 0. 0. 0. 0. 0. 0. 0. 0. 0.]	+	-	-	-	-	-
344	TCGA-DA-A1HW-06A-21-A20M-20	TCGA-DA-A1HW	SKCM	Metastatic	[ 0. 1. 0. 0. 0. 0. 0. 0. 0. 0. 0. 0. 0. 0. 0. 0. 0.]	+	-	-	-	-	-
345	TCGA-ER-A19P-06A-21-A20N-20	TCGA-ER-A19P	SKCM	Metastatic	[ 0. 1. 0. 0. 0. 0. 0. 0. 0. 0. 0. -1. 0. 0. 0. 0. 0.]	+	-	-	-	-	-
346	TCGA-Z2-AA3V-06A-21-A444-20	TCGA-Z2-AA3V	SKCM	Metastatic	[ 1. 1. 0. 0. 0. 0. 0. 0. 0. 0. 0. 0. 0. 0. 0. 0. 0.]	+	-	-	-	-	-
347	TCGA-EE-A3AF-06A-21-A20N-20	TCGA-EE-A3AF	SKCM	Metastatic	[ 1. 1. 1. -1. 0. -1. 0. 0. 0. 0. 0. 0. 0. 0. 0. 0. 0.]	+	-	-	-	-	-
348	TCGA-DA-A3F8-06A-21-A241-20	TCGA-DA-A3F8	SKCM	Metastatic	[ 0. 1. 0. 0. 0. 0. 0. 0. 0. 0. 0. 0. 0. 0. 0. 0. 0.]	+	-	-	-	-	-
349	TCGA-EE-A3JE-06A-21-A241-20	TCGA-EE-A3JE	SKCM	Metastatic	[ 0. 1. 0. 0. 0. 0. 0. 0. 0. 0. 0. 0. 0. 0. 0. 0. 0.]	+	-	-	-	-	-
350	TCGA-EB-A5UN-06A-21-A443-20	TCGA-EB-A5UN	SKCM	Metastatic	[ 0. 1. 0. 0. 0. 0. 0. 1. 0. 0. 0. 1. 0. 0. 0. 0. 0.]	+	-	-	-	-	-
351	TCGA-ER-A2NC-06A-31-A20N-20	TCGA-ER-A2NC	SKCM	Metastatic	[ 0. 1. 0. 0. 0. 0. 0. 0. 0. 0. 0. 0. 0. 0. 0. 0. 0.]	+	-	-	-	-	-
352	TCGA-ER-A19G-06A-21-A20N-20	TCGA-ER-A19G	SKCM	Metastatic	[ 0. 1. 0. 0. 1. 0. 0. 0. 0. 0. 0. 0. 0. 0. 0. 0. 0.]	+	-	-	-	-	-
353	TCGA-GF-A6C9-06A-21-A444-20	TCGA-GF-A6C9	SKCM	Metastatic	[ 0. 1. 0. 0. 0. 1. 0. 0. -1. 0. 0. 0. 0. 0. 0. 0. 0.]	+	-	-	-	-	-
