# Supplementary material for: Overcoming resistance to BRAFV600E inhibition in melanoma by deciphering and targeting personalized protein network alterations
Source: NPJ Precis Oncol. 2021 Jun 10;5:50. doi: 10.1038/s41698-021-00190-3 (PMC8192524; doi:10.1038/s41698-021-00190-3)
Supplement: Supplementary file 10 — Supplementary Data 9 [file 41698_2021_190_MOESM10_ESM.xlsx]

## Sheet: Cell line barcodes
Sample index	Cell line	Cancer_Type	Patient-specific barcode	Active processes
1	SKMEL3	Skin	'1 0 0 -1 0 -1 0 0 0 0 0 0 0 0 0 0 0'	1 (positive); 4 (negative); 6 (negative);
2	M257	Skin	'1 1 0 0 0 0 0 0 0 0 0 0 0 0 0 0 0'	1 (positive); 2 (positive);
3	SKMEL2	Skin	'1 0 0 0 0 -1 0 0 0 0 0 0 0 0 0 0 0'	1 (positive); 6 (negative);
4	M308	Skin	'1 0 0 -1 0 -1 0 0 0 0 0 0 0 1 0 0 0'	1 (positive); 4 (negative); 6 (negative); 14 (positive);
5	M207	Skin	'1 0 0 -1 0 0 0 -1 0 0 0 0 0 0 0 0 0'	1 (positive); 4 (negative); 8 (negative);
6	CHL	Skin	'1 -1 0 0 0 0 1 0 0 0 0 0 0 0 0 0 0'	1 (positive); 2 (negative); 7 (positive);
7	A2058	Skin	'1 0 0 0 0 0 0 0 0 0 0 0 0 0 0 0 0'	1 (positive);
8	M299	Skin	'1 1 1 0 0 0 0 0 0 0 -1 1 0 0 0 0 0'	1 (positive); 2 (positive); 3 (positive); 11 (negative); 12 (positive)
9	M244	Skin	'1 1 0 0 0 -1 0 0 0 0 0 0 0 0 0 0 0'	1 (positive); 2 (positive); 6 (negative);
10	SKMEL24	Skin	'1 1 0 0 0 -1 0 0 0 0 0 0 0 0 0 0 -1'	1 (positive); 2 (positive); 6 (negative); 17 (negative);
11	SKMEL5	Skin	'1 0 0 -1 0 -1 0 0 0 0 0 0 0 0 0 0 0'	1 (positive); 4 (negative); 6 (negative);
12	M245	Skin	'1 0 0 -1 0 0 0 0 0 0 0 0 0 0 0 0 0'	1 (positive); 4 (negative);
13	M375	Skin	'1 0 0 -1 0 -1 0 -1 0 0 0 0 0 0 0 0 0'	1 (positive); 4 (negative); 6 (negative); 8 (negative);
14	M368	Skin	'1 0 0 -1 0 -1 0 0 0 0 0 0 0 0 0 0 0'	1 (positive); 4 (negative); 6 (negative);
15	M233	Skin	'1 1 1 0 0 0 1 0 0 -1 0 0 0 0 0 0 0'	1 (positive); 2 (positive); 3 (positive); 7 (positive); 10 (negative)
16	SBCL2	Skin	'1 0 1 0 0 0 0 0 0 0 0 0 0 0 0 0 0'	1 (positive); 3 (positive);
17	MALME3M	Skin	'1 0 0 -1 0 -1 0 0 0 0 0 0 0 0 0 0 0'	1 (positive); 4 (negative); 6 (negative);
18	M263	Skin	'1 0 0 0 -1 0 0 0 0 0 0 0 0 0 0 0 0'	1 (positive); 5 (negative);
19	WC00117A	Skin	'1 0 0 0 0 -1 0 0 0 0 0 0 0 0 0 0 0'	1 (positive); 6 (negative);
20	WC00119A	Skin	'1 1 0 -1 0 -1 0 0 0 0 0 0 0 1 0 0 0'	1 (positive); 2 (positive); 4 (negative); 6 (negative); 14 (positive)
21	G361	Skin	'1 0 0 0 0 -1 0 0 0 0 0 0 0 0 0 0 0'	1 (positive); 6 (negative);
22	M296	Skin	'1 1 1 0 0 -1 0 1 0 0 0 0 0 0 0 0 0'	1 (positive); 2 (positive); 3 (positive); 6 (negative); 8 (positive)
23	WM115	Skin	'1 1 1 0 0 0 0 0 0 0 0 0 0 0 0 0 0'	1 (positive); 2 (positive); 3 (positive)
24	WM1366	Skin	'1 0 0 0 0 0 0 0 0 0 0 0 0 0 0 0 0'	1 (positive);
25	M285	Skin	'1 0 0 0 0 -1 0 0 0 0 0 0 0 -1 0 0 0'	1 (positive); 6 (negative); 14 (negative)
26	M238	Skin	'1 0 0 -1 0 0 0 0 0 0 0 0 0 1 0 0 0'	1 (positive); 4 (negative); 14 (positive);
27	M328	Skin	'1 0 0 0 0 -1 0 0 0 0 0 0 0 0 0 0 0'	1 (positive); 6 (negative);
28	M202	Skin	'1 0 0 0 0 -1 0 0 0 0 0 0 0 0 0 0 0'	1 (positive); 6 (negative);
29	COLO829	Skin	'1 0 0 -1 0 -1 0 0 0 0 0 0 0 0 0 0 0'	1 (positive); 4 (negative); 6 (negative);
30	M318	Skin	'1 1 0 0 0 0 1 0 0 0 0 0 0 0 0 0 0'	1 (positive); 2 (positive); 7 (positive)
31	A375	Skin	'1 0 1 0 0 -1 0 0 0 0 0 0 0 0 0 0 0'	1 (positive); 3 (positive); 6 (negative);
32	M275	Skin	'1 -1 0 -1 0 -1 0 0 0 0 0 0 0 0 0 0 0'	1 (positive); 2 (negative); 4 (negative); 6 (negative);
33	SKMEL31	Skin	'1 0 0 0 0 0 0 0 0 0 0 0 0 0 0 0 0'	1 (positive);
34	SKMEL1	Skin	'1 0 0 -1 0 -1 0 -1 0 0 0 0 0 0 0 0 0'	1 (positive); 4 (negative); 6 (negative); 8 (negative);
35	S19	Skin	'1 1 1 0 0 0 0 0 0 0 0 1 0 -1 0 0 0'	1 (positive); 2 (positive); 3 (positive); 12 (positive); 14 (negative);
36	M230	Skin	'1 0 0 -1 0 -1 0 0 0 0 1 0 1 -1 0 0 0'	1 (positive); 4 (negative); 6 (negative); 11 (positive); 13 (positive); 14 (negative);
37	M262	Skin	'1 0 0 -1 0 -1 0 0 0 0 0 0 0 0 0 0 0'	1 (positive); 4 (negative); 6 (negative);
38	SKMEL173	Skin	'1 0 0 0 0 -1 0 -1 0 0 0 0 0 0 0 0 0'	1 (positive); 6 (negative); 8 (negative);
39	M288	Skin	'1 0 0 -1 0 0 0 0 0 0 0 0 0 0 0 0 0'	1 (positive); 4 (negative);
40	M229	Skin	'1 0 0 -1 0 -1 0 0 0 0 0 0 0 0 0 0 0'	1 (positive); 4 (negative); 6 (negative);

## Sheet: Barcode frequency of appearance
Barcode index	Barcode	Number of melnoma cell lines harboring this barcode
1	'1 0 0 -1 0 -1 0 0 0 0 0 0 0 0 0 0 0'	7
2	'1 0 0 0 0 -1 0 0 0 0 0 0 0 0 0 0 0'	5
3	'1 0 0 0 0 0 0 0 0 0 0 0 0 0 0 0 0'	3
4	'1 0 0 -1 0 0 0 0 0 0 0 0 0 0 0 0 0'	2
5	'1 0 0 -1 0 -1 0 -1 0 0 0 0 0 0 0 0 0'	2
6	'1 1 0 0 0 0 0 0 0 0 0 0 0 0 0 0 0'	1
7	'1 0 0 -1 0 -1 0 0 0 0 0 0 0 1 0 0 0'	1
8	'1 0 0 -1 0 0 0 -1 0 0 0 0 0 0 0 0 0'	1
9	'1 -1 0 0 0 0 1 0 0 0 0 0 0 0 0 0 0'	1
10	'1 1 1 0 0 0 0 0 0 0 -1 1 0 0 0 0 0'	1
11	'1 1 0 0 0 -1 0 0 0 0 0 0 0 0 0 0 0'	1
12	'1 1 0 0 0 -1 0 0 0 0 0 0 0 0 0 0 -1'	1
13	'1 1 1 0 0 0 1 0 0 -1 0 0 0 0 0 0 0'	1
14	'1 0 1 0 0 0 0 0 0 0 0 0 0 0 0 0 0'	1
15	'1 0 0 0 -1 0 0 0 0 0 0 0 0 0 0 0 0'	1
16	'1 1 0 -1 0 -1 0 0 0 0 0 0 0 1 0 0 0'	1
17	'1 1 1 0 0 -1 0 1 0 0 0 0 0 0 0 0 0'	1
18	'1 1 1 0 0 0 0 0 0 0 0 0 0 0 0 0 0'	1
19	'1 0 0 0 0 -1 0 0 0 0 0 0 0 -1 0 0 0'	1
20	'1 0 0 -1 0 0 0 0 0 0 0 0 0 1 0 0 0'	1
21	'1 1 0 0 0 0 1 0 0 0 0 0 0 0 0 0 0'	1
22	'1 0 1 0 0 -1 0 0 0 0 0 0 0 0 0 0 0'	1
23	'1 -1 0 -1 0 -1 0 0 0 0 0 0 0 0 0 0 0'	1
24	'1 1 1 0 0 0 0 0 0 0 0 1 0 -1 0 0 0'	1
25	'1 0 0 -1 0 -1 0 0 0 0 1 0 1 -1 0 0 0'	1
26	'1 0 0 0 0 -1 0 -1 0 0 0 0 0 0 0 0 0'	1
